# Supplementary material for: Attention-aware with stacked embedding for sentiment analysis of student feedback through deep learning techniques
Source: PeerJ journal article supplement (doi:10.7717/peerj-cs.2283), 2024-09-02
Supplement: UITVSFC.zip [file UITVSFC.zip]

## Sheet: Sheet1
sents	sentiments	topics
Full course slides .	2	1
Enthusiastic teaching, close to students.	2	0
Attend school with full marks for attendance.	0	1
have not yet applied information technology and teaching aids.	0	0
The teacher teaches well, there are many example exercises right in the classroom.	2	0
lecturers ensure class time , actively answer students questions , frequently ask students questions .	2	0
Your name is too long but I remember it as a gift for you.	1	3
yes no comments.	1	3
well okay .	1	3
web test .	1	3
We took about 4 weeks off like that.	1	3
we represent freshmen, and we be still not able to make our own products, we study industry introduction for orientation purpose, we learn about embedded systems for purpose purpose of whether we should follow that industry or not, and we speak in a way that we understand and access from sources of information.	1	3
we represent freshmen, and we be still not able to cause our own products, we study industry introduction for orientation purpose, we learn about embedded systems for purpose purpose of whether we should follow that industry oregon not, and we speak in a way that we understand and access from sources of information.	1	3
The study time is too long, not guaranteeing effective acquisition.	0	1
The subject content is somewhat lacking in focus , almost in general , making it very difficult for students to grasp the subject content .	0	1
need to speak more clearly by presenting on the board instead of looking at the slide .	0	1
The teacher is very dedicated and comes to teach on time.	2	0
easily pressured.	0	3
The subject is easy and needs to be increased in difficulty.	0	1
students can visit many companies to see the scale and way of working, to help better understand the industry they are studying.	0	1
satisfied about all .	2	3
enthusiastic, cheerful.	2	0
find enthusiasm in the exchange of learning help .	2	0
His teaching style is very close to students	2	0
Teaching combines effective recreational activities.	2	0
It is necessary to create seminars so that students can understand more deeply about issues in the major but not in the subject.	0	1
comfortable class.	2	0
Enthusiastic teacher, cares about students.	2	0
Enthusiastic teaching, detailed instructions until students understand	2	0
There are not many periods of doing homework and correcting classwork.	0	1
Much and complete documentation on moodle .	2	1
The reader should give specific examples of the important parts, so that they can comprise explained carefully thence that they buns cost illustrated with examples to avoid repeating over and all over again, which will create a feeling of tedium for students.	0	0
The lecturer should give specific examples of the important office, so that they can constitute explained carefully so that they give the axe be illustrated with examples to obviate repeating over and o'er again, which will create a feeling of boredom for students.	0	0
The lector should present specific examples of the important parts, so that they can be explicate carefully so that they hind end be illustrated with examples to avoid repeating terminated and all over once more, which volition create a feeling of boredom for student.	0	0
The lecturer should give specific examples of the of import parts, so that they can cost explained carefully thusly that they can be illustrate with examples to avoid repetition over and over again, which will create a feeling of boredom for students.	0	0
The lecturer should give specific examples of the of import part, so that they can make up excuse carefully so that they can be illustrated with examples to avoid repeating over and all over again, which will create a feeling of boredom for students.	0	0
The reader should give specific examples of the important persona, so that they keister be explained carefully so that they can be illustrated with examples to avoid repeating over and over once again, which will make a feeling of boredom for students.	0	0
The lecturer should give specific examples of the important persona, so that they lav be explained carefully so that they can be illustrated with examples to avoid repeating over and over over again, which will create a feeling of boredom for students.	0	0
The lecturer should give specific examples of the important portion, so that they can be explain carefully so that they can be illustrated with illustration to fend off repetition concluded and over again, which will create a feeling of tedium for students.	0	0
The reader should gift specific examples of the important character, so that they can be explained carefully so that they can be illustrated with examples to avoid repeating complete and over again, which will create a feeling of tedium for students.	0	0
The lecturer should give specific model of the important parts, so that they can be explained carefully so that they can be illustrate with examples to avoid repeating over and over again, which bequeath create a spirit of boredom for students.	0	0
The lecturer should give specific exercise of the important parts, so that they can exist explained carefully then that they prat be illustrated with examples to avoid repetition over and over again, which will create a feeling of boredom for students.	0	0
The lecturer should give specific examples of the important share, so that they can be explained cautiously so that they displace constitute illustrated with examples to avoid repeating over and all over again, which will create a feeling of boredom for educatee.	0	0
The lector should give specific examples of the important parts, so that they can be explained carefully so that they can comprise illustrated with good example to avoid repeating ended and over again, which volition make a feeling of boredom for student.	0	0
The lector should give specific lesson of the crucial parts, so that they ass be explained carefully so that they can be illustrated with examples to avoid repeating over and over once again, which will create a tactual sensation of ennui for students.	0	0
The lecturer should pass on specific examples of the important parts, so that they butt be explicate carefully thus that they can be illustrated with examples to ward off repeating over and all over again, which will create a smell of boredom for students.	0	0
The lecturer should give specific exemplar of the important parts, so that they can be explained cautiously thus that they tooshie be illustrated with examples to avoid repeating over and all over once more, which will create a feeling of boredom for students.	0	0
The lecturer should contribute specific exemplar of the of import parts, so that they can be explained cautiously so that they can be illustrated with examples to avoid repetition over and all over again, which testament create a feeling of boredom for students.	0	0
The lecturer should give specific examples of the important parts, so that they can be explained carefully and then that they can be illustrated with examples to head off repeating complete and over again, which will make a feeling of ennui for students.	0	0
The lector should cave in specific examples of the important office, so that they can be explained cautiously so that they derriere be illustrated with example to avoid repeating over and over again, which will create a feeling of boredom for students.	0	0
The lecturer should give specific model of the important part, so that they can be explained carefully so that they can be instance with examples to avoid repeating over and o'er again, which will create a feeling of boredom for scholarly person.	0	0
The reader should give specific examples of the important parts, so that they can be explain carefully so that they can be illustrated with examples to avoid repeating over and over again, which will make a tactual sensation of tedium for students.	0	0
The lector should make specific instance of the important parts, so that they lavatory embody explained carefully and so that they can be illustrated with examples to avoid repeating over and over again, which will create a feeling of boredom for students.	0	0
The lecturer should give specific examples of the important part, so that they canful be explained cautiously so that they can be illustrated with examples to avoid repeating concluded and over again, which will create a feeling of boredom for students.	0	0
The lecturer should apply specific examples of the important parts, so that they can be explained carefully so that they can be illustrated with examples to avoid repeating ended and over over again, which will produce a feeling of ennui for scholarly person.	0	0
The lecturer should give specific examples of the important parts, so that they can make up excuse carefully so that they buttocks be illustrated with examples to avoid repetition over and over once again, which will create a feeling of boredom for pupil.	0	0
The lecturer should give specific examples of the important parts, so that they toilet be explained carefully and then that they can be illustrated with examples to invalidate repeating over and all over once more, which will create a feeling of tedium for bookman.	0	0
The lector should throw specific examples of the important parts, so that they can be explain carefully so that they can comprise illustrated with good example to keep off repeating concluded and over again, which will create a intuitive feeling of boredom for students.	0	0
The reader should give specific examples of the important parts, so that they fire be explain carefully so that they can be illustrated with examples to avoid repeating all over and over once again, which bequeath create a feeling of boredom for students.	0	0
The lecturer should give specific examples of the important parts, so that they can be explained carefully then that they can equal exemplify with examples to avoid repeating over and over again, which will create a tone of tedium for scholarly person.	0	0
The reader should feed specific examples of the important parts, so that they terminate represent explained carefully so that they can comprise illustrated with examples to void repeating over and over again, which will produce a feeling of boredom for scholarly person.	0	0
The lecturer should give specific examples of the important share, so that they can buoy exist explained carefully indeed that they can be illustrated with examples to avoid repeating over and over once again, which will create a feeling of tedium for students.	0	0
The lecturer should give specific examples of the important parts, so that they can be explained carefully therefore that they can be illustrate with examples to avoid repetition over and over once again, which will make a feeling of boredom for student.	0	0
The lecturer should fall in specific examples of the important parts, so that they can be explicate carefully so that they can represent illustrated with deterrent example to avoid repeating all over and over again, which will make a look of boredom for students.	0	0
The lecturer should give specific good example of the important parts, so that they toilet live explained carefully so that they can be illustrated with examples to debar repeating over and over over again, which will make a feeling of boredom for scholar.	0	0
The lecturer should give specific examples of the important parts, so that they tail exist excuse carefully so that they can be illustrated with instance to avoid repetition over and over again, which will create a intuitive feeling of boredom for educatee.	0	0
The reader should give specific examples of the important parts, so that they can make up explained carefully so that they can be illustrated with examples to keep off repeating over and over once more, which will produce a feeling of boredom for students.	0	0
The lecturer should give specific good example of the important portion, so that they bottom be explained cautiously so that they can be illustrated with examples to avoid repeating over and o'er over again, which will create a feeling of boredom for students.	0	0
The lecturer should give specific examples of the important portion, so that they can be explained carefully so that they posterior exist illustrated with examples to avoid repeating over and over again, which will create a smell of boredom for students.	0	0
The lecturer should give specific examples of the important parts, so that they seat be explained carefully hence that they can be illustrated with examples to avoid repetition over and over again, which will create a feeling of boredom for student.	0	0
The lecturer should give specific examples of the important parts, so that they can buoy be explained carefully so that they fire personify illustrated with good example to avoid repeating terminated and o'er again, which will create a notion of boredom for students.	0	0
The lecturer should give specific examples of the important parts, so that they hindquarters be explain cautiously so that they can be illustrated with examples to avoid repeating over and over again, which will create a smell of boredom for students.	0	0
The lecturer should give specific examples of the important office, so that they can be explained carefully so that they dismiss be instance with representative to avoid repeating over and over again, which volition create a feeling of boredom for students.	0	0
The lecturer should give specific examples of the important parts, so that they can be explained carefully so that they toilet follow illustrated with examples to avoid repeating over and o'er again, which bequeath make a feeling of boredom for students.	0	0
The lecturer should give specific examples of the important parts, so that they buttocks personify explained cautiously and then that they can be illustrated with examples to avoid repeating over and over again, which will create a feeling of boredom for students.	0	0
The lecturer should give specific examples of the of import role, so that they crapper be explained carefully so that they can be illustrate with examples to avoid repeating all over and over again, which will create a feeling of boredom for students.	0	0
The lector should kick in specific model of the important parts, so that they can be explained carefully thus that they can represent illustrated with examples to deflect repeating terminated and over again, which will create a flavour of boredom for students.	0	0
The lecturer should give specific illustration of the important parts, so that they can be explained cautiously so that they can cost illustrated with examples to avoid repetition over and o'er again, which will make a feeling of boredom for students.	0	0
The lecturer should give specific examples of the important parts, so that they can be explained carefully so that they can constitute illustrated with examples to avoid repetition ended and over once more, which will create a flavour of boredom for students.	0	0
The reader should give specific examples of the crucial portion, so that they can be explained carefully so that they can be illustrated with examples to avoid repetition over and over again, which leave create a feeling of tedium for students.	0	0
The lecturer should pay specific instance of the important parts, so that they can be explained cautiously so that they can be illustrated with example to avoid repetition over and o'er again, which will create a feeling of boredom for students.	0	0
The lecturer should render specific examples of the important part, so that they can be explained carefully so that they can be illustrate with examples to avoid repetition terminated and over again, which leave create a feeling of boredom for students.	0	0
The lecturer should give specific example of the important parts, so that they can be explained cautiously therefore that they can be illustrated with examples to avoid repeating terminated and over again, which will create a belief of ennui for students.	0	0
The lecturer should leave specific examples of the important parts, so that they pot be explained cautiously so that they can be illustrate with examples to debar repeating over and over again, which bequeath create a spirit of boredom for students.	0	0
The lecturer should ease up specific instance of the important parts, so that they can be explained carefully so that they ass embody illustrated with examples to avoid repeating over and over again, which will produce a feeling of boredom for students.	0	0
The reader should feed specific examples of the of import parts, so that they can be explained carefully thence that they butt be illustrate with examples to avoid repeating over and over again, which will create a feeling of boredom for students.	0	0
The lecturer should give specific examples of the significant parts, so that they can personify excuse carefully so that they can be instance with examples to avoid repeating concluded and over again, which will produce a feeling of tedium for students.	0	0
The lecturer should give specific lesson of the important share, so that they can be explained carefully so that they can constitute illustrated with examples to nullify repeating over and over again, which will create a feeling of boredom for student.	0	0
The lecturer should give specific examples of the important parts, so that they can exist explained cautiously so that they dismiss be illustrated with examples to avoid repeating over and all over over again, which will create a feeling of boredom for pupil.	0	0
The lector should give specific examples of the important parts, so that they can be explained carefully so that they can constitute illustrated with example to avoid repeating over and all over again, which will create a feeling of boredom for educatee.	0	0
The reader should give specific examples of the important parts, so that they can be explain carefully so that they can be illustrated with examples to avoid repeating over and over once more, which testament make a feeling of boredom for students.	0	0
The lecturer should give specific example of the important parts, so that they nates be explained carefully and so that they can be illustrated with examples to avoid repeating over and o'er again, which will produce a tactile sensation of boredom for students.	0	0
The lecturer should give specific examples of the important parts, so that they can be explained carefully so that they can be instance with good example to avoid repetition over and over once again, which will create a feeling of boredom for students.	0	0
The reader should give specific examples of the crucial parts, so that they ass be explain carefully so that they lav be illustrated with examples to avoid repeating over and o'er again, which will create a feeling of boredom for pupil.	0	0
The lecturer should establish specific examples of the important parts, so that they can comprise explain carefully therefore that they can be illustrated with examples to keep off repetition over and over again, which will create a feeling of boredom for pupil.	0	0
The lecturer should give specific examples of the important character, so that they can be explicate carefully so that they ass be illustrated with examples to avoid repeating over and over again, which volition make a feeling of boredom for students.	0	0
The lecturer should contribute specific examples of the important parts, so that they can buoy be explained carefully so that they can be illustrated with examples to avoid repetition over and over once again, which will create a flavor of boredom for students.	0	0
The lecturer should afford specific examples of the significant theatrical role, so that they can be explain carefully so that they can be illustrated with examples to keep off repeating over and over again, which will create a feeling of boredom for students.	0	0
The lecturer should cave in specific exemplar of the important parts, so that they can make up explained carefully so that they can be illustrated with examples to avoid repeating complete and over once again, which will create a feeling of tedium for students.	0	0
The lecturer should give specific example of the important parts, so that they can be explained carefully so that they can be illustrated with case to avoid repeating over and over once more, which leave create a feeling of tedium for students.	0	0
The lecturer should give specific examples of the authoritative parts, so that they hindquarters be explained cautiously so that they can be illustrated with examples to ward off repetition over and over over again, which will create a feeling of boredom for students.	0	0
The lecturer should give specific illustration of the important parts, so that they tin be explicate carefully so that they can be illustrate with examples to avoid repeating over and o'er over again, which will make a feeling of boredom for students.	0	0
The lecturer should give specific examples of the important parts, so that they can be explained carefully so that they can equal illustrated with examples to avert repetition over and over once again, which will create a feeling of boredom for students.	0	0
The lecturer should give specific examples of the of import role, so that they can be explained carefully so that they can be illustrated with example to avoid repetition over and over again, which will produce a feeling of boredom for students.	0	0
The lecturer should give specific examples of the important parts, so that they toilet be explained carefully thence that they can follow illustrated with good example to avoid repeating over and over again, which will create a feeling of tedium for scholarly person.	0	0
The lecturer should afford specific examples of the important parts, so that they can follow explained carefully so that they can make up illustrated with examples to avoid repeating over and over again, which will create a feeling of boredom for educatee.	0	0
The lector should give specific examples of the important percentage, so that they rump be explained carefully thus that they crapper be illustrate with examples to avoid repeating over and over again, which will produce a feeling of boredom for students.	0	0
The lecturer should give specific examples of the significant parts, so that they can be explained carefully so that they can be illustrated with examples to avoid repeating over and over again, which bequeath make a tactual sensation of ennui for students.	0	0
The lecturer should give specific lesson of the important part, so that they can be explicate cautiously so that they can be illustrated with instance to avoid repeating over and over over again, which will create a feeling of boredom for students.	0	0
The lecturer should give specific example of the important parts, so that they tooshie be explained carefully so that they potty equal illustrated with examples to avoid repeating over and over again, which volition create a feeling of boredom for students.	0	0
The lector should give specific examples of the of import parts, so that they can be explain carefully so that they dismiss be illustrated with examples to avoid repetition over and o'er again, which will create a feeling of boredom for students.	0	0
The reader should give specific examples of the important part, so that they can be explained carefully so that they can be exemplify with deterrent example to avoid repeating over and all over again, which will create a feeling of boredom for pupil.	0	0
The lecturer should give specific examples of the crucial parts, so that they can be explained carefully so that they can buoy be illustrate with example to avoid repeating all over and over again, which will create a feeling of boredom for students.	0	0
The lecturer should give specific examples of the important parts, so that they can cost explained carefully so that they can be illustrated with example to avoid repeating ended and o'er again, which will create a feeling of boredom for bookman.	0	0
The lecturer should give specific lesson of the important piece, so that they hindquarters be explained carefully so that they nates follow illustrated with examples to avoid repeating over and over again, which will make a feeling of boredom for students.	0	0
The lecturer should impart specific illustration of the important parts, so that they can be explained carefully so that they can be illustrated with examples to avoid repetition over and all over once again, which testament make a feeling of boredom for students.	0	0
The lecturer should pay specific examples of the important voice, so that they can embody explained carefully so that they can be illustrated with examples to avoid repeating ended and over again, which bequeath produce a feeling of boredom for students.	0	0
The reader should give specific examples of the important theatrical role, so that they lav be explained carefully and so that they can be illustrated with examples to avoid repeating over and over again, which will create a feeling of tedium for students.	0	0
The lecturer should give specific examples of the important parts, so that they can be explained carefully so that they can personify illustrated with examples to avoid repeating all over and o'er again, which will create a tone of boredom for pupil.	0	0
The lecturer should contribute specific examples of the important parts, so that they can live explained cautiously and so that they can be illustrated with examples to avoid repeating all over and over over again, which will create a feeling of boredom for student.	0	0
The reader should give specific examples of the important parts, so that they can be explained carefully so that they can comprise illustrated with examples to avoid repeating concluded and over over again, which testament create a look of boredom for educatee.	0	0
The lecturer should give specific examples of the significant parts, so that they can make up explained cautiously so that they can be illustrated with examples to avoid repeating over and over again, which will create a feeling of boredom for bookman.	0	0
The reader should give specific instance of the important parts, so that they can be explained cautiously so that they buns be illustrated with examples to avoid repeating over and over again, which will create a flavor of boredom for students.	0	0
The lecturer should give specific examples of the important parts, so that they can live explain cautiously indeed that they can be illustrated with examples to avoid repetition over and over again, which will make a feeling of boredom for students.	0	0
The lecturer should give specific examples of the important parts, so that they can be explained carefully so that they can make up illustrated with examples to avoid repeating all over and o'er again, which will make a feeling of boredom for bookman.	0	0
The lecturer should give specific examples of the important parts, so that they can cost explain carefully so that they can be illustrated with examples to avoid repetition ended and over over again, which will create a feeling of tedium for students.	0	0
The lecturer should establish specific examples of the of import parts, so that they tooshie be explained cautiously so that they can be illustrated with examples to avoid repeating over and o'er again, which leave create a feeling of boredom for students.	0	0
The lecturer should give specific representative of the important part, so that they can be explained cautiously thus that they can be illustrated with examples to avoid repetition over and over again, which will create a feeling of boredom for students.	0	0
The lector should give specific examples of the important parts, so that they behind be explained cautiously so that they can be illustrated with examples to avert repeating over and over again, which will create a feeling of ennui for bookman.	0	0
The reader should afford specific example of the important parts, so that they can be explained carefully so that they tush be illustrated with examples to nullify repeating over and all over once again, which will create a feeling of boredom for students.	0	0
The lecturer should move over specific examples of the of import parts, so that they can follow explained carefully thus that they can be illustrate with examples to avoid repetition over and over again, which will create a feeling of boredom for students.	0	0
The lecturer should give specific model of the important region, so that they throne be explained carefully so that they can be illustrate with model to avoid repeating over and all over again, which will create a feeling of boredom for students.	0	0
The lecturer should give specific examples of the crucial parts, so that they can be explained cautiously and so that they can cost illustrated with examples to stave off repetition over and over again, which will create a feeling of tedium for students.	0	0
The lecturer should give specific example of the important parts, so that they can be explained carefully hence that they can be illustrated with examples to avoid repeating over and o'er again, which testament make a feeling of boredom for students.	0	0
The lecturer should give specific examples of the important parts, so that they can be explain carefully so that they tin can be illustrated with examples to forefend repeating terminated and over once more, which will create a feeling of boredom for students.	0	0
The lector should pay specific examples of the important parts, so that they can make up explicate cautiously so that they can be exemplify with examples to avoid repeating over and o'er again, which will create a feeling of tedium for students.	0	0
The lecturer should give specific examples of the important parts, so that they can be explain cautiously so that they rear end be illustrated with examples to avoid repeating over and o'er once again, which volition create a flavor of boredom for students.	0	0
The reader should founder specific examples of the crucial parts, so that they can be explained carefully so that they can be illustrated with examples to avoid repeating over and over again, which leave create a feeling of boredom for bookman.	0	0
The lector should give specific examples of the crucial parts, so that they can be explained carefully so that they can be illustrated with example to avoid repeating ended and all over again, which leave create a smell of boredom for students.	0	0
The lecturer should give specific example of the important parts, so that they force out be explained carefully so that they can equal illustrated with examples to avert repeating over and over again, which will create a tone of tedium for students.	0	0
The lecturer should give specific instance of the important persona, so that they can represent explained carefully so that they can make up illustrated with exercise to avoid repeating over and all over again, which will produce a impression of boredom for students.	0	0
The lecturer should give specific examples of the authoritative parts, so that they stool be explained carefully so that they tail be illustrated with illustration to avoid repeating over and over again, which will make a feeling of ennui for students.	0	0
The lector should give specific examples of the important share, so that they toilet be explained carefully so that they can be illustrated with examples to avert repeating over and over again, which volition make a belief of ennui for students.	0	0
The lecturer should give specific examples of the important part, so that they fire be explained carefully so that they can be illustrate with examples to avoid repeating over and all over again, which testament create a feeling of ennui for scholar.	0	0
The lector should give specific object lesson of the important parts, so that they can cost explained carefully so that they can buoy be instance with examples to avoid repeating over and over again, which will create a feeling of boredom for students.	0	0
The lecturer should give specific examples of the significant part, so that they tin be explicate carefully so that they stool make up illustrated with examples to avoid repetition over and over again, which will create a feeling of boredom for students.	0	0
The lecturer should give specific examples of the crucial parts, so that they displace be excuse carefully so that they give the axe constitute illustrated with examples to avoid repeating over and over again, which volition create a feeling of boredom for students.	0	0
The lecturer should devote specific examples of the important part, so that they can be explained carefully thence that they rear be illustrated with illustration to avoid repeating over and over over again, which will create a feeling of boredom for students.	0	0
The lecturer should give specific illustration of the important parts, so that they can be explained carefully so that they can be illustrated with examples to avoid repetition ended and over again, which will make a feeling of tedium for students.	0	0
The lecturer should yield specific examples of the important parts, so that they bum be explained cautiously so that they can be illustrated with examples to nullify repetition over and over again, which will create a tone of ennui for students.	0	0
The lecturer should give specific examples of the important parts, so that they can personify explained carefully so that they can represent illustrated with examples to obviate repeating over and over again, which will make a touch sensation of boredom for students.	0	0
The lecturer should make specific examples of the important parts, so that they can represent explicate cautiously so that they stern be illustrated with examples to avoid repeating over and over again, which will make a feeling of boredom for students.	0	0
The lecturer should give specific case of the important parts, so that they can be explain carefully so that they hindquarters be illustrated with illustration to avoid repetition over and over again, which will create a touch of boredom for students.	0	0
The lecturer should give specific example of the authoritative section, so that they can be explained carefully so that they can make up illustrated with example to avoid repeating over and over again, which will create a feeling of boredom for students.	0	0
The lecturer should give specific examples of the significant parts, so that they can be explained carefully and then that they tooshie live illustrate with examples to avoid repeating over and o'er again, which will create a tactile sensation of boredom for students.	0	0
The lecturer should give specific examples of the important parts, so that they can be explained cautiously so that they can be illustrated with example to avoid repetition over and over again, which will create a touch sensation of boredom for educatee.	0	0
The lecturer should give specific examples of the important parts, so that they can be excuse carefully so that they can cost illustrated with examples to void repeating terminated and over again, which will create a belief of boredom for students.	0	0
The lecturer should yield specific examples of the important parts, so that they can embody explained cautiously so that they can make up illustrated with examples to avoid repeating over and over again, which testament make a feeling of tedium for students.	0	0
The lecturer should give specific instance of the important parts, so that they can exist explain carefully so that they sack be instance with examples to void repeating over and over again, which will make a feeling of boredom for students.	0	0
The lecturer should give specific examples of the authoritative parts, so that they keister comprise explained cautiously so that they can be instance with examples to avoid repeating over and over again, which will create a feeling of boredom for students.	0	0
The reader should give specific examples of the important parts, so that they canful make up explained carefully so that they can be illustrated with examples to avoid repeating over and over over again, which will create a feeling of boredom for student.	0	0
The lector should give specific examples of the important parts, so that they can personify explained carefully so that they can be illustrated with examples to avoid repeating over and over again, which will produce a feeling of boredom for pupil.	0	0
The lecturer should give specific good example of the important parts, so that they crapper be explained carefully therefore that they can be illustrate with examples to avoid repetition over and over again, which will make a feeling of boredom for students.	0	0
The lecturer should chip in specific model of the important parts, so that they can be explained cautiously so that they bum be illustrated with examples to avoid repeating over and over again, which will make a feeling of ennui for student.	0	0
The lecturer should afford specific examples of the of import component part, so that they can be excuse cautiously so that they can be illustrated with examples to obviate repeating over and over over again, which will create a feeling of boredom for student.	0	0
The lecturer should give specific model of the important parts, so that they can be excuse carefully thence that they can be exemplify with examples to avoid repeating complete and over again, which will produce a feeling of ennui for students.	0	0
The reader should give specific examples of the important parts, so that they send away be explained carefully so that they can be illustrate with examples to avoid repetition over and over again, which will create a tone of boredom for students.	0	0
The reader should give specific examples of the important parts, so that they can be explained carefully so that they can constitute illustrate with examples to avoid repetition over and over again, which will create a smell of boredom for students.	0	0
The reader should give specific examples of the important parts, so that they seat be explained carefully so that they can be illustrated with examples to debar repeating over and over again, which will create a feeling of boredom for students.	0	0
The lecturer should give specific examples of the important parts, so that they tin can be explained carefully so that they can be illustrated with examples to avoid repetition over and all over again, which will create a intuitive feeling of boredom for educatee.	0	0
The lecturer should feed specific examples of the important parts, so that they rear end comprise explained carefully so that they can be illustrated with examples to annul repetition terminated and o'er again, which will create a feeling of tedium for students.	0	0
The lecturer should give specific examples of the authoritative parts, so that they can be explained cautiously so that they can be illustrated with examples to avoid repetition over and over again, which volition make a feeling of boredom for students.	0	0
The lecturer should ease up specific examples of the important voice, so that they can be excuse carefully so that they put up be illustrated with examples to avoid repeating over and over again, which testament create a feeling of boredom for students.	0	0
The lecturer should kick in specific examples of the of import parts, so that they can be explain carefully thusly that they can be illustrated with examples to avoid repeating over and o'er again, which will create a feeling of boredom for students.	0	0
The reader should give specific examples of the important parts, so that they can exist explained carefully thusly that they can be illustrated with object lesson to avoid repeating over and over again, which testament create a feeling of boredom for students.	0	0
The lecturer should give specific examples of the important parts, so that they tin can be explained cautiously so that they can be illustrated with examples to stave off repeating complete and over once again, which will create a feeling of boredom for students.	0	0
The lecturer should give specific examples of the important parts, so that they can represent explained carefully so that they potty be illustrated with representative to avoid repetition over and over again, which will create a feeling of boredom for students.	0	0
The lecturer should give specific examples of the important parts, so that they can be explain cautiously thus that they put up be illustrated with examples to debar repeating over and o'er again, which will create a feeling of ennui for scholar.	0	0
The reader should give specific examples of the important parts, so that they fanny be explain carefully thus that they can be illustrated with examples to avoid repeating over and over once more, which will create a feeling of boredom for students.	0	0
The lecturer should give specific examples of the crucial parts, so that they can exist excuse carefully so that they can be illustrate with examples to avoid repeating over and over again, which will create a feeling of ennui for students.	0	0
The lecturer should give way specific example of the important parts, so that they can be explained carefully so that they can be illustrated with example to avoid repeating over and over again, which bequeath create a notion of boredom for students.	0	0
The lector should give specific illustration of the important parts, so that they sack be explained cautiously so that they can be illustrated with deterrent example to avoid repeating over and over again, which bequeath create a feeling of boredom for students.	0	0
The lecturer should give specific examples of the important parts, so that they can be explained carefully thusly that they can be illustrated with examples to avoid repeating over and all over once more, which bequeath create a feeling of boredom for pupil.	0	0
The lecturer should give specific examples of the important parts, so that they can be explain cautiously so that they can be illustrated with examples to avoid repetition over and all over again, which will create a feeling of boredom for students.	0	0
The lector should give specific examples of the important part, so that they can be explained carefully so that they can be illustrated with examples to avoid repetition over and over again, which will create a tone of tedium for students.	0	0
The lecturer should give specific examples of the important parts, so that they can be explained carefully indeed that they can comprise instance with examples to avoid repetition ended and o'er again, which will create a feeling of boredom for students.	0	0
The lecturer should give specific examples of the important parts, so that they can comprise explained cautiously so that they can constitute illustrate with examples to avoid repeating over and all over again, which will create a opinion of boredom for students.	0	0
The lecturer should chip in specific examples of the important office, so that they can be explained cautiously indeed that they fundament be illustrated with examples to ward off repeating over and over again, which will make a feeling of boredom for students.	0	0
The lecturer should give specific examples of the crucial parts, so that they can be explained carefully so that they can personify illustrated with examples to avoid repeating complete and o'er again, which bequeath create a feeling of tedium for students.	0	0
The reader should pass on specific examples of the important region, so that they can be explicate carefully so that they can be illustrate with examples to avoid repeating over and o'er again, which will create a feeling of boredom for students.	0	0
The lecturer should give specific examples of the important parts, so that they can live explained carefully so that they sack be illustrated with case to avoid repetition over and o'er again, which will make a feeling of boredom for educatee.	0	0
The lecturer should give specific examples of the important region, so that they send away be explain carefully so that they can be illustrated with examples to annul repeating over and o'er once more, which will create a feeling of boredom for students.	0	0
The lecturer should contribute specific examples of the important parts, so that they can comprise explain carefully so that they can comprise illustrate with exemplar to avoid repeating over and over again, which will create a feeling of boredom for students.	0	0
The lecturer should give specific examples of the authoritative parts, so that they can be explain cautiously so that they can be illustrated with examples to avoid repeating over and over again, which will create a feeling of boredom for students.	0	0
The lecturer should give specific examples of the crucial parts, so that they can constitute explained carefully hence that they can be illustrated with examples to avoid repeating over and over again, which bequeath create a feeling of ennui for students.	0	0
The lecturer should give specific exercise of the important parts, so that they can be explained carefully so that they can be illustrated with example to avoid repeating over and over again, which will create a feeling of boredom for student.	0	0
The lecturer should give specific examples of the important part, so that they can be explain carefully so that they can be illustrated with illustration to avoid repeating complete and o'er once again, which will create a feeling of boredom for students.	0	0
The lecturer should give specific examples of the important parting, so that they can be explain carefully so that they can equal illustrate with examples to avoid repeating over and over again, which will create a feeling of boredom for students.	0	0
The lecturer should give specific examples of the important parts, so that they can be explained carefully so that they can be illustrated with example to avoid repeating all over and o'er again, which bequeath create a feeling of boredom for students.	0	0
The lecturer should sacrifice specific examples of the important parts, so that they can be explained carefully so that they give the axe be illustrated with examples to avoid repeating over and over once again, which will create a touch of tedium for students.	0	0
The lecturer should give specific examples of the significant parts, so that they can be explained cautiously so that they can be illustrated with examples to avoid repeating all over and o'er once again, which will create a feeling of tedium for students.	0	0
The lector should give specific examples of the important parts, so that they throne be explained carefully so that they can be illustrated with examples to avoid repeating over and over once again, which will produce a notion of boredom for students.	0	0
The lector should give specific examples of the important part, so that they sack be explained carefully thusly that they can be illustrated with illustration to avoid repeating over and over once again, which will create a look of boredom for students.	0	0
The lecturer should give specific examples of the important parts, so that they can be explained carefully so that they can be illustrated with examples to stave off repetition over and over again, which volition produce a look of ennui for student.	0	0
The lecturer should give specific examples of the crucial parts, so that they can be explained cautiously so that they can be illustrated with examples to avoid repeating over and all over again, which will make a feeling of boredom for student.	0	0
The lecturer should give specific examples of the important component, so that they rump be excuse carefully indeed that they can exist illustrate with examples to ward off repetition over and over again, which testament create a feeling of boredom for students.	0	0
The lecturer should give specific examples of the important parts, so that they can be explain carefully thence that they can be illustrated with example to avoid repeating concluded and over again, which will make a flavour of boredom for students.	0	0
The lecturer should ease up specific examples of the significant parts, so that they can be explained cautiously therefore that they can be illustrated with examples to avoid repeating over and over again, which volition create a feeling of boredom for students.	0	0
The lecturer should give specific examples of the important component, so that they can be explained carefully thusly that they seat be illustrated with examples to avert repeating over and over again, which testament make a feeling of tedium for students.	0	0
The lecturer should give specific examples of the crucial parts, so that they can be explain carefully so that they can be illustrated with examples to ward off repeating over and over again, which will produce a belief of boredom for students.	0	0
The lecturer should give specific example of the important parts, so that they can be explained carefully so that they can personify illustrated with examples to avoid repeating terminated and all over again, which will produce a feeling of boredom for students.	0	0
The lecturer should give specific examples of the significant parts, so that they can be explained carefully so that they backside be illustrated with examples to avoid repeating terminated and over once again, which will create a feeling of boredom for pupil.	0	0
The lector should give specific examples of the of import parts, so that they can be explained carefully hence that they can be illustrated with examples to fend off repeating over and over once again, which will create a touch sensation of boredom for scholarly person.	0	0
The lecturer should give specific examples of the important parts, so that they toilet make up explained cautiously so that they tush be illustrated with examples to avoid repeating over and o'er again, which will create a feeling of boredom for students.	0	0
The lecturer should give specific lesson of the important parts, so that they can be explain carefully so that they can exist illustrated with examples to avoid repeating over and over again, which will create a feeling of boredom for bookman.	0	0
The lector should give specific examples of the important parts, so that they can equal excuse carefully so that they can be instance with examples to avoid repetition over and over again, which testament create a feeling of boredom for students.	0	0
The lecturer should give specific examples of the significant portion, so that they can be explained cautiously so that they can be illustrated with examples to quash repeating over and all over again, which will create a feeling of boredom for students.	0	0
The lecturer should give specific examples of the important section, so that they can be explain carefully so that they can represent illustrated with examples to avoid repeating complete and o'er again, which will create a tactual sensation of boredom for students.	0	0
The reader should give specific examples of the crucial section, so that they rear end be explained carefully so that they can be illustrated with examples to avoid repeating over and over once again, which will create a intuitive feeling of tedium for student.	0	0
The lector should give specific instance of the important parts, so that they can be explained carefully so that they can be illustrated with example to avoid repetition over and over again, which testament create a feeling of boredom for students.	0	0
The lecturer should sacrifice specific examples of the important part, so that they can be explain carefully so that they tooshie be illustrated with examples to avoid repeating over and over again, which will create a feeling of boredom for students.	0	0
The lecturer should give specific example of the authoritative parts, so that they can be explained carefully and then that they can embody illustrate with examples to avoid repeating over and o'er again, which will create a feeling of boredom for students.	0	0
The lecturer should give specific exercise of the important parts, so that they can embody explained cautiously so that they can be illustrated with examples to avoid repeating over and over again, which will create a tone of boredom for students.	0	0
The lecturer should give specific examples of the important parts, so that they can be explicate carefully so that they john personify illustrated with examples to avoid repeating all over and over again, which will create a feeling of boredom for bookman.	0	0
The lecturer should give specific examples of the important parts, so that they can comprise explained carefully thus that they can comprise illustrated with examples to avoid repetition over and o'er again, which will create a feeling of boredom for students.	0	0
The lector should give specific examples of the important share, so that they can be explained carefully thence that they lav be illustrate with examples to avoid repeating complete and over again, which will create a feeling of ennui for scholarly person.	0	0
The reader should give specific examples of the crucial parts, so that they can represent explained carefully so that they can be illustrated with examples to avoid repeating over and over again, which leave create a feeling of boredom for students.	0	0
The lecturer should pass on specific instance of the important part, so that they can be explained cautiously so that they give notice be illustrated with examples to avoid repeating over and over again, which bequeath create a feeling of boredom for students.	0	0
The reader should give specific examples of the important part, so that they can personify explained carefully so that they can be illustrated with examples to avoid repetition over and over again, which volition create a feeling of boredom for students.	0	0
The lecturer should give specific examples of the important parts, so that they can be explained carefully so that they can be illustrated with examples to deflect repeating concluded and over again, which will make a feeling of boredom for students.	0	0
The reader should afford specific examples of the important parts, so that they can be explain carefully so that they ass be illustrate with example to avoid repetition over and o'er again, which testament create a feeling of boredom for students.	0	0
The lector should give specific examples of the important parts, so that they can be excuse cautiously so that they arse be illustrated with example to avoid repeating over and over again, which will produce a feeling of boredom for bookman.	0	0
The lecturer should give specific representative of the important parts, so that they can follow explained carefully indeed that they can be exemplify with examples to avoid repeating over and over again, which will create a feeling of boredom for bookman.	0	0
The lecturer should give specific example of the crucial parts, so that they can be explained cautiously so that they can buoy be illustrated with examples to avoid repeating over and over again, which will create a feeling of boredom for student.	0	0
The lecturer should devote specific examples of the important parts, so that they can be explained cautiously so that they can be illustrated with representative to avoid repeating over and over again, which testament create a feeling of tedium for students.	0	0
The lecturer should give specific examples of the important parts, so that they can equal explained carefully hence that they tin can be illustrated with examples to avoid repeating over and all over again, which will create a feeling of boredom for students.	0	0
The lecturer should give specific examples of the significant parts, so that they can be explained carefully so that they can be illustrated with instance to head off repeating over and over again, which will make a feeling of tedium for students.	0	0
The lecturer should give specific examples of the important parts, so that they prat be explained carefully so that they can constitute illustrated with examples to ward off repeating ended and o'er again, which leave make a feeling of ennui for students.	0	0
The reader should sacrifice specific examples of the important parts, so that they can be explained carefully and so that they can be illustrated with examples to invalidate repeating over and over again, which will make a feeling of boredom for scholar.	0	0
The lecturer should give specific example of the important parts, so that they can live explained carefully so that they can be illustrated with examples to avoid repetition over and over again, which will make a tactual sensation of boredom for students.	0	0
The lector should give specific examples of the significant parts, so that they can be explained carefully so that they rump be illustrated with model to avoid repeating over and o'er again, which will create a impression of boredom for pupil.	0	0
The lecturer should give specific examples of the significant parts, so that they sack be excuse carefully so that they can be illustrated with case to avoid repeating over and o'er again, which will create a feeling of tedium for pupil.	0	0
The lector should give specific instance of the important parts, so that they can be excuse cautiously so that they potty be exemplify with examples to avoid repeating over and over once more, which will create a feeling of boredom for bookman.	0	0
The lecturer should give specific examples of the important parts, so that they can equal explained carefully so that they pot be illustrated with examples to avoid repeating over and over again, which bequeath make a touch sensation of boredom for students.	0	0
The lecturer should give specific representative of the important parts, so that they can be explained cautiously so that they fanny be illustrated with examples to avoid repeating all over and over over again, which will create a feeling of boredom for students.	0	0
The lecturer should give specific good example of the important parts, so that they hind end be explained carefully so that they tin can be illustrated with examples to avoid repeating over and over again, which will create a touch of tedium for students.	0	0
The lecturer should give specific model of the important part, so that they can be explained carefully so that they can exist illustrated with examples to avoid repetition over and over once more, which will create a feeling of boredom for students.	0	0
The lector should give specific examples of the important parts, so that they can be excuse cautiously hence that they can be illustrated with model to avoid repeating concluded and over over again, which testament create a feeling of boredom for students.	0	0
The reader should give specific model of the of import function, so that they can be explained carefully so that they can be illustrated with examples to avoid repeating all over and over again, which will create a feeling of boredom for students.	0	0
The reader should pass specific examples of the important part, so that they can be explained carefully thus that they can be illustrated with lesson to avoid repetition over and o'er again, which will create a feeling of boredom for student.	0	0
The lecturer should give specific examples of the of import parts, so that they can be explained cautiously so that they can be illustrated with instance to avoid repetition over and o'er over again, which will create a feeling of tedium for students.	0	0
The lecturer should give specific examples of the important contribution, so that they can be explained carefully so that they displace be illustrate with examples to avoid repetition over and over once more, which will create a touch of boredom for students.	0	0
The lecturer should give specific example of the significant parts, so that they can be explicate carefully so that they can be instance with examples to avoid repeating over and over again, which will create a feeling of boredom for students.	0	0
The lecturer should give specific examples of the authoritative parts, so that they can equal explained carefully so that they dismiss be illustrate with examples to avoid repeating over and all over again, which will create a touch of ennui for students.	0	0
The lecturer should give specific object lesson of the of import parts, so that they can equal explained carefully so that they crapper be instance with examples to avoid repeating over and over once more, which testament create a feeling of boredom for students.	0	0
The lecturer should give specific examples of the important parts, so that they rump be explain carefully so that they can be illustrated with exemplar to avoid repeating over and over once more, which will create a touch of boredom for students.	0	0
The lecturer should commit specific examples of the significant parts, so that they can be explained carefully thence that they hindquarters constitute illustrated with examples to avoid repeating over and over again, which will create a intuitive feeling of boredom for educatee.	0	0
The reader should give specific model of the important parts, so that they can be explained carefully so that they can be illustrated with example to avoid repeating over and o'er again, which will produce a feeling of boredom for students.	0	0
The lecturer should give specific examples of the important parts, so that they can be explain carefully so that they can be illustrate with examples to avoid repeating concluded and over again, which will make a feeling of boredom for bookman.	0	0
The lecturer should give specific examples of the important parts, so that they can be explained cautiously so that they can be illustrated with example to forfend repeating over and over again, which testament create a tone of boredom for students.	0	0
The lecturer should give specific examples of the important parts, so that they stool be explain carefully so that they can be instance with examples to avoid repeating ended and over again, which volition create a belief of boredom for students.	0	0
The lecturer should give specific examples of the important parts, so that they can be explained carefully then that they can be illustrated with model to avoid repeating over and o'er again, which will make a tactual sensation of boredom for students.	0	0
The lecturer should afford specific examples of the important parts, so that they can be explained cautiously so that they can be illustrated with object lesson to avoid repeating over and over again, which will create a feeling of ennui for educatee.	0	0
The lecturer should fall in specific examples of the important part, so that they can embody explained carefully so that they can constitute illustrated with examples to avoid repeating over and over again, which will produce a feeling of boredom for student.	0	0
The lecturer should give specific examples of the important parts, so that they can cost explained carefully so that they give the sack be illustrated with examples to invalidate repeating ended and all over once again, which leave create a feeling of boredom for students.	0	0
The lecturer should give specific examples of the important character, so that they can be explained cautiously so that they can make up illustrated with examples to void repeating over and over over again, which will create a feeling of boredom for students.	0	0
The reader should give specific examples of the important parts, so that they can be explained cautiously thus that they can be illustrated with examples to avoid repeating over and over again, which volition create a feeling of boredom for students.	0	0
The lector should move over specific examples of the significant parts, so that they can be explained carefully so that they potty be illustrated with instance to debar repetition all over and over again, which will create a feeling of boredom for students.	0	0
The lecturer should give specific examples of the important parts, so that they can embody explained cautiously so that they can be illustrated with examples to avoid repetition complete and all over again, which will create a feeling of boredom for students.	0	0
The lecturer should establish specific examples of the of import part, so that they can be explained carefully so that they can make up illustrated with instance to avoid repeating complete and all over again, which bequeath produce a feeling of boredom for students.	0	0
The lecturer should give specific exemplar of the important parts, so that they can be explained carefully so that they can be illustrate with examples to avoid repetition over and over again, which will produce a tactual sensation of boredom for bookman.	0	0
The lecturer should consecrate specific examples of the important part, so that they dismiss be explained carefully so that they can be illustrated with examples to avoid repeating over and o'er again, which volition create a flavor of tedium for students.	0	0
The lecturer should give specific case of the important parts, so that they can be explain carefully so that they hind end make up illustrated with examples to avoid repetition over and over once more, which will create a feeling of boredom for student.	0	0
The lector should give specific example of the important parts, so that they can be explained carefully so that they can be illustrated with examples to quash repeating over and over once more, which will make a feeling of boredom for student.	0	0
The lecturer should give specific examples of the important part, so that they can be explained carefully so that they can be illustrate with examples to avoid repeating over and o'er again, which will create a flavour of tedium for pupil.	0	0
The reader should give specific examples of the of import parts, so that they can personify explain carefully so that they can be exemplify with examples to avoid repeating concluded and over again, which will create a feeling of boredom for students.	0	0
The lecturer should give specific examples of the important parts, so that they can be explained carefully so that they can make up illustrated with examples to avoid repeating over and all over again, which will make a opinion of boredom for students.	0	0
The lecturer should give specific examples of the crucial parts, so that they can be explained carefully so that they can be illustrated with examples to avoid repeating over and over again, which will create a feel of boredom for educatee.	0	0
The reader should give specific instance of the important parts, so that they can live explained carefully so that they can be illustrated with examples to avoid repeating concluded and all over again, which will create a feeling of boredom for educatee.	0	0
The lector should give specific model of the important parts, so that they can embody explained carefully so that they toilet be illustrated with examples to avoid repeating over and over again, which will create a tactual sensation of boredom for students.	0	0
The reader should give specific instance of the important parts, so that they tin can be explained carefully so that they dismiss live illustrated with examples to invalidate repetition over and over again, which volition create a feeling of boredom for pupil.	0	0
The lecturer should give specific examples of the crucial parts, so that they can be excuse carefully so that they can be illustrate with examples to avoid repeating over and over again, which will create a feel of ennui for students.	0	0
The lecturer should give specific examples of the important part, so that they can make up explain carefully so that they toilet be illustrated with instance to ward off repeating over and all over again, which testament create a feeling of boredom for students.	0	0
The lecturer should throw specific examples of the important parts, so that they fanny be explained carefully so that they can follow illustrated with examples to avoid repeating ended and over again, which volition create a feeling of boredom for student.	0	0
The lecturer should turn over specific examples of the important part, so that they can be explained carefully so that they can constitute illustrated with examples to deflect repeating over and over again, which will produce a feeling of boredom for students.	0	0
The lecturer should give specific exemplar of the important parts, so that they can be explained carefully so that they can be illustrate with examples to avoid repetition over and over again, which will create a tactile sensation of boredom for students.	0	0
The lecturer should give specific example of the important parts, so that they can make up explained carefully so that they can be illustrated with deterrent example to avoid repeating over and o'er again, which will make a feeling of boredom for educatee.	0	0
The lecturer should give specific examples of the significant component part, so that they can personify explained carefully so that they can exist illustrated with examples to avoid repeating over and over again, which leave create a feeling of boredom for students.	0	0
The lecturer should devote specific examples of the important parts, so that they lav be explained carefully and so that they can personify illustrated with examples to avoid repeating complete and o'er again, which will create a feeling of boredom for students.	0	0
The lector should give specific examples of the important parts, so that they can be explain carefully so that they can follow illustrate with examples to avoid repeating over and over over again, which will create a feeling of boredom for students.	0	0
The lecturer should give specific examples of the important role, so that they can be explain carefully so that they can be illustrated with case to avoid repetition terminated and all over again, which will create a feeling of boredom for students.	0	0
The lecturer should give specific case of the important parts, so that they can be excuse carefully so that they bum comprise illustrate with examples to avoid repeating concluded and over again, which will create a feeling of boredom for students.	0	0
The lecturer should give specific examples of the important office, so that they can be explained carefully and then that they can be illustrated with examples to avoid repetition over and over again, which volition produce a smell of boredom for scholarly person.	0	0
The lecturer should gift specific examples of the important parts, so that they can follow explicate carefully then that they can be illustrated with examples to avoid repeating over and over over again, which testament create a feeling of boredom for students.	0	0
The reader should give specific examples of the of import parts, so that they can be excuse carefully so that they can be illustrated with representative to deflect repeating over and over again, which will create a feeling of ennui for scholar.	0	0
The lecturer should pay specific examples of the important parts, so that they can be explained carefully so that they behind be illustrate with examples to avoid repetition terminated and over again, which will create a feeling of boredom for students.	0	0
The reader should make specific examples of the important parts, so that they can be explain carefully thence that they can be illustrated with examples to avoid repetition over and over again, which will create a feeling of ennui for students.	0	0
The lecturer should give way specific examples of the important parts, so that they can be explained cautiously so that they can be illustrate with deterrent example to avoid repeating over and over again, which will make a flavour of boredom for students.	0	0
The lecturer should impart specific examples of the significant component, so that they can be explained carefully so that they canful be illustrated with examples to avoid repeating over and over once more, which testament create a feeling of boredom for students.	0	0
The lecturer should give specific examples of the of import parts, so that they can be explained carefully thus that they can be illustrated with illustration to avoid repeating over and over again, which leave create a tone of boredom for students.	0	0
The lecturer should give specific deterrent example of the important contribution, so that they can be explicate carefully so that they can be illustrate with examples to avoid repeating ended and over again, which will create a notion of ennui for students.	0	0
The lecturer should give specific examples of the authoritative parts, so that they can buoy be explain cautiously so that they can be illustrated with examples to avoid repetition over and over once again, which will create a feeling of boredom for students.	0	0
The reader should give specific examples of the significant parts, so that they can constitute explain carefully so that they can be illustrated with examples to avoid repeating over and over again, which testament create a feeling of boredom for students.	0	0
The lector should pay specific examples of the important division, so that they can be explain carefully so that they can be illustrated with examples to avoid repetition over and over once more, which will create a feeling of boredom for scholar.	0	0
The lecturer should give specific examples of the important parts, so that they can make up explain cautiously so that they can be illustrated with model to avoid repeating over and over once more, which testament create a tone of boredom for students.	0	0
The lecturer should give specific examples of the crucial parts, so that they can represent explained carefully so that they can be illustrated with examples to avoid repeating over and over once more, which testament create a feeling of boredom for students.	0	0
The lecturer should give specific examples of the important part, so that they can be explained carefully so that they can be illustrated with object lesson to head off repeating terminated and over again, which volition create a feeling of boredom for students.	0	0
The lecturer should give specific examples of the important parts, so that they can be explained carefully so that they put up comprise illustrated with examples to avoid repeating over and over once again, which will produce a feeling of boredom for students.	0	0
The lecturer should give specific examples of the important parting, so that they can make up explain carefully so that they can be illustrated with examples to avoid repeating over and over again, which will create a feeling of ennui for students.	0	0
The lecturer should give specific examples of the important voice, so that they can be explained carefully so that they can be instance with examples to obviate repetition over and over again, which will create a feeling of boredom for students.	0	0
The lecturer should fall in specific model of the important piece, so that they can be explained carefully so that they can be illustrated with exercise to avoid repeating over and over again, which bequeath create a flavour of boredom for student.	0	0
The lecturer should give specific examples of the important parts, so that they hind end be explained cautiously so that they can be illustrated with examples to avert repetition over and over again, which will make a feeling of boredom for students.	0	0
The lecturer should give specific object lesson of the important parts, so that they can be explained carefully so that they sack be instance with examples to avoid repeating over and over again, which will produce a spirit of boredom for students.	0	0
The reader should give specific example of the significant parts, so that they can be explained carefully hence that they can be illustrated with examples to avoid repeating over and o'er again, which volition create a feeling of boredom for students.	0	0
The lecturer should give specific examples of the important parts, so that they can personify explicate carefully indeed that they can be illustrated with examples to avoid repeating over and over again, which will make a feeling of boredom for students.	0	0
The lecturer should give specific examples of the important parts, so that they tooshie be explained cautiously so that they can be illustrated with representative to avoid repeating over and over over again, which will create a look of boredom for students.	0	0
The lecturer should feed specific examples of the significant parts, so that they can be explained cautiously so that they can be illustrated with examples to avoid repeating over and o'er again, which will create a touch of boredom for scholarly person.	0	0
The lector should turn over specific examples of the significant parts, so that they can be explicate carefully thus that they can be illustrated with good example to avoid repeating over and all over again, which will create a feeling of boredom for students.	0	0
The lecturer should give specific examples of the important parts, so that they rear end follow excuse carefully so that they commode be illustrated with examples to avoid repeating over and over again, which testament create a tone of tedium for students.	0	0
The lecturer should give specific examples of the important percentage, so that they can be explained carefully so that they toilet be illustrated with examples to nullify repeating over and over again, which will create a flavour of boredom for students.	0	0
The lecturer should give specific examples of the authoritative parts, so that they can embody explained carefully so that they can constitute illustrated with examples to obviate repeating over and o'er again, which will create a feeling of tedium for students.	0	0
The lecturer should give specific examples of the important persona, so that they can be excuse carefully so that they stern be illustrated with examples to avoid repetition over and over again, which will create a feeling of boredom for students.	0	0
The reader should give specific examples of the authoritative parts, so that they can be explained carefully so that they can constitute illustrated with examples to avoid repeating over and over again, which volition create a notion of boredom for student.	0	0
The reader should give specific example of the important parts, so that they privy be explicate carefully so that they can be illustrated with examples to keep off repeating complete and over again, which volition make a feeling of boredom for students.	0	0
The lecturer should give specific examples of the important part, so that they can be explained carefully hence that they can be illustrated with examples to stave off repeating terminated and over again, which leave create a smell of boredom for students.	0	0
The lecturer should give specific representative of the important parts, so that they can live explicate carefully so that they can be illustrated with examples to avoid repeating over and o'er once again, which will create a feeling of tedium for students.	0	0
The lecturer should give specific example of the important parts, so that they can be explained carefully so that they can be exemplify with examples to nullify repeating over and over again, which will produce a feeling of ennui for students.	0	0
The lecturer should give specific examples of the of import parts, so that they toilet be explained cautiously so that they can be illustrated with examples to avoid repetition over and over again, which will create a feeling of boredom for students.	0	0
The lecturer should give specific good example of the important parts, so that they can be explained carefully so that they stool be illustrated with examples to avoid repetition over and over again, which leave create a feeling of boredom for student.	0	0
The lecturer should give specific example of the important parts, so that they can be explain carefully so that they can constitute illustrated with example to avoid repetition over and over again, which volition make a feeling of boredom for students.	0	0
The lecturer should give specific examples of the crucial parts, so that they can be explained carefully so that they can be illustrated with example to avoid repetition over and all over again, which volition create a feeling of tedium for students.	0	0
The reader should give specific examples of the important parts, so that they sack embody explain carefully so that they can be illustrated with examples to avoid repeating over and over again, which will create a feeling of ennui for bookman.	0	0
The reader should give specific instance of the important constituent, so that they can be explained cautiously so that they can be illustrated with examples to avoid repetition over and over again, which will create a feeling of boredom for student.	0	0
The reader should give specific examples of the important parts, so that they can be explained carefully so that they can be illustrated with exemplar to annul repeating over and over again, which will create a feeling of boredom for students.	0	0
The lecturer should give specific examples of the important parts, so that they can be explain carefully so that they can be exemplify with exemplar to debar repeating over and over again, which will make a feeling of boredom for student.	0	0
The lecturer should give specific examples of the important parts, so that they can be explained carefully thus that they fundament cost illustrate with good example to avoid repetition over and o'er again, which will create a feeling of ennui for students.	0	0
The lecturer should give specific examples of the important parts, so that they can be explained cautiously hence that they can make up illustrated with object lesson to avoid repeating over and o'er again, which will create a feeling of boredom for students.	0	0
The lecturer should give specific examples of the important parts, so that they can be explained carefully indeed that they can be instance with examples to avoid repeating over and over once more, which will make a flavour of tedium for students.	0	0
The lecturer should give specific examples of the of import part, so that they ass be explained carefully so that they arse be illustrated with examples to avoid repeating over and over again, which will produce a feeling of boredom for students.	0	0
The lector should give specific examples of the important parts, so that they can be explain carefully so that they fanny be illustrated with examples to avoid repeating over and over again, which will create a feeling of ennui for students.	0	0
The lecturer should give specific examples of the important parts, so that they prat exist explain carefully so that they can be illustrated with example to avoid repetition over and over again, which will create a feeling of boredom for students.	0	0
The lecturer should yield specific examples of the important parts, so that they can comprise explained carefully thus that they can live illustrated with examples to avoid repetition over and over again, which will create a feel of boredom for students.	0	0
The reader should give specific model of the important parts, so that they can be explained carefully so that they can make up illustrated with examples to avoid repeating over and over again, which will make a feeling of ennui for students.	0	0
The lecturer should present specific examples of the important parts, so that they can be explained carefully so that they can be illustrated with examples to avoid repeating over and over once again, which will make a impression of boredom for students.	0	0
The lecturer should ease up specific examples of the important parts, so that they give notice be excuse carefully and so that they can be illustrated with examples to avoid repeating over and over again, which will create a feeling of boredom for pupil.	0	0
The lecturer should yield specific examples of the authoritative parts, so that they seat be explained cautiously so that they can be illustrated with examples to avoid repeating over and over again, which will create a feeling of ennui for pupil.	0	0
The lecturer should give specific examples of the important parts, so that they backside be explained carefully so that they can be instance with example to avoid repeating over and all over again, which will create a feeling of ennui for students.	0	0
The lecturer should give specific examples of the important parts, so that they toilet be explained carefully so that they give notice be illustrated with examples to quash repeating all over and over again, which will make a feeling of boredom for students.	0	0
The lecturer should give specific examples of the important parts, so that they can constitute excuse carefully so that they can be illustrated with examples to avoid repeating over and over again, which bequeath make a feeling of boredom for students.	0	0
The lecturer should break specific model of the important parts, so that they give notice be explain carefully so that they can be illustrated with examples to avoid repeating over and over again, which will make a feeling of boredom for scholarly person.	0	0
The lecturer should give specific examples of the important parts, so that they can be explained cautiously so that they can be illustrated with lesson to invalidate repeating all over and over again, which will make a feeling of ennui for students.	0	0
The reader should give specific examples of the important parts, so that they can be explained carefully so that they can be illustrated with examples to avoid repeating over and o'er once more, which will create a feeling of ennui for students.	0	0
The lector should give specific examples of the of import parts, so that they john cost explained carefully so that they can be illustrated with examples to avoid repeating over and over again, which will create a tactual sensation of boredom for scholarly person.	0	0
The lecturer should give specific examples of the important parts, so that they pot be explained cautiously so that they tail end make up illustrated with exemplar to avoid repeating ended and over again, which will create a feeling of ennui for students.	0	0
The reader should give specific examples of the important parts, so that they can be explained carefully so that they tin can be illustrated with examples to stave off repeating over and over again, which will produce a feeling of ennui for students.	0	0
The lecturer should give specific examples of the important parts, so that they can embody explained carefully thus that they fire be illustrated with instance to avoid repeating all over and over once more, which will create a feeling of boredom for students.	0	0
The lecturer should feed specific instance of the authoritative parts, so that they can be excuse carefully so that they stern be illustrated with examples to avoid repeating over and over again, which will create a feeling of tedium for students.	0	0
The lecturer should feed specific examples of the of import parts, so that they can follow explained carefully thus that they pot be illustrated with examples to avoid repeating all over and over again, which will create a feeling of boredom for student.	0	0
The lecturer should give specific examples of the important parts, so that they can be explained cautiously so that they can personify illustrated with examples to stave off repeating over and over again, which bequeath create a feeling of boredom for students.	0	0
The reader should give specific examples of the significant voice, so that they fundament exist explicate carefully so that they can be illustrated with examples to avoid repeating over and over again, which will create a feeling of boredom for students.	0	0
The lecturer should give specific deterrent example of the important parts, so that they fanny be explain carefully so that they can be illustrated with examples to avoid repeating over and over again, which will create a feeling of boredom for scholar.	0	0
The lecturer should give specific examples of the important parts, so that they hindquarters cost explained carefully so that they can be illustrate with example to forefend repetition over and over again, which volition make a feeling of boredom for students.	0	0
The reader should give specific examples of the important role, so that they can buoy be explained carefully so that they can be illustrated with example to avoid repeating over and over again, which bequeath create a impression of boredom for students.	0	0
The lecturer should give specific examples of the significant parts, so that they can be explained carefully so that they can be illustrated with examples to avoid repeating over and over over again, which will create a touch of boredom for pupil.	0	0
The lector should give specific examples of the important parts, so that they lav be explained carefully so that they can be illustrated with examples to avoid repeating over and over again, which volition create a tactual sensation of boredom for students.	0	0
The lecturer should give specific examples of the important parts, so that they can be explained carefully hence that they can be illustrated with example to avoid repeating all over and over again, which leave create a feeling of boredom for student.	0	0
The lector should give specific model of the authoritative parts, so that they can be explained carefully so that they can be illustrated with examples to avoid repeating over and over again, which will create a feeling of tedium for students.	0	0
The lector should yield specific examples of the important parts, so that they can equal explained carefully so that they can make up illustrated with examples to avoid repeating over and over again, which will create a belief of boredom for students.	0	0
The lector should apply specific examples of the significant role, so that they can be explained cautiously so that they can be illustrated with examples to avoid repeating over and over over again, which will create a feeling of boredom for students.	0	0
The lecturer should give specific examples of the important parts, so that they can be explained carefully so that they can represent illustrated with examples to avoid repetition over and o'er again, which will make a opinion of boredom for students.	0	0
The reader should throw specific examples of the of import portion, so that they can be explained carefully so that they can be illustrated with deterrent example to avoid repeating complete and over again, which will create a feeling of boredom for students.	0	0
The lecturer should give specific examples of the important parts, so that they can embody explained carefully so that they butt follow illustrated with example to avoid repeating all over and over once more, which will create a feeling of boredom for pupil.	0	0
The lecturer should give specific examples of the important parts, so that they canful be explained carefully so that they can be illustrated with example to avoid repeating over and over again, which bequeath create a feel of boredom for students.	0	0
The lecturer should present specific examples of the important parts, so that they can be explained carefully so that they can be illustrated with examples to avoid repetition over and all over over again, which will make a feeling of boredom for students.	0	0
The reader should give specific examples of the important parts, so that they can be explain cautiously thusly that they can be illustrated with instance to avoid repeating all over and over again, which will make a feeling of boredom for student.	0	0
The lector should give specific examples of the important parts, so that they pot embody explained carefully so that they terminate be illustrated with examples to avoid repetition terminated and over again, which will create a feeling of boredom for educatee.	0	0
The lecturer should give specific examples of the important parts, so that they displace be explained carefully so that they can be illustrated with examples to forefend repetition over and o'er again, which will make a feeling of boredom for students.	0	0
The lecturer should give specific examples of the significant parts, so that they can be explained carefully thus that they can be illustrated with model to avoid repetition over and all over again, which will create a feeling of ennui for pupil.	0	0
The reader should give specific model of the crucial parts, so that they can be explained carefully so that they can be illustrate with examples to avoid repeating over and over again, which will create a feeling of boredom for students.	0	0
The lecturer should give specific examples of the important parts, so that they can be explicate cautiously so that they can be illustrated with examples to avoid repetition over and o'er again, which will create a feeling of tedium for scholarly person.	0	0
The lecturer should give specific examples of the crucial parts, so that they can be explained carefully so that they terminate be illustrate with examples to avoid repeating over and over over again, which will make a feeling of boredom for students.	0	0
The reader should give specific examples of the crucial parts, so that they can be explained carefully hence that they butt be illustrated with examples to avoid repeating complete and over again, which volition create a tactile sensation of boredom for educatee.	0	0
The lecturer should give specific examples of the significant parts, so that they can equal explained carefully so that they can be illustrate with examples to avoid repeating all over and over again, which will create a opinion of tedium for students.	0	0
The lector should give specific examples of the authoritative part, so that they terminate be explained carefully so that they can be illustrated with examples to invalidate repetition over and over over again, which will create a feeling of boredom for students.	0	0
The lector should give specific examples of the important parts, so that they can be explained carefully so that they tin be illustrated with exercise to avoid repeating over and over again, which will create a tactual sensation of tedium for students.	0	0
The lecturer should give specific examples of the important parts, so that they rump be explained carefully so that they can follow illustrated with examples to stave off repeating over and over again, which will make a feeling of boredom for students.	0	0
The lecturer should give specific examples of the important component, so that they hind end be explain cautiously so that they can be illustrated with examples to avoid repeating over and all over again, which will create a feeling of ennui for scholarly person.	0	0
The lector should give specific examples of the important part, so that they butt be explained carefully so that they can represent illustrated with examples to avoid repeating over and all over again, which leave create a feel of boredom for students.	0	0
The lecturer should sacrifice specific examples of the important constituent, so that they can be explained carefully so that they can live illustrated with examples to avoid repetition over and over again, which will produce a feeling of boredom for students.	0	0
The lecturer should present specific examples of the important parts, so that they can be explained carefully so that they can constitute illustrated with illustration to deflect repeating over and over once more, which testament create a feeling of boredom for scholar.	0	0
The lecturer should give specific example of the important parting, so that they put up embody explained carefully so that they can be illustrated with examples to avoid repeating over and o'er again, which bequeath create a feeling of tedium for students.	0	0
The lecturer should give specific examples of the significant parts, so that they can be explain cautiously so that they can be illustrated with examples to avoid repetition complete and over again, which will make a feeling of boredom for students.	0	0
The lecturer should sacrifice specific examples of the important parts, so that they can cost explained carefully so that they can live illustrated with examples to avoid repeating over and over again, which will create a feeling of ennui for scholarly person.	0	0
The lecturer should establish specific examples of the important parts, so that they can be explicate carefully so that they stool be illustrated with examples to avoid repeating over and over again, which volition create a feeling of boredom for students.	0	0
The lecturer should give specific model of the important parts, so that they buns be explained carefully so that they can be illustrated with examples to avoid repeating over and over over again, which will create a feeling of boredom for students.	0	0
The reader should give specific examples of the important part, so that they can be explained carefully then that they can be illustrated with examples to avoid repetition ended and over again, which will produce a feeling of boredom for students.	0	0
The lecturer should pay specific object lesson of the important part, so that they can be explained carefully so that they can be illustrated with examples to avoid repetition terminated and over again, which will create a feeling of boredom for student.	0	0
The lecturer should reach specific example of the authoritative parts, so that they can be explain carefully thusly that they can live illustrated with examples to avoid repeating over and over again, which will create a flavor of boredom for students.	0	0
The lecturer should give specific examples of the crucial parts, so that they can be explicate cautiously so that they can be illustrated with examples to avoid repeating over and over again, which will create a feeling of boredom for bookman.	0	0
The lecturer should give specific exercise of the important parts, so that they can be explained carefully so that they can buoy be illustrated with examples to fend off repeating over and over again, which will make a feeling of boredom for students.	0	0
The lecturer should give specific examples of the important parts, so that they can be explained carefully so that they can be illustrated with examples to stave off repeating all over and o'er again, which will create a feeling of boredom for students.	0	0
The lecturer should hold specific examples of the important parts, so that they can cost explained cautiously so that they can be illustrated with examples to keep off repeating over and over again, which volition make a feeling of boredom for students.	0	0
The lecturer should give specific examples of the important parts, so that they keister be explicate carefully so that they can be illustrated with examples to avoid repeating over and over again, which will create a feeling of tedium for pupil.	0	0
The lecturer should give specific examples of the important parts, so that they can make up explained cautiously so that they can be illustrated with examples to nullify repetition over and all over again, which leave create a feeling of boredom for students.	0	0
The lecturer should give specific examples of the authoritative parts, so that they can be explained carefully so that they nates be illustrate with examples to avoid repeating over and o'er once again, which will create a notion of boredom for students.	0	0
The lecturer should give specific example of the crucial parts, so that they can embody explained cautiously so that they backside be illustrated with examples to avoid repeating over and over once again, which will create a feeling of boredom for student.	0	0
The lecturer should afford specific examples of the important parts, so that they stool exist explained carefully so that they can be exemplify with examples to avoid repetition over and over again, which will make a feeling of boredom for scholarly person.	0	0
The lector should dedicate specific example of the important parts, so that they can be explained carefully so that they can be exemplify with examples to avoid repeating concluded and over again, which will create a spirit of boredom for students.	0	0
The lecturer should fall in specific examples of the important parts, so that they can be explained carefully so that they can be illustrated with examples to avoid repeating over and over again, which will make a tone of boredom for student.	0	0
The lecturer should give specific examples of the important parts, so that they toilet be explained carefully so that they buns be illustrated with examples to avoid repeating all over and over again, which will create a impression of boredom for students.	0	0
The lecturer should give specific example of the important parts, so that they can represent explained cautiously so that they can constitute illustrated with examples to avoid repeating over and over again, which will create a feeling of boredom for students.	0	0
The lector should give specific examples of the important parts, so that they tush be explained carefully therefore that they fire be illustrated with example to avoid repetition over and over again, which will create a feeling of boredom for students.	0	0
The lector should give specific examples of the important parts, so that they can be explained carefully so that they can be illustrated with examples to avoid repeating over and over again, which testament create a feeling of ennui for students.	0	0
The lecturer should give way specific examples of the important role, so that they can be explained carefully so that they can exist illustrated with model to avoid repeating concluded and over again, which will create a feeling of boredom for educatee.	0	0
The lector should give specific examples of the important constituent, so that they can be explain carefully so that they can be illustrate with examples to ward off repeating over and over again, which testament create a feeling of boredom for scholarly person.	0	0
The reader should give specific examples of the important parts, so that they displace be explained carefully so that they can be illustrated with example to avoid repeating over and over once again, which will make a feeling of ennui for students.	0	0
The lecturer should kick in specific example of the important parts, so that they tail be explained carefully so that they can be illustrated with examples to avoid repeating all over and over again, which will create a feeling of boredom for students.	0	0
The lecturer should turn over specific examples of the important parts, so that they can be explained carefully so that they can be illustrated with good example to avoid repeating over and over again, which will create a feeling of boredom for students.	0	0
The lecturer should devote specific examples of the important parts, so that they can be explain carefully so that they can be illustrated with lesson to void repeating over and over over again, which leave create a feeling of boredom for students.	0	0
The lecturer should give specific exercise of the important portion, so that they can be explained carefully and then that they can be illustrated with examples to avoid repeating all over and over once more, which will create a smell of ennui for students.	0	0
The lecturer should yield specific examples of the significant parts, so that they can equal explained cautiously so that they can be illustrated with examples to avoid repetition over and over once more, which will create a feeling of boredom for students.	0	0
The lecturer should give specific example of the of import parts, so that they can be explained carefully so that they pot be instance with examples to obviate repeating over and over again, which volition create a feeling of boredom for students.	0	0
The lecturer should give specific examples of the important parts, so that they can be explained carefully so that they hind end be illustrated with lesson to avoid repetition over and o'er again, which will create a feeling of boredom for students.	0	0
The lecturer should give specific examples of the important parts, so that they stool be explicate carefully so that they can cost illustrated with lesson to avoid repeating over and all over again, which leave create a look of boredom for students.	0	0
The lecturer should give specific examples of the important parts, so that they can be explained carefully so that they can be illustrated with examples to invalidate repeating concluded and o'er again, which bequeath create a feeling of boredom for students.	0	0
The lecturer should give specific examples of the important section, so that they can be explain cautiously so that they can be illustrated with examples to avert repetition over and over once again, which will create a feeling of tedium for students.	0	0
The lecturer should give specific object lesson of the important parts, so that they keister be explained carefully and so that they can be illustrated with examples to avoid repeating over and over again, which bequeath make a feeling of boredom for scholar.	0	0
The lecturer should give specific examples of the important parts, so that they can be explained carefully so that they can be illustrate with example to annul repeating over and over once again, which bequeath create a feeling of tedium for students.	0	0
The lecturer should pass on specific examples of the important parts, so that they can be explain carefully thus that they can be illustrated with examples to avoid repeating over and over again, which bequeath create a feeling of boredom for students.	0	0
The lecturer should give specific examples of the important parts, so that they can be explained cautiously so that they can comprise illustrated with examples to avoid repeating ended and all over again, which will create a spirit of boredom for students.	0	0
The lecturer should give specific examples of the crucial parts, so that they can be explained carefully so that they can embody illustrated with examples to avoid repeating over and o'er over again, which volition create a feeling of tedium for students.	0	0
The lecturer should give specific examples of the important parts, so that they can be explained cautiously so that they can make up illustrate with instance to debar repeating over and over again, which will make a feeling of boredom for students.	0	0
The lecturer should give specific examples of the important part, so that they rear end be explained cautiously so that they can be illustrated with examples to avoid repeating over and o'er again, which will make a feeling of ennui for students.	0	0
The lector should give specific examples of the important parts, so that they behind be explained carefully so that they tail be illustrated with example to avoid repeating over and over once again, which will create a feeling of ennui for pupil.	0	0
The lecturer should founder specific examples of the important parts, so that they give the axe be explain carefully so that they can be instance with examples to avoid repeating concluded and over once again, which volition create a feeling of boredom for students.	0	0
The lecturer should render specific examples of the important piece, so that they can be explain carefully thusly that they john be illustrated with examples to avoid repetition over and o'er again, which will create a feeling of boredom for students.	0	0
The lecturer should give specific deterrent example of the crucial parts, so that they rear be explain carefully so that they can be illustrated with examples to deflect repeating ended and all over again, which will create a feeling of tedium for students.	0	0
The lecturer should return specific example of the important parts, so that they can be explained carefully therefore that they can buoy be illustrated with examples to avoid repetition over and all over again, which will create a feeling of boredom for students.	0	0
The lecturer should give specific examples of the important parts, so that they can be explained carefully so that they can be illustrated with examples to avert repeating over and over once more, which leave create a touch sensation of boredom for students.	0	0
The lecturer should give specific object lesson of the important piece, so that they can be explained carefully so that they can make up illustrate with examples to avoid repeating over and over again, which leave create a feeling of ennui for students.	0	0
The lecturer should have specific examples of the important part, so that they can be explained carefully so that they can be illustrated with examples to head off repeating over and all over again, which volition produce a feeling of boredom for students.	0	0
The lecturer should give specific examples of the important parts, so that they can be explained carefully so that they tooshie be illustrate with examples to avoid repetition all over and o'er again, which will create a feeling of boredom for bookman.	0	0
The lecturer should give specific examples of the important parts, so that they can be explained carefully therefore that they tin be instance with exercise to avoid repetition over and over again, which bequeath create a notion of boredom for students.	0	0
The lecturer should give specific examples of the important share, so that they can be explain carefully so that they can equal illustrated with examples to forefend repeating over and o'er over again, which leave make a feeling of boredom for students.	0	0
The lecturer should give specific model of the authoritative part, so that they can be explained carefully so that they can be illustrated with example to avoid repeating over and over once more, which testament create a feeling of boredom for scholarly person.	0	0
The lecturer should give specific examples of the of import parts, so that they can be explained carefully thus that they can exist illustrated with example to avoid repeating over and over again, which testament produce a feeling of boredom for students.	0	0
The lecturer should give specific examples of the important parts, so that they can follow explained cautiously so that they buns be illustrated with examples to annul repeating ended and over again, which will make a feeling of boredom for students.	0	0
The lecturer should gift specific example of the important parts, so that they commode be explained carefully so that they can be illustrated with examples to avoid repeating over and over once more, which volition create a feeling of boredom for students.	0	0
The reader should give specific examples of the important parts, so that they can be explained carefully so that they can be illustrated with examples to forefend repeating terminated and over again, which testament create a feeling of ennui for students.	0	0
The lecturer should kick in specific case of the important portion, so that they can comprise explained carefully so that they can be illustrated with examples to keep off repeating over and over again, which will create a feeling of boredom for students.	0	0
The lecturer should give specific examples of the important parts, so that they can be explained cautiously so that they stern be illustrated with case to avoid repeating over and over once again, which will create a feeling of boredom for student.	0	0
The lecturer should yield specific examples of the important parts, so that they can represent explicate carefully and so that they can be illustrated with examples to avoid repetition over and over once more, which will make a feeling of boredom for students.	0	0
The lector should give specific exemplar of the important parts, so that they can be explained carefully thus that they can be illustrate with examples to avoid repeating over and over again, which bequeath create a feeling of boredom for students.	0	0
The lector should hand specific examples of the important parts, so that they can be explain cautiously and then that they can be illustrated with instance to avoid repeating over and over again, which will create a feeling of boredom for students.	0	0
The lecturer should pay specific examples of the important parts, so that they privy exist explained carefully so that they tin can be illustrated with exemplar to avoid repeating over and over again, which will create a feeling of boredom for students.	0	0
The reader should give specific example of the important parts, so that they can be explain cautiously so that they can be illustrated with examples to avoid repeating terminated and over over again, which will create a spirit of boredom for students.	0	0
The lecturer should yield specific example of the important parts, so that they hindquarters be explained carefully so that they can be illustrated with examples to avoid repetition complete and over again, which will create a feeling of boredom for educatee.	0	0
The lecturer should give specific deterrent example of the important parts, so that they can be explained cautiously so that they give the sack be illustrated with examples to avoid repeating over and over over again, which will create a feeling of boredom for student.	0	0
The lecturer should give specific examples of the important parts, so that they can be explained cautiously so that they displace be illustrated with examples to avoid repetition over and over again, which will make a feel of boredom for students.	0	0
The lecturer should give specific examples of the important parts, so that they can be explained carefully so that they can be illustrated with examples to avoid repeating over and o'er once more, which will create a notion of boredom for students.	0	0
The lecturer should give specific examples of the authoritative parts, so that they derriere make up explained carefully so that they can be illustrated with examples to ward off repeating over and over once more, which will create a tactual sensation of boredom for student.	0	0
The reader should give specific example of the important parts, so that they lavatory be explained cautiously so that they arse be illustrated with examples to avoid repeating over and o'er again, which will create a feeling of boredom for students.	0	0
The reader should turn over specific examples of the important parts, so that they can be explained carefully so that they commode be illustrated with instance to avoid repeating over and over again, which will make a feeling of boredom for students.	0	0
The lecturer should give specific examples of the important share, so that they can be explained carefully thus that they force out comprise illustrated with examples to avoid repeating over and o'er again, which will create a feeling of boredom for students.	0	0
The reader should hold specific examples of the important parts, so that they send away be explained carefully so that they rump be illustrated with examples to avoid repeating over and over again, which will create a flavour of boredom for students.	0	0
The lector should give specific examples of the significant voice, so that they can be excuse carefully and then that they can be illustrated with model to avoid repeating over and over again, which will make a feeling of boredom for scholar.	0	0
The lecturer should give specific instance of the of import parts, so that they stern be explained cautiously so that they throne be illustrated with exercise to avoid repeating over and over once more, which will create a feeling of boredom for students.	0	0
The lector should give specific examples of the important parts, so that they can be explained cautiously indeed that they can be illustrated with examples to avoid repeating over and over once again, which volition create a feeling of boredom for students.	0	0
The lecturer should give specific object lesson of the important part, so that they can represent explained carefully so that they can be illustrated with example to avoid repeating over and over again, which bequeath create a feeling of boredom for students.	0	0
The reader should give specific examples of the important parts, so that they can be explicate carefully so that they throne equal illustrated with examples to avoid repetition over and over again, which will create a feeling of tedium for students.	0	0
The lecturer should pay specific examples of the authoritative parts, so that they can live explained carefully so that they buns be illustrated with examples to obviate repeating over and over again, which will create a feeling of boredom for students.	0	0
The lecturer should give specific examples of the significant parts, so that they can be explain carefully so that they can be illustrated with examples to ward off repetition over and o'er again, which will create a flavour of boredom for students.	0	0
The lecturer should pay specific example of the important parts, so that they can be explained carefully so that they can represent illustrated with exercise to avoid repetition over and o'er again, which will produce a feeling of boredom for students.	0	0
The lecturer should sacrifice specific examples of the crucial part, so that they can be explained carefully so that they can equal illustrated with examples to avert repeating ended and over again, which will create a feeling of boredom for students.	0	0
The lecturer should give specific examples of the important parts, so that they can be explicate cautiously so that they derriere be illustrated with object lesson to avoid repetition over and over again, which will create a feeling of boredom for students.	0	0
The lecturer should give specific examples of the significant parts, so that they can be explain carefully so that they can constitute illustrated with examples to avoid repeating over and over once more, which will create a feeling of boredom for students.	0	0
The lecturer should give specific examples of the important parts, so that they can be explained cautiously so that they can be exemplify with examples to avoid repeating over and over again, which testament create a intuitive feeling of boredom for students.	0	0
The reader should cave in specific examples of the important parts, so that they can be explained cautiously so that they can cost illustrated with example to avoid repeating over and over again, which will create a feeling of boredom for students.	0	0
The lector should fall in specific examples of the important parts, so that they dismiss be explained carefully so that they can be illustrated with instance to avoid repeating over and over again, which will create a feeling of boredom for pupil.	0	0
The lecturer should give specific examples of the important part, so that they can be explained cautiously so that they can be illustrated with examples to forefend repeating over and over again, which will create a feeling of boredom for student.	0	0
The lecturer should give specific model of the important voice, so that they toilet make up explained carefully so that they can be illustrated with examples to avoid repetition over and over again, which will create a opinion of ennui for student.	0	0
The lecturer should give specific examples of the important role, so that they can be explained cautiously so that they can be illustrated with example to avoid repeating over and all over again, which will make a feeling of boredom for students.	0	0
The lecturer should give specific object lesson of the important parts, so that they can be explain carefully and then that they can be instance with examples to avoid repetition over and over again, which will create a smell of boredom for pupil.	0	0
The lecturer should give specific model of the of import parts, so that they can be explained cautiously so that they can be illustrate with examples to forfend repeating over and o'er again, which will create a feeling of boredom for students.	0	0
The lecturer should hand specific examples of the important parts, so that they lav be explained cautiously therefore that they can be illustrated with examples to ward off repeating over and over once more, which will create a feeling of boredom for students.	0	0
The lecturer should feed specific examples of the important parts, so that they can be explain cautiously so that they can live illustrated with examples to avoid repetition over and o'er again, which will create a feeling of boredom for student.	0	0
The lecturer should give specific examples of the important parts, so that they can constitute explained carefully so that they tin make up illustrated with examples to avoid repeating concluded and over again, which will create a feeling of boredom for students.	0	0
The reader should give specific examples of the important part, so that they can be explained cautiously so that they can be illustrated with examples to void repeating over and over again, which will create a feeling of boredom for students.	0	0
The lecturer should give specific instance of the important parts, so that they can be explained carefully and then that they can represent illustrated with examples to avoid repeating over and over again, which bequeath create a feeling of boredom for scholarly person.	0	0
The lecturer should give specific examples of the important parts, so that they can be excuse carefully so that they rear end be illustrated with examples to avoid repeating terminated and over again, which bequeath create a flavour of boredom for student.	0	0
The lector should give specific examples of the significant parts, so that they can be explained carefully so that they can be illustrated with instance to avoid repeating over and o'er again, which will create a feeling of tedium for students.	0	0
The lecturer should give way specific example of the crucial parts, so that they can be explain carefully and then that they can be illustrated with example to avoid repeating over and over again, which will create a spirit of boredom for students.	0	0
The lecturer should give specific examples of the authoritative parts, so that they lav be explained carefully therefore that they can be illustrate with lesson to avoid repeating over and o'er once more, which volition create a feeling of boredom for students.	0	0
The lecturer should have specific examples of the important parts, so that they can personify explained carefully so that they can be illustrated with examples to forefend repetition terminated and over again, which will make a feeling of boredom for students.	0	0
The lecturer should give specific examples of the important parts, so that they can buoy comprise explained cautiously so that they nates be illustrated with examples to avoid repetition over and over again, which will create a feeling of boredom for student.	0	0
The reader should give specific example of the important parts, so that they can be explained carefully so that they can be illustrate with example to invalidate repeating over and over again, which will create a feeling of boredom for students.	0	0
The lecturer should give specific example of the important parts, so that they can be explained carefully and so that they can be illustrated with examples to avoid repeating ended and o'er again, which will create a feeling of boredom for students.	0	0
The lecturer should open specific examples of the important parts, so that they can be explained carefully so that they prat be exemplify with examples to avoid repeating all over and over again, which testament produce a feeling of boredom for students.	0	0
The lecturer should give specific good example of the important part, so that they can be explained carefully so that they can make up illustrated with examples to avoid repeating over and all over once again, which will create a opinion of boredom for students.	0	0
The lecturer should give specific examples of the important parts, so that they can be explained carefully so that they bottom be instance with examples to annul repeating all over and over again, which will make a feeling of boredom for student.	0	0
The lector should give specific examples of the important parts, so that they tooshie exist explained carefully so that they can be illustrated with examples to avoid repeating over and all over again, which will make a impression of boredom for student.	0	0
The lecturer should give specific examples of the of import parts, so that they can be explained carefully so that they crapper live illustrated with examples to avoid repeating over and over again, which will make a feeling of tedium for scholarly person.	0	0
The reader should pay specific examples of the important parts, so that they sack be explained carefully so that they can exist illustrated with examples to nullify repeating over and over again, which bequeath create a feeling of boredom for student.	0	0
The lecturer should give specific examples of the crucial part, so that they can buoy be explain cautiously so that they can be illustrated with examples to forfend repeating over and over again, which will create a feeling of boredom for students.	0	0
The lecturer should have specific examples of the important parts, so that they can embody explained carefully so that they can be illustrated with examples to avoid repetition all over and all over again, which will create a feeling of boredom for students.	0	0
The lecturer should give specific example of the important parts, so that they derriere be explained carefully so that they can be illustrate with instance to avoid repeating over and over once more, which will make a feeling of boredom for pupil.	0	0
The lecturer should give specific exercise of the important parts, so that they can be explained carefully so that they toilet be illustrated with examples to invalidate repeating concluded and over once more, which will make a feeling of boredom for students.	0	0
The reader should give specific examples of the important parts, so that they can be explained carefully so that they send away be instance with example to keep off repeating over and over again, which bequeath create a feeling of tedium for students.	0	0
The lecturer should give specific examples of the important function, so that they can personify explained carefully so that they can be illustrated with examples to avoid repeating over and o'er again, which will create a feeling of boredom for students.	0	0
The lecturer should pass specific example of the important parts, so that they can be explained carefully so that they can follow illustrated with illustration to nullify repeating over and over again, which will create a feeling of boredom for pupil.	0	0
The lecturer should yield specific examples of the important parts, so that they can be explained carefully so that they can be illustrated with examples to avoid repeating over and over again, which leave create a intuitive feeling of boredom for students.	0	0
The lecturer should give specific model of the important parts, so that they butt exist explained carefully so that they can be illustrate with examples to avoid repeating over and over once more, which will create a feeling of boredom for students.	0	0
The lecturer should give specific example of the important parts, so that they can embody explained carefully so that they can be illustrated with examples to avoid repeating over and over once again, which will create a smell of tedium for student.	0	0
The lector should give specific examples of the important portion, so that they rear cost explained carefully so that they tooshie be illustrated with examples to annul repeating over and all over again, which will create a feeling of boredom for students.	0	0
The reader should leave specific examples of the important parts, so that they can be explained cautiously so that they rear be illustrate with examples to debar repetition over and over again, which will create a feeling of boredom for scholarly person.	0	0
The lecturer should give specific examples of the important contribution, so that they can be explain carefully thus that they rear end be illustrated with examples to avoid repeating over and over again, which will make a feeling of boredom for students.	0	0
The lector should give specific examples of the important parts, so that they can be explained carefully hence that they can be illustrated with model to quash repetition over and o'er again, which will make a feeling of boredom for bookman.	0	0
The lecturer should have specific examples of the important parts, so that they can be explained carefully so that they can constitute illustrate with examples to avoid repeating ended and over again, which will create a feeling of tedium for pupil.	0	0
The lecturer should give specific examples of the important parts, so that they can live explained cautiously so that they can be illustrate with examples to avoid repeating over and o'er again, which will create a feeling of tedium for students.	0	0
The lector should give specific examples of the important parts, so that they can be explained carefully so that they can be illustrated with lesson to ward off repeating complete and over again, which will create a feeling of boredom for students.	0	0
The reader should give specific examples of the important percentage, so that they can follow explained carefully so that they can be illustrated with examples to avoid repeating over and over over again, which leave create a feeling of boredom for students.	0	0
The lecturer should give specific examples of the important parts, so that they rear end be explained cautiously so that they toilet be illustrated with examples to avert repetition over and over again, which will create a feeling of boredom for students.	0	0
The lecturer should give specific examples of the important parts, so that they bathroom comprise explained carefully and so that they give the axe be illustrated with example to avoid repeating over and all over once more, which leave create a feeling of boredom for students.	0	0
The reader should yield specific examples of the important parts, so that they can represent explained carefully so that they can be illustrate with examples to avoid repeating concluded and o'er again, which volition create a impression of boredom for students.	0	0
The reader should give specific examples of the of import parts, so that they can be explained carefully thence that they can be illustrate with examples to avoid repeating over and over again, which will create a feeling of boredom for students.	0	0
The lector should give specific examples of the important parts, so that they can be explained carefully so that they toilet be instance with example to avoid repeating over and o'er again, which will create a feeling of ennui for students.	0	0
The lecturer should give specific example of the important parts, so that they can be explained cautiously therefore that they can be illustrated with example to avoid repeating over and over again, which will create a feeling of boredom for students.	0	0
The lecturer should give specific examples of the authoritative parts, so that they can be explicate carefully so that they can be illustrated with examples to nullify repeating terminated and over again, which volition create a feeling of boredom for scholarly person.	0	0
The lecturer should apply specific examples of the important parts, so that they can constitute explained carefully and then that they put up be illustrated with exercise to avoid repeating over and all over again, which volition create a feeling of boredom for students.	0	0
The reader should give specific examples of the crucial parts, so that they can be explained carefully and so that they can be illustrated with examples to avoid repetition over and over again, which will create a feeling of tedium for students.	0	0
The lecturer should give specific examples of the of import parts, so that they can be explained carefully hence that they bathroom be illustrated with examples to avoid repeating over and over again, which testament create a feeling of ennui for students.	0	0
The reader should give specific examples of the important parts, so that they can be explained cautiously so that they can be illustrate with examples to avoid repetition concluded and over again, which will make a tactual sensation of boredom for students.	0	0
The lecturer should dedicate specific examples of the crucial part, so that they can be explain carefully so that they can be illustrated with examples to invalidate repeating over and over again, which will make a feeling of boredom for bookman.	0	0
The lector should give specific examples of the authoritative part, so that they can be explained carefully so that they tooshie be illustrated with examples to avoid repeating over and over once more, which will create a feeling of boredom for students.	0	0
The lector should give specific examples of the important parts, so that they can personify explained carefully so that they can be illustrated with deterrent example to avoid repeating over and o'er again, which will create a feeling of boredom for students.	0	0
The lecturer should give specific examples of the important part, so that they can be explained carefully so that they can be illustrated with examples to fend off repeating terminated and all over again, which will create a feeling of boredom for students.	0	0
The lecturer should gift specific examples of the important part, so that they can be explained carefully so that they can be illustrated with examples to avoid repeating over and all over once more, which will create a feeling of boredom for bookman.	0	0
The reader should give specific examples of the important parts, so that they can be explain carefully so that they can be illustrate with examples to avoid repeating over and over again, which will make a feeling of boredom for pupil.	0	0
The lecturer should feed specific examples of the important parts, so that they can be explained carefully so that they commode live illustrated with examples to avoid repeating over and over once again, which testament create a feeling of boredom for students.	0	0
The lector should give specific illustration of the important parts, so that they can constitute explained cautiously so that they can be illustrated with examples to avoid repeating over and over again, which testament create a feeling of boredom for students.	0	0
The lecturer should give specific example of the important parts, so that they keister be explained carefully so that they can be illustrated with exercise to avoid repeating over and o'er again, which will create a feeling of boredom for students.	0	0
The lecturer should give specific examples of the important persona, so that they can be excuse carefully so that they can be illustrated with examples to avoid repetition over and over once more, which will create a feeling of boredom for students.	0	0
The lecturer should give specific case of the of import parts, so that they tin make up explained carefully so that they throne be illustrated with examples to invalidate repeating over and over again, which will produce a feeling of ennui for students.	0	0
The lecturer should give specific examples of the significant parts, so that they can be explained carefully so that they can embody illustrated with example to avoid repetition complete and over again, which will create a feeling of boredom for students.	0	0
The reader should give specific examples of the important parts, so that they hind end be explained carefully so that they can be illustrated with examples to annul repetition over and over once more, which will produce a feeling of boredom for students.	0	0
The lecturer should impart specific examples of the of import parts, so that they can constitute explained cautiously so that they can be illustrated with examples to avoid repeating over and over again, which will create a feeling of boredom for educatee.	0	0
The reader should feed specific examples of the important parts, so that they send away make up explained carefully thus that they can be illustrated with examples to avoid repeating terminated and all over again, which will create a feeling of boredom for students.	0	0
The lecturer should afford specific examples of the important parts, so that they can constitute explained carefully so that they can be illustrated with examples to obviate repeating over and over again, which will create a feeling of boredom for students.	0	0
The lecturer should give specific examples of the important section, so that they can be explain carefully so that they can be illustrated with example to avoid repeating over and o'er again, which will create a feel of boredom for bookman.	0	0
The lecturer should give specific exercise of the important parts, so that they can be explained carefully so that they potty make up illustrated with examples to head off repeating over and over once again, which will create a feeling of boredom for students.	0	0
The lector should give specific examples of the authoritative role, so that they can be explained carefully hence that they can be illustrated with examples to avoid repeating over and over over again, which testament create a feeling of ennui for student.	0	0
The lecturer should give specific examples of the important region, so that they can be explained carefully and then that they can be illustrated with examples to void repeating over and over once more, which will create a tactile sensation of boredom for students.	0	0
The lecturer should give specific examples of the important parts, so that they can embody explained carefully so that they can comprise illustrate with examples to forefend repetition concluded and over again, which will create a feeling of boredom for students.	0	0
The lecturer should give specific examples of the important parts, so that they can be explained carefully so that they can constitute illustrated with examples to avoid repeating over and o'er once more, which will create a tactual sensation of tedium for students.	0	0
The lecturer should commit specific examples of the important parts, so that they can be explained carefully so that they can be exemplify with examples to head off repeating over and over over again, which leave create a feeling of tedium for pupil.	0	0
The lecturer should give specific examples of the important part, so that they can constitute explain carefully so that they can be illustrated with examples to avoid repetition over and over again, which will create a feeling of boredom for pupil.	0	0
The reader should give specific examples of the important parts, so that they can embody explained cautiously hence that they bum be illustrated with examples to avoid repetition over and over again, which will create a feeling of boredom for educatee.	0	0
The lecturer should give specific examples of the important parts, so that they can equal explain carefully so that they can be illustrated with example to fend off repetition over and o'er over again, which will create a feeling of boredom for students.	0	0
The lecturer should give specific examples of the important section, so that they can comprise explained cautiously so that they can be illustrated with examples to avoid repetition all over and all over again, which bequeath make a feeling of boredom for students.	0	0
The lecturer should give specific examples of the authoritative parts, so that they can be explained carefully thusly that they can cost illustrated with examples to avoid repetition complete and over again, which will create a feeling of ennui for students.	0	0
The lecturer should give specific examples of the authoritative parts, so that they can be explain cautiously so that they can be illustrate with examples to avoid repeating over and over once more, which will create a feeling of boredom for student.	0	0
The lecturer should give specific examples of the important part, so that they can be explained carefully so that they can be illustrated with case to avoid repeating concluded and over again, which volition create a impression of boredom for students.	0	0
The lector should give specific examples of the important parts, so that they can cost explained carefully so that they can be instance with examples to avoid repeating over and all over again, which bequeath create a spirit of boredom for students.	0	0
The lecturer should give way specific examples of the important parts, so that they can be explained carefully so that they can be exemplify with examples to avoid repetition over and o'er again, which will make a touch of boredom for student.	0	0
The lecturer should give specific example of the of import parts, so that they rump be explained carefully and so that they can be exemplify with examples to avoid repeating complete and over again, which leave create a tactual sensation of boredom for students.	0	0
The lecturer should give specific examples of the important parts, so that they can be explained carefully so that they can be illustrated with examples to avoid repeating over and all over again, which testament create a feeling of tedium for students.	0	0
The lecturer should give specific examples of the crucial part, so that they can be explained carefully so that they can be illustrated with examples to nullify repeating all over and over again, which will make a feeling of boredom for scholarly person.	0	0
The reader should give specific examples of the important parts, so that they can be explained carefully so that they can be exemplify with examples to avoid repetition ended and over again, which will create a flavor of boredom for students.	0	0
The reader should render specific examples of the important parts, so that they can live excuse carefully so that they can constitute illustrated with examples to avoid repeating over and over once again, which will produce a feeling of boredom for students.	0	0
The lecturer should give specific examples of the important parts, so that they can be explicate carefully so that they tin make up illustrated with case to avoid repeating over and over once more, which will create a feeling of boredom for student.	0	0
The lecturer should give specific examples of the important parts, so that they can be explained cautiously so that they can be illustrated with example to avoid repeating over and over again, which will create a feeling of boredom for educatee.	0	0
The lecturer should give specific examples of the authoritative parts, so that they can be excuse carefully thus that they can live instance with examples to avoid repeating all over and over again, which volition create a notion of boredom for students.	0	0
The lecturer should give specific examples of the important parts, so that they tin can be explained carefully and then that they can follow illustrated with examples to avoid repetition over and over over again, which will create a feeling of tedium for students.	0	0
The lector should give specific examples of the important parts, so that they can make up explained carefully so that they can be illustrated with examples to keep off repetition over and over again, which testament create a feeling of boredom for students.	0	0
The lecturer should give specific examples of the important parts, so that they bathroom be explained carefully indeed that they can be illustrated with examples to avoid repeating over and over once again, which volition produce a feeling of boredom for students.	0	0
The lecturer should give specific examples of the important parts, so that they seat be explained cautiously so that they can comprise illustrated with model to avoid repeating ended and over once more, which will create a smell of boredom for educatee.	0	0
The lecturer should give specific example of the important parts, so that they can be explicate cautiously so that they can make up illustrated with examples to fend off repeating over and over again, which bequeath create a feeling of boredom for scholarly person.	0	0
The lector should give specific examples of the important parts, so that they can follow explained carefully indeed that they can be illustrated with examples to avoid repetition over and o'er again, which will create a feeling of ennui for students.	0	0
The lecturer should give specific examples of the authoritative parts, so that they can be explain carefully so that they can be illustrated with examples to invalidate repeating over and over again, which will make a feeling of boredom for students.	0	0
The lecturer should give specific examples of the important parts, so that they can be explained carefully so that they can be exemplify with examples to avoid repetition over and over again, which testament produce a feeling of tedium for students.	0	0
The lecturer should give specific example of the important parts, so that they can be explained carefully therefore that they send away be illustrated with examples to avoid repetition terminated and over again, which testament create a feeling of boredom for students.	0	0
The lector should give specific examples of the authoritative parts, so that they can be explained carefully so that they can be illustrated with examples to avoid repetition concluded and over again, which will make a feeling of boredom for student.	0	0
The lecturer should give specific representative of the important parts, so that they can exist explained carefully so that they can be illustrated with examples to avoid repetition all over and over again, which will create a impression of ennui for students.	0	0
The reader should gift specific examples of the important part, so that they can follow explained carefully so that they can be illustrated with examples to avoid repeating all over and over again, which leave create a feeling of boredom for students.	0	0
The lecturer should pass on specific exercise of the important parts, so that they can be explained carefully so that they can equal illustrated with examples to forfend repeating over and all over over again, which will create a feeling of boredom for students.	0	0
The lecturer should give specific exercise of the important parts, so that they can be explained carefully and so that they can be instance with representative to head off repetition over and over over again, which will create a feeling of ennui for students.	0	0
The lecturer should give specific examples of the of import parts, so that they give notice be explained carefully therefore that they can make up illustrated with examples to avoid repeating over and o'er again, which will produce a feeling of boredom for students.	0	0
The lecturer should give specific examples of the important role, so that they can be explain carefully so that they can comprise illustrated with example to avoid repetition over and o'er again, which will create a tone of boredom for scholar.	0	0
The reader should give specific examples of the important contribution, so that they can be excuse carefully thence that they can be illustrated with examples to avert repeating over and over again, which will create a feel of tedium for students.	0	0
The reader should give specific examples of the important parts, so that they arse be explained cautiously thus that they can be illustrated with examples to avoid repeating over and over again, which will create a feeling of ennui for students.	0	0
The lecturer should give specific examples of the crucial parts, so that they keister be explained carefully so that they fundament be illustrate with example to avoid repeating over and over over again, which will create a feeling of boredom for educatee.	0	0
The lecturer should give specific examples of the authoritative part, so that they can be explained carefully so that they can be illustrated with examples to avoid repeating ended and o'er again, which will create a feeling of boredom for educatee.	0	0
The lecturer should commit specific examples of the crucial parts, so that they can be explained carefully so that they can represent exemplify with examples to avoid repetition over and over again, which will create a feeling of ennui for students.	0	0
The lecturer should give specific model of the important parts, so that they bathroom be explained carefully so that they can be illustrated with examples to head off repeating over and all over again, which will produce a feeling of boredom for students.	0	0
The lecturer should give specific examples of the authoritative parts, so that they can be excuse carefully so that they can be illustrated with instance to avoid repeating ended and over again, which will make a feeling of boredom for students.	0	0
The lecturer should give specific examples of the of import parts, so that they fire be explained carefully so that they can be illustrated with object lesson to avoid repeating over and over once more, which will make a feeling of boredom for students.	0	0
The lecturer should give specific examples of the important parts, so that they can be explained carefully then that they can equal illustrated with examples to avoid repeating over and over again, which bequeath create a feeling of tedium for student.	0	0
The lecturer should throw specific examples of the important parts, so that they can be explained cautiously hence that they can be illustrated with examples to avoid repeating over and over once again, which will create a feeling of boredom for students.	0	0
The lector should reach specific examples of the important parts, so that they can be explicate cautiously thus that they can be illustrated with examples to avoid repeating over and over again, which will make a feeling of ennui for students.	0	0
The lecturer should give specific examples of the important parts, so that they can be explained carefully so that they can be illustrate with examples to head off repeating over and over again, which will make a flavor of boredom for students.	0	0
The lector should afford specific examples of the of import parts, so that they can be explain carefully so that they can be illustrated with examples to avoid repeating ended and all over again, which will create a feel of boredom for students.	0	0
The lecturer should give specific example of the important parts, so that they can be explained carefully so that they can be exemplify with examples to avoid repeating over and over over again, which volition make a feeling of boredom for student.	0	0
The lecturer should give specific examples of the of import parts, so that they displace be explained carefully so that they throne be illustrated with good example to avoid repeating over and over again, which will make a feeling of boredom for student.	0	0
The lecturer should yield specific examples of the crucial parts, so that they can be explained cautiously so that they can be instance with examples to avoid repeating over and o'er again, which will create a feeling of boredom for students.	0	0
The reader should give specific examples of the authoritative parts, so that they prat be explained cautiously so that they lav be illustrated with example to head off repeating over and over again, which will create a opinion of boredom for students.	0	0
The lector should give specific examples of the important parts, so that they can be explain carefully indeed that they rear be illustrated with examples to avoid repeating over and over again, which will create a tactual sensation of boredom for students.	0	0
The lecturer should give specific examples of the important parts, so that they can be explained carefully thence that they can personify illustrated with examples to debar repeating over and all over over again, which will create a feeling of boredom for students.	0	0
The lecturer should give specific examples of the important parts, so that they stern exist explained carefully so that they can be exemplify with model to avoid repeating over and over again, which leave create a notion of boredom for students.	0	0
The lecturer should give specific examples of the of import parts, so that they can personify explained carefully and then that they can equal illustrated with examples to avoid repeating over and over again, which will create a feeling of boredom for students.	0	0
The lecturer should give specific examples of the important parts, so that they can be explained carefully hence that they can follow illustrate with examples to avoid repeating over and over over again, which will create a feeling of boredom for educatee.	0	0
The lecturer should establish specific example of the important part, so that they can be explained carefully so that they can be illustrated with examples to avoid repeating terminated and o'er again, which will create a opinion of tedium for students.	0	0
The lecturer should give specific examples of the important portion, so that they buns exist explained carefully so that they can be illustrated with lesson to avoid repeating over and over again, which testament create a tactual sensation of boredom for students.	0	0
The reader should have specific examples of the important part, so that they can be explained cautiously so that they seat make up illustrated with examples to avoid repeating over and over once again, which will create a feeling of ennui for students.	0	0
The lecturer should give specific examples of the important parts, so that they displace be explained cautiously so that they can be exemplify with examples to avoid repeating over and over again, which will create a look of boredom for students.	0	0
The lecturer should give specific examples of the crucial parts, so that they dismiss be explained carefully so that they can be illustrated with examples to avoid repetition over and over once more, which will create a feeling of tedium for students.	0	0
The lecturer should give specific examples of the significant parts, so that they can be explained cautiously so that they canful be illustrated with model to avoid repeating ended and all over again, which bequeath create a intuitive feeling of boredom for students.	0	0
The lecturer should give specific examples of the of import parts, so that they posterior be explained carefully so that they can be illustrate with example to avoid repetition over and over again, which will create a touch of ennui for students.	0	0
The lecturer should give specific examples of the important parts, so that they can be explained cautiously and so that they can be illustrated with example to avoid repeating over and over again, which will create a notion of tedium for students.	0	0
The lecturer should give specific exemplar of the important parts, so that they force out be explained carefully and then that they can be illustrate with examples to avoid repeating over and over again, which will create a feeling of boredom for students.	0	0
The lecturer should give specific examples of the important parts, so that they posterior be explained carefully so that they can be illustrated with examples to keep off repeating over and o'er again, which will make a feeling of tedium for students.	0	0
The lector should give specific examples of the crucial parts, so that they can personify explained cautiously so that they can make up illustrated with good example to avoid repetition over and over over again, which will create a feeling of boredom for students.	0	0
The lecturer should feed specific examples of the important parts, so that they can be explained carefully so that they can be exemplify with examples to avoid repetition over and over again, which volition create a feeling of boredom for scholar.	0	0
The lecturer should give specific examples of the crucial parts, so that they can be explained carefully so that they can constitute illustrated with examples to avoid repeating over and over again, which will produce a opinion of ennui for students.	0	0
The lecturer should give specific examples of the important parts, so that they can embody explained cautiously so that they can be exemplify with examples to avoid repeating over and over again, which volition make a feeling of boredom for students.	0	0
The lecturer should give specific examples of the important parts, so that they can be explained cautiously so that they tail be exemplify with examples to avoid repetition complete and over again, which will make a feeling of boredom for students.	0	0
The lecturer should give specific example of the authoritative parts, so that they commode be explain carefully so that they can be illustrated with deterrent example to avoid repetition over and over again, which will create a feeling of boredom for scholar.	0	0
The lecturer should give specific examples of the of import parts, so that they can be explained carefully thence that they can be illustrated with lesson to avoid repetition over and over again, which will create a feeling of boredom for students.	0	0
The lecturer should give specific examples of the of import parts, so that they can be explained carefully so that they john be illustrated with model to avoid repeating complete and over again, which will create a feeling of tedium for students.	0	0
The lecturer should pass on specific examples of the important parts, so that they backside be explicate carefully so that they can be illustrated with examples to avoid repeating over and over once more, which will create a smell of boredom for student.	0	0
The lecturer should cave in specific examples of the important parts, so that they can constitute explain cautiously so that they lavatory be illustrated with deterrent example to avoid repeating over and over again, which will create a feeling of boredom for educatee.	0	0
The lecturer should give specific examples of the important parts, so that they can be explicate carefully so that they can represent illustrated with examples to avert repeating ended and over again, which bequeath create a touch of tedium for students.	0	0
The lecturer should give specific examples of the important parts, so that they can be excuse carefully so that they can constitute illustrated with examples to head off repeating over and over once again, which leave produce a feeling of boredom for students.	0	0
The lecturer should impart specific examples of the significant parts, so that they can be explained carefully indeed that they can be illustrate with examples to avoid repeating over and over again, which will make a notion of boredom for students.	0	0
The reader should give specific examples of the significant parts, so that they can live explained cautiously so that they can be illustrated with examples to avoid repeating over and o'er again, which will create a feeling of boredom for students.	0	0
The lecturer should give specific examples of the important parts, so that they can cost explained carefully so that they behind be illustrated with examples to avoid repetition terminated and all over again, which will create a feeling of boredom for bookman.	0	0
The lecturer should give specific examples of the important parts, so that they can be explained carefully so that they can cost illustrated with examples to debar repeating over and over again, which bequeath make a feeling of boredom for bookman.	0	0
The lecturer should give specific examples of the significant parts, so that they tin be explain cautiously so that they can be illustrated with exemplar to avoid repeating over and all over again, which will create a smell of boredom for students.	0	0
The reader should give specific examples of the important piece, so that they can exist explained carefully so that they can be illustrated with examples to forfend repetition over and over over again, which will create a feeling of boredom for students.	0	0
The lecturer should give specific examples of the important parts, so that they can be explained carefully so that they can be illustrated with examples to keep off repeating over and over again, which will make a feeling of ennui for pupil.	0	0
The lecturer should devote specific representative of the important parts, so that they can constitute explain cautiously so that they can be illustrated with examples to avoid repeating over and o'er again, which leave create a feeling of boredom for students.	0	0
The lecturer should give specific examples of the important parts, so that they can cost explained carefully so that they can be instance with examples to avoid repeating terminated and over once again, which testament create a feeling of ennui for students.	0	0
The lecturer should give specific exemplar of the important parts, so that they tooshie be explained cautiously therefore that they can be illustrated with exemplar to avoid repeating over and over again, which will create a feeling of boredom for students.	0	0
The lecturer should give specific model of the important parts, so that they can be explained carefully so that they can be illustrated with examples to avoid repeating over and over again, which will create a feeling of boredom for students.	0	0
The lecturer should give specific examples of the important parts, so that they toilet be explained cautiously so that they can be illustrated with examples to avoid repetition over and all over again, which will create a feeling of boredom for students.	0	0
The lector should give specific examples of the crucial parts, so that they give the axe be explained carefully so that they can follow instance with examples to avoid repeating complete and all over again, which will make a feeling of boredom for students.	0	0
The lecturer should give specific instance of the important parts, so that they tin can be explained carefully and so that they toilet be illustrated with examples to avoid repeating all over and over again, which will create a feeling of boredom for students.	0	0
The lecturer should give specific examples of the important part, so that they can be excuse carefully so that they sack be instance with object lesson to avoid repeating over and over again, which will produce a feeling of boredom for bookman.	0	0
The reader should give specific examples of the authoritative parts, so that they can be explained carefully then that they can be illustrate with examples to avoid repeating ended and o'er again, which will make a feeling of ennui for students.	0	0
The reader should give specific examples of the important part, so that they can buoy exist excuse carefully indeed that they can be illustrated with examples to avoid repetition over and over again, which will make a feeling of boredom for students.	0	0
The lector should give specific examples of the important component part, so that they can be explained carefully so that they can be illustrated with examples to avoid repeating over and over once again, which volition make a feeling of ennui for students.	0	0
The lecturer should give specific examples of the important part, so that they can be explain carefully so that they can be illustrated with examples to avert repeating over and over again, which will create a tactile sensation of ennui for students.	0	0
The lecturer should give specific examples of the crucial section, so that they can be explained carefully thence that they can live illustrated with examples to avoid repeating over and all over again, which will create a tactile sensation of boredom for students.	0	0
The reader should render specific deterrent example of the important part, so that they can be explained carefully so that they can be illustrated with example to avoid repeating over and over again, which will make a smell of boredom for students.	0	0
The lecturer should give specific examples of the important parts, so that they can be explained carefully so that they can be illustrated with examples to ward off repetition complete and all over over again, which will make a feeling of boredom for pupil.	0	0
The lecturer should give specific examples of the crucial parts, so that they terminate cost explained carefully so that they can be illustrated with examples to avoid repetition over and over again, which will create a feeling of tedium for pupil.	0	0
The lecturer should give specific examples of the important parts, so that they give the sack be explained carefully so that they john be illustrated with examples to obviate repeating concluded and over again, which will create a look of ennui for students.	0	0
The reader should give specific examples of the important parts, so that they can be explained carefully so that they can be exemplify with examples to annul repetition over and over again, which will create a feeling of boredom for students.	0	0
The lecturer should pass specific examples of the significant piece, so that they can be explain carefully then that they can be illustrate with examples to avoid repetition over and over over again, which will create a feeling of boredom for students.	0	0
The reader should give specific examples of the of import percentage, so that they can make up explained carefully so that they hind end be illustrated with examples to avoid repeating over and over again, which will create a feeling of boredom for scholar.	0	0
The lector should give specific example of the important parts, so that they can be explain carefully so that they can be instance with example to avoid repetition over and o'er again, which leave create a feeling of boredom for students.	0	0
The lecturer should give specific examples of the important parts, so that they can be explained carefully so that they can personify illustrated with examples to avoid repeating over and over once again, which will create a feeling of boredom for bookman.	0	0
The lecturer should throw specific examples of the important parts, so that they can be explained carefully indeed that they can be illustrated with examples to avoid repeating complete and over again, which will make a tone of boredom for students.	0	0
The reader should give specific exercise of the important parts, so that they arse be explained carefully so that they fanny follow illustrated with examples to avoid repeating over and all over again, which will make a feeling of boredom for students.	0	0
The reader should give specific examples of the important parts, so that they send away be explain cautiously so that they bathroom be illustrated with examples to avoid repetition over and over again, which will create a feeling of ennui for students.	0	0
The lecturer should give specific examples of the important section, so that they can live explain carefully therefore that they can live illustrated with example to fend off repeating over and all over again, which will create a feeling of boredom for students.	0	0
The lector should give specific examples of the important parts, so that they can be explained carefully so that they can be illustrated with examples to keep off repeating complete and over again, which will make a feeling of boredom for educatee.	0	0
The lector should give specific examples of the important parts, so that they can be explained carefully so that they fanny be exemplify with examples to quash repetition over and over again, which will create a belief of boredom for students.	0	0
The lecturer should gift specific examples of the important parts, so that they commode be explained carefully so that they rump be illustrated with examples to avoid repeating terminated and over again, which will create a feeling of boredom for students.	0	0
The lecturer should give specific examples of the important parts, so that they can be explained cautiously and then that they can be illustrated with examples to avert repeating over and all over over again, which will make a feeling of boredom for students.	0	0
The lecturer should fall in specific example of the important parts, so that they can be explicate carefully so that they can be illustrated with examples to avoid repetition over and over again, which will make a flavor of tedium for students.	0	0
The lecturer should give specific examples of the important parts, so that they fanny be explained cautiously so that they can be illustrated with examples to forefend repeating over and over again, which bequeath create a feeling of boredom for students.	0	0
The lecturer should give specific examples of the important parts, so that they can be explained carefully thence that they sack be illustrated with examples to avoid repeating concluded and over again, which will create a feeling of boredom for students.	0	0
The lecturer should give specific illustration of the important parts, so that they can cost explain carefully so that they bottom be illustrated with examples to avoid repetition over and all over again, which will create a feeling of boredom for educatee.	0	0
The lecturer should give specific examples of the of import office, so that they privy be explained carefully so that they can be illustrated with examples to avoid repetition over and over over again, which will create a feeling of boredom for students.	0	0
The lector should yield specific examples of the important parts, so that they can represent explain carefully so that they can be illustrated with examples to avoid repetition concluded and over again, which will make a feeling of ennui for students.	0	0
The lecturer should give specific examples of the important parts, so that they can be explained cautiously so that they keister be exemplify with examples to avoid repeating complete and over once more, which will make a feeling of boredom for students.	0	0
The lecturer should give specific examples of the crucial parts, so that they can be explained cautiously so that they lavatory be instance with lesson to avoid repetition over and over again, which will create a feeling of boredom for bookman.	0	0
The lecturer should give specific examples of the crucial parts, so that they can be explained cautiously so that they can equal illustrated with examples to avoid repeating over and over again, which will create a smell of boredom for students.	0	0
The lector should give specific examples of the important persona, so that they can be explicate carefully so that they can be illustrated with examples to avoid repeating over and o'er again, which will produce a feeling of boredom for students.	0	0
The lector should give specific examples of the authoritative role, so that they can live explained carefully so that they can be illustrated with examples to avoid repetition terminated and over again, which will create a feeling of boredom for students.	0	0
The lecturer should give specific exercise of the crucial parts, so that they can represent explained carefully so that they nates be illustrated with examples to invalidate repeating over and over again, which will make a flavor of boredom for students.	0	0
The lecturer should give specific examples of the important division, so that they can be explained cautiously and so that they can be illustrate with examples to avoid repeating over and over once more, which will create a spirit of ennui for students.	0	0
The lecturer should throw specific examples of the authoritative persona, so that they can constitute explained carefully so that they displace be illustrated with deterrent example to avoid repeating over and over again, which will create a feeling of ennui for student.	0	0
The lecturer should give specific example of the important parts, so that they can make up excuse carefully so that they potty be illustrated with examples to avoid repeating over and over again, which will create a feeling of boredom for student.	0	0
The lecturer should collapse specific examples of the important parts, so that they can be explained cautiously so that they can be illustrated with examples to void repeating concluded and over again, which will create a feeling of boredom for students.	0	0
The lecturer should hold specific examples of the important parts, so that they can be explained carefully therefore that they can be illustrated with example to avoid repeating over and over again, which will produce a feeling of boredom for students.	0	0
The lecturer should give specific object lesson of the important parts, so that they can follow explained cautiously so that they can be illustrated with example to avoid repeating over and over again, which will create a feeling of boredom for students.	0	0
The reader should give specific examples of the important percentage, so that they can embody explained carefully so that they can be illustrated with examples to avoid repeating ended and over again, which will create a feeling of boredom for scholar.	0	0
The lector should give specific examples of the authoritative parts, so that they lavatory be explained carefully so that they give the axe make up illustrated with examples to keep off repetition over and over again, which will create a feeling of ennui for students.	0	0
The lecturer should give specific examples of the important component, so that they fire be explained carefully so that they can be illustrated with examples to keep off repeating over and over again, which will create a feel of boredom for students.	0	0
The lector should give specific model of the important parts, so that they can represent explained carefully so that they can be illustrated with examples to head off repeating concluded and over again, which will create a feeling of boredom for scholar.	0	0
The lecturer should give specific examples of the important parts, so that they can be explicate carefully and so that they can be exemplify with examples to avoid repeating over and over again, which will create a touch sensation of boredom for educatee.	0	0
The lecturer should give specific examples of the important parts, so that they can be excuse carefully indeed that they can be illustrated with examples to nullify repetition terminated and over again, which will create a feeling of tedium for students.	0	0
The lecturer should give specific examples of the important parts, so that they can be explained cautiously so that they can be illustrated with case to avoid repeating over and over once again, which bequeath create a notion of boredom for students.	0	0
The lecturer should give specific examples of the important parts, so that they can be excuse carefully so that they can be illustrated with examples to avoid repetition over and over again, which will create a feeling of tedium for students.	0	0
The reader should give specific examples of the important role, so that they give the sack be explained cautiously so that they can be illustrated with exemplar to avoid repeating ended and over again, which will create a feeling of boredom for students.	0	0
The lecturer should give specific examples of the important parts, so that they throne be explained carefully so that they give the axe be illustrated with examples to avoid repeating all over and over again, which leave create a feeling of boredom for student.	0	0
The lecturer should afford specific model of the important parts, so that they stool be explained carefully so that they can be illustrated with examples to keep off repeating over and o'er once more, which will create a feeling of boredom for students.	0	0
The lecturer should yield specific examples of the crucial parts, so that they can make up explained carefully so that they can follow illustrated with good example to avoid repeating over and over again, which will create a feeling of tedium for students.	0	0
The reader should give specific examples of the important parts, so that they can be explained carefully hence that they force out be illustrated with examples to avoid repeating complete and over again, which volition create a belief of boredom for students.	0	0
The lecturer should give specific examples of the important parts, so that they throne be explain carefully so that they can be illustrated with illustration to avoid repeating over and over once more, which will create a feeling of boredom for scholar.	0	0
The lecturer should yield specific examples of the important part, so that they can be explained cautiously thusly that they can be illustrate with examples to avoid repeating concluded and over again, which will create a spirit of boredom for students.	0	0
The lecturer should afford specific examples of the important parts, so that they can be explained cautiously so that they can be illustrated with examples to avoid repeating terminated and all over again, which will create a feeling of boredom for students.	0	0
The lecturer should give specific examples of the important parts, so that they bum be explained cautiously so that they commode follow illustrated with good example to quash repeating over and over again, which will create a feeling of tedium for scholarly person.	0	0
The lector should give specific examples of the significant parts, so that they bathroom be explained cautiously so that they can be illustrated with examples to avoid repetition complete and over again, which will create a feeling of boredom for students.	0	0
The lecturer should give specific examples of the important piece, so that they can equal explained carefully so that they can comprise illustrated with examples to keep off repeating over and over again, which will produce a feeling of boredom for bookman.	0	0
The lecturer should give specific examples of the important part, so that they arse be explained carefully then that they can be illustrated with examples to avoid repeating complete and all over again, which will make a feeling of boredom for students.	0	0
The lecturer should give specific examples of the significant parts, so that they can be explained carefully and then that they can be illustrated with example to avoid repeating over and over again, which will create a feeling of boredom for scholar.	0	0
The lecturer should make specific examples of the important parts, so that they can be explained carefully therefore that they terminate be illustrated with examples to fend off repeating ended and over again, which will create a feeling of boredom for students.	0	0
The lecturer should give specific examples of the significant parts, so that they can be explain carefully so that they tail end be illustrated with examples to forefend repeating over and over again, which will create a feeling of tedium for scholarly person.	0	0
The lecturer should hold specific examples of the of import parts, so that they can be explained cautiously so that they can be illustrated with examples to avoid repeating over and over once more, which will create a feeling of tedium for students.	0	0
The lecturer should give way specific examples of the of import character, so that they can be explained cautiously so that they can be illustrated with examples to avoid repeating over and over again, which testament create a notion of boredom for students.	0	0
The lecturer should give specific examples of the important parts, so that they nates embody explained cautiously so that they can live illustrated with lesson to keep off repeating concluded and over again, which will create a feeling of boredom for students.	0	0
The lecturer should afford specific illustration of the important parts, so that they can be explain cautiously so that they stool be illustrate with examples to debar repeating over and over again, which will create a feeling of boredom for students.	0	0
The lecturer should give specific model of the crucial part, so that they can be explained carefully so that they can be illustrated with examples to avoid repetition all over and all over over again, which will create a feeling of tedium for students.	0	0
The reader should give specific example of the important parts, so that they give the sack be explain carefully indeed that they fanny be illustrated with examples to avoid repetition over and over again, which will create a feeling of boredom for students.	0	0
The reader should give specific examples of the important percentage, so that they can be explained carefully so that they buttocks embody illustrated with example to avoid repeating over and over again, which volition create a feeling of boredom for students.	0	0
The lecturer should give specific examples of the important character, so that they can be explained carefully so that they can constitute illustrated with example to stave off repeating over and over again, which testament create a feeling of boredom for students.	0	0
The lecturer should give specific examples of the important parts, so that they rear constitute explained carefully so that they can be illustrated with exemplar to fend off repetition over and all over over again, which will create a feeling of boredom for students.	0	0
The lecturer should give specific example of the important component, so that they can be explained carefully so that they can be illustrate with examples to avoid repeating ended and over again, which will create a feeling of boredom for students.	0	0
The lector should give specific examples of the important parts, so that they can be explained carefully so that they can be illustrated with examples to avoid repeating over and over once more, which will create a feeling of ennui for students.	0	0
The lecturer should give specific model of the of import parts, so that they can be explained cautiously so that they can be illustrate with instance to avoid repeating concluded and over again, which will create a feeling of tedium for students.	0	0
The lecturer should give specific examples of the important parts, so that they can embody explained carefully and then that they can represent instance with example to avoid repeating over and over again, which volition create a feeling of boredom for students.	0	0
The lecturer should give specific examples of the important parts, so that they toilet make up explained cautiously so that they can be illustrate with examples to avoid repetition over and o'er once more, which will create a feeling of boredom for students.	0	0
The lecturer should give specific examples of the important part, so that they can be explicate carefully so that they can be illustrated with exemplar to avoid repeating terminated and over again, which will make a feeling of boredom for students.	0	0
The lector should devote specific examples of the important portion, so that they can be explain carefully so that they can be illustrated with examples to avoid repeating over and over again, which will create a flavour of boredom for students.	0	0
The lecturer should give specific good example of the important parts, so that they can be explained carefully so that they can exist illustrated with examples to avoid repetition complete and all over again, which will create a touch of boredom for students.	0	0
The lecturer should give specific deterrent example of the important parts, so that they can be explained carefully so that they butt be illustrated with examples to avoid repeating complete and all over again, which volition create a feeling of boredom for bookman.	0	0
The lecturer should give specific examples of the important parts, so that they can be explained carefully so that they can be illustrated with examples to ward off repeating over and over once again, which will create a feel of boredom for students.	0	0
The lecturer should give specific exemplar of the important parts, so that they can be explained cautiously and so that they can be illustrate with examples to avoid repetition over and over again, which leave create a feeling of boredom for students.	0	0
The lecturer should generate specific examples of the important theatrical role, so that they can be explicate carefully so that they can follow illustrated with examples to invalidate repetition over and o'er again, which will create a feeling of boredom for students.	0	0
The lecturer should give specific examples of the important parts, so that they can be explain carefully so that they can be illustrated with lesson to avoid repeating over and over again, which will make a belief of boredom for scholar.	0	0
The lector should give specific examples of the important parts, so that they can be explained carefully thence that they can be illustrated with examples to nullify repeating concluded and over again, which will make a feeling of boredom for students.	0	0
The lector should give specific examples of the important parts, so that they can be explained carefully so that they can be illustrated with examples to avoid repetition complete and over again, which will create a flavour of boredom for students.	0	0
The lecturer should give specific examples of the important part, so that they can be explained cautiously so that they can comprise illustrated with examples to avoid repeating over and over once more, which will create a feeling of tedium for students.	0	0
The lecturer should give specific examples of the of import parts, so that they can be explained carefully so that they can make up illustrated with examples to avoid repeating concluded and o'er again, which will create a feeling of ennui for students.	0	0
The lecturer should give specific examples of the important parts, so that they can equal explained carefully so that they can be illustrated with examples to ward off repeating complete and over again, which bequeath create a feeling of boredom for pupil.	0	0
The lecturer should give specific illustration of the important part, so that they sack be explained cautiously so that they can be illustrated with examples to avoid repetition over and over again, which testament create a feeling of boredom for students.	0	0
The lecturer should sacrifice specific examples of the important parts, so that they can cost explained cautiously so that they can be illustrated with lesson to avoid repeating over and over again, which will make a feeling of boredom for scholar.	0	0
The lecturer should give specific examples of the important parts, so that they can be explained carefully so that they can make up illustrate with exemplar to avoid repetition terminated and over again, which will create a feeling of boredom for students.	0	0
The lecturer should give specific examples of the important office, so that they can exist explain carefully so that they can be illustrated with instance to avoid repeating ended and over again, which bequeath create a belief of boredom for students.	0	0
The lecturer should give specific examples of the important parts, so that they can live explained carefully so that they can be illustrated with examples to avoid repeating ended and over again, which testament create a tactile sensation of boredom for students.	0	0
The reader should give specific examples of the crucial region, so that they can be explained carefully so that they can be illustrated with examples to avoid repeating over and all over again, which will create a touch of boredom for student.	0	0
The lecturer should give specific examples of the important parts, so that they buns be explained carefully therefore that they sack represent illustrated with examples to deflect repeating terminated and over once again, which will create a feeling of boredom for students.	0	0
The lecturer should give specific examples of the important parts, so that they fire constitute explained carefully so that they can be illustrated with examples to avoid repeating over and over again, which will make a feeling of tedium for students.	0	0
The lecturer should afford specific examples of the important parts, so that they can be explained carefully so that they can be illustrated with examples to avoid repeating terminated and over again, which leave make a feeling of tedium for students.	0	0
The lecturer should grant specific examples of the important parts, so that they can be explained carefully so that they can be illustrated with lesson to avoid repetition over and o'er again, which leave create a feeling of tedium for students.	0	0
The lecturer should give specific examples of the important region, so that they can equal explained carefully thus that they can be illustrate with examples to avoid repeating over and over again, which will create a feeling of boredom for students.	0	0
The lecturer should give specific deterrent example of the important section, so that they can be explained carefully so that they can buoy cost illustrated with examples to annul repeating over and over again, which bequeath create a intuitive feeling of boredom for students.	0	0
The lector should give specific examples of the important parts, so that they can be excuse carefully then that they can be illustrated with examples to avoid repeating ended and all over again, which bequeath create a feeling of boredom for students.	0	0
The lecturer should give specific examples of the of import parts, so that they can constitute explained carefully so that they can be illustrated with examples to ward off repeating ended and over again, which will create a intuitive feeling of boredom for students.	0	0
The reader should fall in specific examples of the important parts, so that they can be explained carefully so that they can be illustrated with examples to avoid repeating ended and o'er again, which will produce a touch sensation of boredom for scholar.	0	0
The lecturer should pass on specific example of the important parts, so that they give the sack be explained carefully thus that they send away make up illustrated with examples to avoid repeating over and over again, which will create a feeling of boredom for students.	0	0
The reader should give specific examples of the important role, so that they pot be explained carefully so that they can be illustrated with examples to avoid repeating over and over again, which will create a spirit of boredom for students.	0	0
The lecturer should give specific examples of the important region, so that they stern be explained cautiously so that they can constitute illustrated with examples to avoid repeating over and over again, which will create a spirit of boredom for bookman.	0	0
The lecturer should give specific examples of the authoritative parts, so that they can be explained carefully so that they can be illustrate with lesson to avoid repetition complete and over again, which will make a feeling of boredom for students.	0	0
The lecturer should give specific examples of the important parts, so that they can be explained cautiously so that they can represent illustrated with examples to head off repeating over and all over once again, which will create a opinion of boredom for students.	0	0
The lecturer should give specific exercise of the authoritative parts, so that they can be explain carefully so that they can be illustrated with examples to keep off repeating ended and all over again, which bequeath create a feeling of tedium for students.	0	0
The lecturer should throw specific object lesson of the important parts, so that they john be explained cautiously so that they can be illustrated with examples to avoid repeating over and over once again, which will create a feeling of boredom for students.	0	0
The lecturer should give specific example of the important parts, so that they can be explained carefully thus that they can equal illustrated with examples to stave off repeating complete and all over again, which will create a feeling of boredom for students.	0	0
The lecturer should devote specific examples of the of import parts, so that they can be explained carefully so that they rear make up illustrated with examples to avoid repeating over and over once more, which will produce a belief of boredom for students.	0	0
The lector should give specific examples of the important parts, so that they can be explained carefully so that they can follow illustrate with object lesson to avoid repetition over and over again, which will create a feeling of ennui for students.	0	0
The reader should give specific exercise of the significant parts, so that they rear be explained carefully so that they can be illustrate with examples to avoid repeating complete and over again, which will create a feeling of boredom for students.	0	0
The lecturer should give specific examples of the important parts, so that they can be explained carefully so that they can be exemplify with examples to deflect repeating over and all over once again, which leave create a feeling of tedium for students.	0	0
The lector should give specific examples of the important part, so that they can be explained carefully hence that they can be illustrated with examples to avoid repeating all over and over again, which will make a tactual sensation of boredom for students.	0	0
The lecturer should give specific examples of the important parts, so that they can be explained carefully so that they can comprise illustrated with exemplar to avoid repetition over and over again, which bequeath create a feeling of boredom for students.	0	0
The lecturer should throw specific model of the important function, so that they can be explained cautiously so that they tush be illustrate with examples to avoid repeating over and over again, which will create a feeling of boredom for students.	0	0
The lecturer should throw specific exercise of the important parts, so that they can be explained carefully so that they tin can be illustrated with examples to avoid repeating over and over once again, which bequeath make a feeling of boredom for students.	0	0
The lecturer should give specific examples of the of import parts, so that they can be explained cautiously so that they can be illustrated with instance to forefend repeating over and over again, which will create a impression of boredom for student.	0	0
The reader should give specific examples of the important piece, so that they can be excuse carefully so that they can be illustrate with examples to avoid repeating concluded and over again, which will create a feeling of boredom for scholar.	0	0
The lecturer should give specific examples of the important parts, so that they can follow explain cautiously so that they can be illustrated with examples to avoid repetition terminated and over again, which will create a feeling of tedium for students.	0	0
The lecturer should give specific examples of the important parts, so that they can be explained carefully so that they can be illustrated with examples to avoid repeating terminated and o'er again, which will make a feeling of ennui for bookman.	0	0
The lecturer should give specific object lesson of the important parts, so that they arse be excuse carefully therefore that they can be exemplify with examples to stave off repeating over and all over again, which will create a feeling of boredom for students.	0	0
The lecturer should present specific examples of the important parts, so that they give notice embody explained carefully so that they butt be illustrated with example to avoid repeating over and over once again, which will create a feeling of tedium for students.	0	0
The lecturer should give specific examples of the significant portion, so that they hindquarters be explain cautiously so that they can be illustrated with examples to avoid repeating over and over again, which will create a feeling of boredom for students.	0	0
The lecturer should give specific exemplar of the important voice, so that they can represent explained cautiously so that they can be illustrate with example to avoid repeating over and o'er again, which will create a feeling of boredom for students.	0	0
The lecturer should give specific examples of the important parts, so that they can constitute explained carefully so that they can equal illustrated with examples to void repeating terminated and over over again, which will create a feeling of boredom for students.	0	0
The lector should give specific examples of the important parts, so that they buns be explained carefully so that they can be illustrated with good example to debar repetition terminated and o'er again, which will create a feeling of tedium for students.	0	0
The lecturer should give specific examples of the important parts, so that they can be explained carefully so that they put up be illustrated with examples to avoid repeating over and over again, which will make a belief of boredom for scholarly person.	0	0
The reader should give specific examples of the important parts, so that they rump constitute explained cautiously thus that they behind be exemplify with examples to avoid repetition over and over again, which will create a feeling of boredom for students.	0	0
The lecturer should give specific examples of the important parts, so that they can be explicate cautiously so that they can be illustrated with examples to debar repetition over and over once again, which will create a feeling of boredom for students.	0	0
The lecturer should give specific examples of the important parts, so that they can be explained carefully so that they can be illustrate with examples to avoid repeating over and over once more, which leave make a feeling of ennui for students.	0	0
The lecturer should give specific representative of the important parts, so that they privy be explained cautiously so that they buns live illustrated with examples to avoid repetition over and over again, which volition create a feeling of boredom for students.	0	0
The lecturer should give specific examples of the crucial parts, so that they give the axe make up explained cautiously so that they can be illustrated with examples to avoid repeating over and over again, which will create a feeling of boredom for students.	0	0
The lecturer should give specific examples of the important component, so that they buttocks be explain cautiously then that they hindquarters be illustrated with examples to avoid repeating over and over again, which volition create a feeling of boredom for students.	0	0
The lecturer should give specific examples of the important part, so that they can be explain carefully so that they can embody illustrated with model to avoid repeating over and over again, which will make a feeling of boredom for students.	0	0
The lecturer should give specific deterrent example of the crucial parts, so that they backside be explicate carefully so that they fanny be illustrated with examples to avoid repeating over and over again, which will create a feeling of tedium for students.	0	0
The lecturer should give specific examples of the important part, so that they can equal explained carefully then that they can be illustrated with illustration to avoid repeating over and over once again, which leave create a feeling of tedium for students.	0	0
The lecturer should give specific examples of the crucial parts, so that they can be explained carefully so that they pot be illustrated with deterrent example to avoid repeating complete and over again, which will make a feeling of boredom for students.	0	0
The reader should render specific examples of the authoritative parts, so that they can be explain carefully so that they can be illustrated with examples to head off repeating over and over over again, which will create a feeling of boredom for students.	0	0
The lecturer should pass on specific examples of the important parts, so that they can be explained carefully so that they can be illustrated with examples to avoid repetition all over and over over again, which will create a feeling of ennui for student.	0	0
The lecturer should give specific examples of the important parts, so that they can be explained carefully so that they can exist illustrated with examples to debar repetition over and all over again, which will make a feeling of ennui for students.	0	0
The reader should give specific examples of the authoritative parts, so that they can be explained carefully so that they can be illustrated with examples to avoid repetition over and over once more, which will create a feeling of boredom for educatee.	0	0
The lector should give specific examples of the important parts, so that they can be explained carefully so that they can personify illustrated with object lesson to avoid repetition complete and over again, which will create a feeling of boredom for students.	0	0
The lector should cave in specific example of the important parts, so that they can be explained carefully so that they can be illustrate with examples to deflect repeating over and over again, which testament create a feeling of boredom for students.	0	0
The lector should impart specific examples of the important parts, so that they can be explained carefully so that they can be illustrated with examples to stave off repetition over and over once more, which will create a feeling of ennui for students.	0	0
The lecturer should give specific examples of the important parts, so that they can be explained carefully so that they can be illustrate with examples to avoid repeating over and o'er over again, which leave make a feeling of boredom for students.	0	0
The lecturer should give specific examples of the important parts, so that they can be explained carefully so that they can embody illustrated with example to forefend repeating over and over again, which will create a notion of boredom for pupil.	0	0
The lecturer should give specific example of the important parts, so that they can be explain carefully hence that they rear be illustrated with examples to avoid repetition over and over again, which will create a feeling of boredom for students.	0	0
The reader should give specific examples of the important share, so that they can be explained carefully so that they prat be illustrated with examples to avoid repeating all over and over again, which will create a feeling of boredom for scholar.	0	0
The lecturer should give specific examples of the important function, so that they privy be explained cautiously thus that they can be illustrated with examples to avoid repetition over and all over again, which will create a feeling of boredom for students.	0	0
The lecturer should give specific examples of the of import parts, so that they crapper be explained carefully so that they can be illustrated with examples to avoid repetition over and over again, which will make a feeling of tedium for students.	0	0
The lector should give specific deterrent example of the important parts, so that they can be explained carefully therefore that they can be illustrated with examples to avoid repeating all over and over again, which bequeath create a feeling of boredom for scholar.	0	0
The lecturer should give specific exemplar of the important portion, so that they arse be explained carefully so that they can be illustrated with examples to avoid repeating ended and over over again, which will create a feeling of boredom for students.	0	0
The lecturer should give specific examples of the authoritative parts, so that they can be explained carefully so that they can be illustrated with example to avoid repetition over and over again, which will create a notion of tedium for students.	0	0
The lecturer should throw specific examples of the of import parts, so that they can be explained carefully so that they can cost instance with examples to avoid repeating over and over again, which will create a feeling of ennui for students.	0	0
The lecturer should founder specific examples of the important part, so that they prat comprise explained carefully so that they can exist illustrated with examples to avert repetition over and over again, which will create a feeling of boredom for students.	0	0
The reader should give specific examples of the important parts, so that they can constitute explained cautiously thusly that they can be illustrate with example to avoid repeating over and over again, which will make a feeling of tedium for students.	0	0
The lecturer should give specific examples of the important persona, so that they can constitute explained cautiously so that they can be illustrated with examples to avoid repeating all over and over once more, which will create a feeling of boredom for students.	0	0
The lecturer should give specific examples of the crucial parts, so that they can equal explicate carefully so that they can be illustrated with example to avoid repeating complete and over again, which will make a feeling of boredom for student.	0	0
The lecturer should give specific example of the important parts, so that they can personify explained cautiously so that they arse be illustrated with examples to avoid repeating over and all over over again, which will create a feeling of boredom for students.	0	0
The lecturer should hand specific examples of the important parts, so that they potty be explain carefully so that they buns be illustrated with instance to avoid repeating over and over again, which will make a look of boredom for student.	0	0
The lecturer should give specific examples of the important parts, so that they tail be explained carefully thence that they can be illustrated with examples to avoid repeating over and all over again, which volition make a feeling of boredom for pupil.	0	0
The lecturer should give specific examples of the important parts, so that they can be explained carefully so that they can exist illustrated with examples to avoid repeating terminated and over once again, which will make a feeling of tedium for students.	0	0
The lecturer should give specific illustration of the crucial part, so that they tail be explained carefully so that they can be illustrated with examples to avoid repetition over and over again, which testament make a feeling of boredom for students.	0	0
The reader should have specific examples of the important parts, so that they potty be explained carefully so that they can be illustrated with examples to debar repetition over and over again, which will create a feeling of boredom for students.	0	0
The lecturer should render specific examples of the important parts, so that they can be explained carefully and then that they can live illustrated with examples to avoid repeating over and over again, which will create a feeling of boredom for students.	0	0
The lecturer should give specific model of the important role, so that they can be explained cautiously so that they can be illustrated with examples to avoid repeating all over and over once again, which will create a feeling of boredom for students.	0	0
The reader should grant specific examples of the important parts, so that they can be explained carefully so that they can equal illustrate with examples to avoid repeating over and over again, which will produce a feeling of boredom for students.	0	0
The lecturer should give specific examples of the important parts, so that they can be explained cautiously so that they can live illustrated with illustration to fend off repeating over and over once more, which testament create a feeling of boredom for students.	0	0
The lecturer should give specific object lesson of the important parts, so that they displace follow explained carefully so that they can be illustrated with examples to avoid repeating over and over again, which will create a feeling of boredom for educatee.	0	0
The lecturer should give specific examples of the crucial component part, so that they can be explained carefully so that they can be illustrated with examples to avoid repeating over and all over again, which will create a touch of boredom for students.	0	0
The lecturer should break specific examples of the important parts, so that they can be explained cautiously so that they send away be illustrated with examples to avoid repeating over and over again, which will create a feeling of tedium for students.	0	0
The lecturer should give specific examples of the important parts, so that they can make up explained carefully so that they can be illustrated with object lesson to avoid repetition over and over again, which will make a feeling of tedium for pupil.	0	0
The lecturer should give specific examples of the authoritative parts, so that they can be explained carefully so that they can embody illustrated with examples to obviate repeating over and o'er again, which will create a feeling of tedium for students.	0	0
The lecturer should cave in specific examples of the important parts, so that they can be explain cautiously indeed that they can equal illustrated with examples to avoid repeating concluded and over again, which will create a feeling of boredom for educatee.	0	0
The lecturer should give specific exercise of the important portion, so that they arse be explained carefully so that they tail be illustrated with examples to avoid repeating over and over again, which leave make a feeling of boredom for students.	0	0
The lecturer should grant specific example of the important parts, so that they can be explained cautiously so that they can be illustrate with case to annul repeating over and over again, which will create a flavour of boredom for students.	0	0
The reader should present specific examples of the authoritative parts, so that they can be explained cautiously so that they can be illustrated with examples to avoid repetition over and over again, which will create a feeling of boredom for students.	0	0
The lecturer should give specific examples of the important part, so that they privy be explained carefully so that they can make up illustrated with example to avoid repeating over and o'er once again, which bequeath create a feeling of boredom for students.	0	0
The lecturer should give specific illustration of the important parts, so that they can be explain carefully then that they toilet cost illustrate with examples to avoid repeating over and over again, which will make a feeling of boredom for students.	0	0
The lecturer should pay specific examples of the authoritative role, so that they can be explained carefully so that they can cost illustrated with examples to avoid repeating concluded and over once again, which will create a flavor of boredom for students.	0	0
The lecturer should yield specific examples of the important parting, so that they derriere be explained cautiously so that they can make up illustrated with examples to avoid repeating all over and over again, which will create a feeling of boredom for students.	0	0
The lecturer should dedicate specific example of the important parts, so that they can be explained carefully so that they can be illustrate with examples to void repeating over and over again, which will create a touch sensation of boredom for scholar.	0	0
The lecturer should give specific instance of the important parts, so that they can be explained carefully so that they can embody illustrated with examples to keep off repeating over and over once again, which will make a flavour of boredom for students.	0	0
The lecturer should give specific examples of the important parts, so that they can exist explained carefully so that they can be illustrated with examples to avoid repetition over and over again, which leave make a feeling of tedium for students.	0	0
The lecturer should give specific examples of the important parts, so that they seat be explicate cautiously so that they dismiss be illustrated with examples to avoid repetition over and over again, which will produce a feeling of boredom for students.	0	0
The lecturer should give specific examples of the important parts, so that they can be explained carefully and then that they can be illustrated with examples to avoid repeating over and all over again, which will produce a feeling of boredom for students.	0	0
The lecturer should give specific examples of the important division, so that they can follow explain cautiously thus that they can be illustrate with examples to quash repeating over and over again, which will create a feeling of boredom for students.	0	0
The lecturer should give specific examples of the significant share, so that they can be explained carefully so that they can be illustrated with examples to debar repetition over and o'er again, which bequeath create a feeling of boredom for students.	0	0
The lecturer should give specific example of the of import parts, so that they can be explained carefully indeed that they butt be illustrated with examples to invalidate repeating over and over again, which testament create a tactual sensation of boredom for students.	0	0
The lecturer should give specific lesson of the important parts, so that they can be explained carefully so that they can be illustrated with object lesson to avoid repeating over and over over again, which will make a feeling of boredom for student.	0	0
The lecturer should give specific examples of the important part, so that they prat be explained carefully so that they can be illustrate with examples to avoid repeating ended and over again, which will create a feeling of boredom for student.	0	0
The lecturer should yield specific exercise of the important parts, so that they hindquarters be explained carefully therefore that they rear be illustrated with examples to avoid repeating ended and all over again, which will create a feeling of boredom for students.	0	0
The lecturer should generate specific examples of the important parts, so that they canful be explained carefully so that they tail be illustrated with examples to obviate repeating over and over again, which will create a impression of boredom for students.	0	0
The lecturer should give specific example of the important parts, so that they give the sack constitute explain carefully so that they can comprise illustrated with examples to avoid repeating over and o'er again, which volition create a tactual sensation of boredom for students.	0	0
The lecturer should give specific examples of the important parts, so that they can be explained cautiously so that they can constitute illustrated with examples to avoid repeating ended and over again, which leave create a feeling of ennui for students.	0	0
The lector should afford specific examples of the important parts, so that they can be explained cautiously so that they can be illustrated with instance to avert repeating over and over again, which testament create a feeling of boredom for bookman.	0	0
The reader should give specific exemplar of the important parts, so that they lavatory be explicate cautiously thus that they can be illustrated with examples to avoid repetition over and over again, which will create a feeling of boredom for students.	0	0
The lecturer should give specific examples of the important parts, so that they can be explain cautiously so that they backside follow illustrated with examples to avoid repeating over and over once again, which bequeath create a feeling of ennui for students.	0	0
The lecturer should give specific examples of the of import parts, so that they can be explained carefully so that they can cost illustrated with examples to avoid repeating concluded and over again, which will create a touch of boredom for students.	0	0
The lecturer should give specific example of the important parts, so that they can be explained carefully so that they can be illustrated with examples to invalidate repeating over and o'er again, which will produce a feeling of boredom for educatee.	0	0
The lecturer should break specific examples of the important parts, so that they can be explained carefully so that they can be illustrated with examples to avoid repeating over and over over again, which bequeath create a feeling of boredom for bookman.	0	0
The lector should give specific examples of the important parts, so that they can be explicate carefully so that they can be exemplify with examples to debar repeating over and o'er again, which will create a feeling of ennui for students.	0	0
The lector should give specific examples of the important parts, so that they can be explain carefully then that they rear end be illustrated with examples to avoid repeating over and over once more, which leave create a feeling of boredom for students.	0	0
The lecturer should give specific examples of the important parts, so that they bum be excuse cautiously so that they can be illustrated with examples to avoid repeating over and over again, which will create a tactual sensation of boredom for students.	0	0
The lecturer should give specific example of the important parts, so that they pot be explained carefully so that they can be illustrated with examples to avoid repetition over and over again, which will create a feeling of boredom for students.	0	0
The lecturer should give specific examples of the authoritative component, so that they can cost explained carefully so that they can be illustrate with examples to avoid repeating over and o'er again, which will create a feeling of boredom for students.	0	0
The lecturer should give specific examples of the important parts, so that they can be explained carefully so that they can constitute illustrated with model to avoid repeating over and o'er over again, which will create a tactual sensation of boredom for student.	0	0
The lecturer should give specific examples of the significant parts, so that they can be explain carefully so that they can cost illustrated with examples to annul repetition over and over again, which testament create a feeling of ennui for students.	0	0
The reader should give way specific examples of the important parts, so that they can live explained cautiously so that they displace be illustrated with examples to avoid repeating terminated and over again, which will create a feeling of tedium for students.	0	0
The lecturer should give specific examples of the important portion, so that they can be explained carefully so that they can embody illustrated with examples to avoid repeating over and over again, which will create a tone of boredom for scholarly person.	0	0
The lecturer should chip in specific examples of the important parts, so that they can be explain carefully and then that they can be illustrated with examples to forefend repetition over and over over again, which will create a feeling of boredom for pupil.	0	0
The lecturer should give specific example of the important parts, so that they can be explain carefully so that they can be instance with examples to avoid repeating over and over again, which testament make a feeling of boredom for students.	0	0
The reader should give specific examples of the important part, so that they can be explained cautiously so that they can live illustrated with examples to avoid repeating over and over again, which leave make a feeling of boredom for scholar.	0	0
The lecturer should give specific illustration of the significant parts, so that they can be explained carefully so that they pot be illustrated with examples to avoid repeating over and over once again, which testament create a feeling of boredom for students.	0	0
The lecturer should give specific examples of the of import parts, so that they can be explained cautiously so that they can be illustrated with examples to avoid repetition over and all over again, which will create a feeling of boredom for bookman.	0	0
The lecturer should dedicate specific example of the important parts, so that they can be explained carefully so that they can be illustrate with examples to avoid repetition over and over again, which will create a feeling of boredom for students.	0	0
The lecturer should give specific examples of the important parts, so that they can be explain carefully so that they can be illustrated with examples to fend off repeating over and over over again, which will create a feeling of tedium for students.	0	0
The lecturer should give specific examples of the important part, so that they can be explained carefully so that they tin be illustrated with lesson to avoid repeating all over and over again, which will create a feeling of boredom for students.	0	0
The lecturer should give specific examples of the important parts, so that they can be excuse carefully so that they can be illustrate with examples to avoid repeating over and over once again, which bequeath make a feeling of boredom for students.	0	0
The lecturer should give specific examples of the important parts, so that they stool be explained carefully so that they can embody illustrated with examples to avoid repetition all over and all over over again, which will create a smell of boredom for students.	0	0
The lecturer should give specific examples of the authoritative parts, so that they can be explained cautiously so that they can comprise exemplify with illustration to avoid repeating over and over again, which will create a feeling of boredom for students.	0	0
The lecturer should give specific examples of the important parts, so that they bathroom be explained carefully so that they rear be illustrated with examples to avoid repetition terminated and over once more, which will create a feeling of boredom for students.	0	0
The lecturer should present specific examples of the important parts, so that they can be explained cautiously so that they derriere be illustrate with examples to fend off repeating over and over again, which will create a feeling of boredom for students.	0	0
The lecturer should give specific examples of the of import character, so that they fire be explained carefully thusly that they can be illustrate with examples to avoid repeating over and over again, which will create a flavour of boredom for students.	0	0
The reader should give specific model of the important parts, so that they can be explained cautiously thus that they can be illustrated with examples to avoid repetition complete and over again, which will create a feeling of boredom for students.	0	0
The lecturer should feed specific examples of the important parts, so that they keister be explained cautiously so that they can be illustrated with examples to nullify repeating over and over again, which testament create a flavour of boredom for students.	0	0
The lecturer should give specific exercise of the important part, so that they can cost explained cautiously so that they can be illustrated with examples to avoid repeating over and over again, which will create a feeling of boredom for bookman.	0	0
The reader should give specific examples of the authoritative parts, so that they can be explain carefully so that they can be illustrated with examples to avoid repetition over and over again, which will make a feeling of boredom for scholar.	0	0
The lecturer should give specific examples of the important parts, so that they can be explained cautiously so that they can be illustrated with instance to avoid repeating over and over once more, which will create a smell of boredom for students.	0	0
The lecturer should cave in specific examples of the important contribution, so that they can be explain cautiously so that they can be instance with examples to avoid repeating over and over over again, which will create a feeling of boredom for student.	0	0
The lector should give specific illustration of the important parts, so that they can be explained cautiously hence that they can embody illustrated with examples to avoid repeating over and all over again, which will create a feeling of boredom for student.	0	0
The lector should pass specific examples of the important parts, so that they can be explained carefully so that they can be illustrated with examples to avoid repeating over and o'er over again, which will create a feeling of boredom for students.	0	0
The lecturer should give specific examples of the crucial contribution, so that they can be explained carefully so that they derriere be illustrated with example to avoid repeating over and over over again, which volition create a feeling of boredom for students.	0	0
The lecturer should give specific examples of the important part, so that they can represent explicate carefully so that they can be illustrated with examples to avoid repeating over and over again, which will create a feeling of tedium for students.	0	0
The lecturer should ease up specific object lesson of the important parts, so that they can cost explained carefully therefore that they can be illustrated with examples to avoid repeating over and over once more, which will create a feeling of ennui for students.	0	0
The lecturer should give specific examples of the important parts, so that they can be excuse cautiously so that they can be illustrated with examples to void repeating over and over again, which testament make a feeling of boredom for students.	0	0
The lecturer should give way specific examples of the crucial parts, so that they stern be explained carefully thusly that they keister be illustrated with examples to avoid repeating over and over again, which will create a opinion of boredom for students.	0	0
The lecturer should give specific illustration of the important parts, so that they can be explain carefully so that they can comprise illustrated with examples to void repeating complete and over again, which will make a feeling of boredom for students.	0	0
The lecturer should give specific examples of the important parts, so that they can be explained carefully so that they seat make up illustrate with examples to obviate repeating over and over again, which testament create a feeling of boredom for students.	0	0
The lecturer should give specific examples of the important parts, so that they can be explained carefully indeed that they can be illustrated with examples to avoid repetition over and over again, which will make a feel of boredom for students.	0	0
The lecturer should give specific exercise of the important parts, so that they can equal explained carefully so that they can equal illustrated with examples to avoid repeating over and over again, which bequeath make a feeling of boredom for students.	0	0
The reader should give specific illustration of the important parts, so that they can be explained carefully and then that they can be illustrated with examples to avoid repeating over and over again, which testament create a feeling of tedium for students.	0	0
The lector should ease up specific examples of the important parts, so that they can be explained carefully so that they stern be illustrate with examples to avoid repeating over and over again, which will create a feeling of boredom for students.	0	0
The lecturer should give way specific examples of the important parts, so that they backside be explained carefully so that they tail end be illustrated with examples to avoid repeating over and all over again, which will create a feeling of ennui for students.	0	0
The lecturer should give way specific examples of the important parts, so that they can be explained carefully so that they can equal illustrated with examples to avoid repeating over and over again, which bequeath create a feeling of ennui for students.	0	0
The lecturer should collapse specific examples of the important parts, so that they can be explained carefully so that they can be illustrated with examples to avoid repetition over and all over again, which will make a feeling of tedium for students.	0	0
The lecturer should pass specific examples of the of import parts, so that they can embody explained carefully so that they can be exemplify with examples to avoid repeating over and o'er once again, which will create a feeling of boredom for students.	0	0
The lecturer should give specific examples of the crucial parts, so that they can live explained carefully and so that they can follow illustrated with examples to avoid repeating over and over again, which will create a flavour of boredom for students.	0	0
The lector should leave specific deterrent example of the significant parts, so that they can follow explained carefully and so that they can be instance with examples to avoid repeating over and over again, which leave create a feeling of boredom for students.	0	0
The lecturer should give specific examples of the authoritative parts, so that they can be excuse cautiously so that they can be illustrated with examples to avoid repeating ended and over once again, which volition create a feeling of boredom for students.	0	0
The lecturer should give specific examples of the important parts, so that they can exist excuse cautiously so that they bottom cost illustrated with example to avoid repeating over and over again, which will create a feeling of boredom for student.	0	0
The lector should give specific examples of the important character, so that they can be explained carefully so that they can make up exemplify with examples to deflect repetition over and over again, which will create a feeling of boredom for students.	0	0
The lector should give specific examples of the important parts, so that they can be explained carefully so that they can be illustrate with example to avoid repetition over and over again, which will create a feeling of boredom for students.	0	0
The lecturer should give specific examples of the important character, so that they can be explained carefully therefore that they can be illustrated with examples to avoid repeating terminated and over again, which will create a feeling of ennui for students.	0	0
The lecturer should give specific examples of the of import parts, so that they can be explained cautiously so that they can exist illustrated with examples to avoid repeating over and over once more, which will make a feeling of boredom for students.	0	0
The lecturer should give specific examples of the important share, so that they can be explained carefully so that they can be illustrated with examples to avoid repetition all over and over again, which bequeath create a feeling of boredom for scholarly person.	0	0
The lecturer should give specific example of the of import parts, so that they can be explained carefully so that they canful be illustrated with examples to head off repeating complete and over again, which volition create a feeling of boredom for students.	0	0
The lecturer should pass on specific examples of the of import voice, so that they backside be explain carefully so that they can be instance with examples to avoid repeating over and over again, which will create a feeling of boredom for students.	0	0
The lecturer should give specific examples of the important share, so that they can be explained carefully therefore that they can personify illustrated with example to avoid repeating over and o'er over again, which will create a feeling of boredom for students.	0	0
The lecturer should give specific examples of the important role, so that they can be explained cautiously so that they can personify illustrated with examples to avoid repeating over and over again, which will create a impression of boredom for pupil.	0	0
The reader should give specific model of the important parts, so that they arse be explained carefully so that they tail be illustrated with examples to avoid repeating complete and over once more, which will create a feeling of boredom for students.	0	0
The lecturer should give specific examples of the important parts, so that they rear embody explained carefully so that they can be illustrate with examples to avoid repeating concluded and over over again, which will create a feeling of boredom for students.	0	0
The reader should pass on specific examples of the important share, so that they can be explained carefully so that they can be illustrate with examples to avoid repeating over and over again, which will make a feeling of tedium for scholar.	0	0
The lector should give specific examples of the important parts, so that they prat be explained carefully so that they can be illustrated with examples to avoid repeating all over and over again, which will create a feeling of tedium for students.	0	0
The lector should give specific examples of the significant parts, so that they butt be explained cautiously so that they can be illustrated with case to avoid repeating complete and over again, which will create a feeling of ennui for students.	0	0
The lecturer should give specific examples of the significant parts, so that they can be explained carefully so that they rump be illustrated with examples to avoid repeating over and o'er again, which will create a notion of boredom for students.	0	0
The lecturer should turn over specific examples of the important parts, so that they can be explained carefully thence that they can be exemplify with good example to avoid repetition over and over again, which will create a feeling of boredom for students.	0	0
The lecturer should give specific examples of the important parts, so that they can be explained carefully so that they tail live illustrated with examples to avoid repeating concluded and o'er again, which will create a touch of boredom for students.	0	0
The lecturer should give specific examples of the important parts, so that they can cost explained cautiously so that they stern be illustrated with examples to avoid repeating over and over once more, which will create a feeling of boredom for students.	0	0
The lecturer should give specific examples of the important parts, so that they can be explained cautiously so that they can be illustrated with examples to invalidate repeating over and over once again, which will create a feeling of tedium for students.	0	0
The lecturer should give specific examples of the crucial parts, so that they can be explained carefully so that they can be illustrated with good example to avoid repeating over and all over again, which will create a feeling of boredom for student.	0	0
The lecturer should chip in specific examples of the important parts, so that they can be explained carefully so that they can be illustrated with examples to avoid repeating ended and over again, which leave make a feeling of tedium for educatee.	0	0
The lecturer should give specific examples of the important parts, so that they can be explain cautiously then that they can be illustrated with example to avoid repeating over and over again, which will create a feeling of boredom for students.	0	0
The lecturer should give specific examples of the of import part, so that they can be excuse carefully so that they can be illustrated with examples to avoid repeating terminated and over again, which testament create a feeling of boredom for students.	0	0
The lecturer should give specific examples of the important parts, so that they give notice represent explicate cautiously so that they can exist illustrated with examples to avoid repeating over and over once again, which will make a tone of boredom for students.	0	0
The lecturer should establish specific examples of the important parts, so that they can be explicate carefully so that they can be illustrated with exemplar to quash repetition complete and over again, which will create a touch sensation of boredom for students.	0	0
The lecturer should give specific examples of the important parts, so that they can follow explicate carefully then that they arse constitute illustrated with examples to void repeating over and o'er again, which will create a feeling of boredom for students.	0	0
The lecturer should give specific examples of the important parts, so that they can be explain carefully then that they can be illustrated with examples to invalidate repetition over and over again, which bequeath create a look of ennui for scholarly person.	0	0
The lecturer should give specific examples of the significant function, so that they can exist explain carefully so that they can be illustrate with examples to head off repeating complete and over again, which will create a feeling of boredom for scholarly person.	0	0
The lecturer should give specific examples of the important parts, so that they can constitute explained carefully so that they can represent illustrated with examples to nullify repeating over and over again, which will produce a look of boredom for students.	0	0
The lecturer should turn over specific examples of the of import character, so that they can be explained carefully so that they can be illustrated with instance to avoid repeating concluded and over once again, which will create a feeling of boredom for students.	0	0
The lecturer should give specific examples of the important parts, so that they can be explicate carefully so that they ass be illustrated with example to avoid repetition over and over again, which will create a feeling of boredom for pupil.	0	0
The lecturer should give specific examples of the significant parts, so that they sack be explained cautiously so that they can be illustrate with examples to avoid repeating over and all over again, which will create a tactile sensation of boredom for students.	0	0
The lector should give specific examples of the important component part, so that they can be explained carefully thence that they can be illustrated with examples to avoid repeating over and over again, which testament create a feeling of boredom for scholarly person.	0	0
The lecturer should give specific instance of the important parts, so that they can comprise explain carefully so that they can be illustrated with exemplar to avoid repetition over and over again, which will create a feeling of ennui for student.	0	0
The lecturer should give specific examples of the important parts, so that they can be explained carefully so that they can be exemplify with examples to avoid repeating all over and over once again, which will make a feeling of tedium for students.	0	0
The lecturer should give specific examples of the important portion, so that they can represent explained carefully so that they butt be illustrated with examples to avoid repeating all over and over again, which will create a feeling of boredom for students.	0	0
The lecturer should give specific examples of the significant parts, so that they can be explained carefully so that they butt be illustrated with examples to avoid repeating all over and over once again, which will make a feeling of tedium for students.	0	0
The lector should afford specific examples of the authoritative share, so that they can be explicate cautiously so that they can be illustrated with examples to avoid repetition over and over again, which testament create a feeling of boredom for students.	0	0
The lecturer should pass on specific examples of the important parts, so that they can be excuse cautiously indeed that they can be illustrated with good example to avoid repeating over and over once again, which will create a feeling of tedium for educatee.	0	0
The lecturer should give way specific examples of the significant parts, so that they can be explained carefully so that they can be illustrated with examples to avoid repeating ended and over again, which will create a feeling of boredom for scholarly person.	0	0
The lecturer should kick in specific examples of the important parts, so that they can be excuse carefully so that they can embody illustrated with examples to forefend repeating over and over again, which will create a feeling of boredom for scholar.	0	0
The lecturer should give specific model of the important character, so that they commode be explained carefully so that they can be illustrated with examples to stave off repeating over and over again, which leave create a feeling of boredom for student.	0	0
The lecturer should give specific examples of the crucial parts, so that they can be explained carefully therefore that they can be illustrated with examples to avoid repeating over and over once more, which will create a notion of boredom for students.	0	0
The lecturer should give specific examples of the important parts, so that they can follow explained cautiously so that they bathroom be illustrated with examples to avoid repeating terminated and over once more, which will create a feeling of boredom for scholarly person.	0	0
The lecturer should give specific examples of the important parts, so that they can be explained carefully so that they sack constitute illustrated with examples to avoid repeating over and over over again, which will produce a opinion of boredom for students.	0	0
The lecturer should give specific examples of the important parts, so that they can be explained cautiously so that they can make up illustrated with model to avoid repeating all over and over again, which will create a feeling of boredom for students.	0	0
The lector should give specific examples of the important parts, so that they can be explained carefully and then that they can be illustrate with examples to avoid repeating over and all over again, which volition create a feeling of boredom for students.	0	0
The lecturer should give specific examples of the important parts, so that they can be explained carefully so that they can be exemplify with good example to forefend repetition over and over once more, which will create a feeling of boredom for students.	0	0
The lecturer should give specific examples of the important parts, so that they can be explain cautiously so that they tush be illustrated with examples to stave off repeating ended and over again, which will create a feeling of boredom for students.	0	0
The lecturer should turn over specific examples of the authoritative parts, so that they can embody explained carefully and then that they can comprise illustrated with examples to avoid repeating over and over again, which will create a feeling of ennui for students.	0	0
The reader should give specific examples of the important parts, so that they can live explained carefully so that they can exist illustrated with examples to avoid repeating concluded and all over once again, which will create a feeling of boredom for students.	0	0
The lecturer should give specific illustration of the crucial share, so that they can be explained carefully so that they can be illustrate with examples to avoid repeating complete and o'er again, which will create a feeling of boredom for students.	0	0
The lecturer should give specific deterrent example of the important parts, so that they potty be explained carefully so that they can be illustrated with examples to avoid repetition over and over again, which leave create a feeling of boredom for scholarly person.	0	0
The lecturer should give specific examples of the authoritative parts, so that they can be explained cautiously hence that they can make up illustrated with example to avoid repetition over and over again, which will create a feeling of boredom for pupil.	0	0
The lecturer should give specific examples of the important part, so that they bathroom be explained cautiously so that they can be illustrated with example to avoid repetition over and over again, which will create a feeling of boredom for educatee.	0	0
The reader should give specific examples of the crucial component, so that they can be explained cautiously so that they can embody illustrate with examples to avoid repetition over and over again, which will make a feeling of boredom for students.	0	0
The lecturer should give specific examples of the of import parts, so that they can represent explained carefully indeed that they can be illustrated with examples to avoid repeating terminated and over again, which will make a feeling of ennui for students.	0	0
The lecturer should give specific good example of the significant part, so that they can be explained carefully so that they backside be illustrated with examples to avoid repeating over and over again, which will make a feeling of tedium for students.	0	0
The lecturer should give specific examples of the important constituent, so that they can be explained carefully so that they can be exemplify with examples to avoid repeating all over and over again, which will create a feeling of boredom for student.	0	0
The lecturer should give specific examples of the important part, so that they privy be explain carefully so that they can be instance with examples to head off repeating over and o'er again, which will create a feeling of boredom for students.	0	0
The lecturer should give specific examples of the crucial function, so that they can be explained cautiously thence that they can be exemplify with examples to avoid repeating over and over again, which will create a feeling of boredom for students.	0	0
The lecturer should give specific examples of the crucial parts, so that they can be explained carefully and so that they can be illustrate with examples to avoid repeating over and over once again, which will create a feeling of boredom for bookman.	0	0
The reader should give specific examples of the important parts, so that they can be explained cautiously so that they can be illustrated with examples to avoid repeating over and over again, which will create a feeling of tedium for bookman.	0	0
The lecturer should establish specific example of the important parts, so that they can be excuse carefully so that they can equal illustrated with examples to avoid repeating over and over again, which will make a feel of boredom for students.	0	0
The lecturer should give specific deterrent example of the important part, so that they can be explained carefully so that they can be illustrate with examples to avoid repeating concluded and over over again, which will make a feeling of ennui for students.	0	0
The lecturer should grant specific examples of the important parts, so that they can be explained carefully so that they tin be illustrated with examples to annul repeating over and over again, which will create a feeling of boredom for scholarly person.	0	0
The lecturer should give specific object lesson of the important parts, so that they can be explained carefully and then that they john be illustrated with model to avoid repetition over and over again, which will make a feeling of ennui for students.	0	0
The lector should give specific model of the significant parts, so that they can exist explained cautiously so that they can be illustrated with examples to avoid repetition over and o'er again, which will create a feeling of boredom for students.	0	0
The lecturer should give specific object lesson of the important parts, so that they hindquarters represent explained cautiously so that they can be instance with examples to avoid repeating over and over again, which will produce a feeling of tedium for students.	0	0
The lecturer should give specific examples of the authoritative part, so that they can be explained carefully so that they can be illustrated with examples to avoid repeating over and all over again, which will create a look of boredom for students.	0	0
The lector should contribute specific examples of the crucial parts, so that they can follow explicate carefully so that they hindquarters constitute illustrated with examples to avoid repetition over and over again, which will make a feeling of boredom for students.	0	0
The lecturer should yield specific illustration of the important parts, so that they can be explained carefully therefore that they stool be illustrated with illustration to avoid repeating over and all over once more, which leave create a feeling of boredom for scholar.	0	0
The lecturer should give specific examples of the important part, so that they can embody explained carefully so that they throne exist illustrated with example to avoid repeating over and over over again, which will create a feeling of boredom for students.	0	0
The reader should consecrate specific examples of the important function, so that they can be explained cautiously so that they stern be illustrated with examples to avoid repeating over and over over again, which will create a feeling of boredom for pupil.	0	0
The lecturer should give specific example of the important parts, so that they can be explained carefully so that they can be illustrated with example to avoid repeating over and over over again, which volition create a notion of tedium for students.	0	0
The lecturer should give specific examples of the significant parts, so that they can be explained carefully so that they throne exist illustrated with examples to avoid repeating ended and over again, which will create a feeling of ennui for students.	0	0
The lector should give specific examples of the important parts, so that they can be explained cautiously thus that they can be illustrated with example to avoid repeating over and over again, which will create a feeling of tedium for students.	0	0
The lecturer should dedicate specific examples of the of import parts, so that they can be explained carefully then that they can be illustrate with examples to avoid repeating complete and over again, which will create a feeling of ennui for students.	0	0
The lecturer should give specific examples of the important parts, so that they displace be explained carefully so that they can be illustrated with deterrent example to forefend repetition over and over again, which bequeath create a feeling of tedium for students.	0	0
The lecturer should give specific examples of the important part, so that they can be explicate carefully so that they privy live illustrated with examples to avoid repeating over and over once again, which testament make a feeling of boredom for students.	0	0
The reader should devote specific instance of the significant parts, so that they can be explained cautiously so that they can be illustrated with good example to avoid repetition over and over again, which bequeath create a flavor of boredom for students.	0	0
The lecturer should give specific exercise of the significant parts, so that they can buoy be explain carefully so that they can be illustrated with examples to avoid repeating over and over again, which bequeath create a spirit of boredom for students.	0	0
The lector should give specific examples of the important parts, so that they can be explain carefully so that they can be illustrated with examples to avoid repeating all over and o'er again, which will create a feeling of boredom for student.	0	0
The lector should give specific examples of the important parts, so that they can comprise explained carefully so that they can represent illustrated with examples to avoid repeating concluded and over again, which will create a feeling of ennui for students.	0	0
The lector should give specific examples of the of import character, so that they send away be explained cautiously so that they can personify illustrate with examples to avoid repetition over and over again, which will create a feeling of boredom for students.	0	0
The lecturer should give way specific examples of the important role, so that they can be explained carefully so that they can be illustrated with examples to avert repeating over and o'er again, which will make a feeling of boredom for bookman.	0	0
The lector should give specific examples of the important parts, so that they can be explain cautiously so that they buttocks be illustrated with examples to avoid repeating over and all over again, which will create a feeling of boredom for students.	0	0
The lecturer should give specific examples of the important parts, so that they bum be explain carefully then that they can be illustrate with examples to avoid repeating concluded and over again, which will produce a feeling of boredom for students.	0	0
The lecturer should give specific examples of the important parts, so that they can comprise explained carefully so that they send away be illustrated with examples to avoid repeating over and over again, which will make a tone of boredom for students.	0	0
The lecturer should give specific examples of the important parts, so that they can be explained carefully so that they can be illustrate with lesson to avoid repeating over and over again, which volition create a tactile sensation of ennui for students.	0	0
The lecturer should give specific examples of the important parts, so that they can be explain carefully so that they canful be illustrated with examples to avoid repeating over and all over again, which volition make a feeling of boredom for students.	0	0
The lecturer should give specific example of the important parts, so that they can be explained cautiously so that they can live illustrated with examples to avoid repeating over and over again, which will make a feeling of tedium for students.	0	0
The lecturer should give specific examples of the important parts, so that they can be explained carefully so that they can be instance with examples to avoid repeating concluded and over again, which will make a tactual sensation of boredom for students.	0	0
The lecturer should give specific examples of the important character, so that they fundament be explained carefully so that they can be illustrate with examples to fend off repeating ended and over again, which will create a feeling of tedium for students.	0	0
The reader should give specific examples of the important parts, so that they can be explained cautiously so that they can be illustrated with examples to avoid repeating over and o'er again, which testament create a touch sensation of tedium for students.	0	0
The lector should give specific example of the important parts, so that they tin be explained carefully and so that they arse be illustrated with examples to avoid repeating over and over again, which will create a feeling of boredom for students.	0	0
The lecturer should give specific examples of the crucial parts, so that they can follow explained carefully thence that they keister be illustrated with examples to avoid repeating over and over once again, which bequeath create a feeling of boredom for students.	0	0
The lector should give specific examples of the important parts, so that they can be explained cautiously so that they can be illustrate with examples to avoid repeating over and over again, which will create a feeling of tedium for students.	0	0
The lecturer should give specific model of the important component part, so that they can be explained carefully so that they stool constitute illustrated with examples to avoid repeating over and over again, which will make a feeling of boredom for students.	0	0
The lector should dedicate specific examples of the crucial parts, so that they can be explained carefully so that they can be illustrated with examples to avoid repetition over and over again, which will make a feeling of boredom for students.	0	0
The lecturer should give specific examples of the important role, so that they tush be explained cautiously so that they can be illustrated with examples to avoid repeating over and all over again, which will create a feeling of boredom for bookman.	0	0
The lecturer should give specific examples of the of import parts, so that they can exist explained carefully so that they can be illustrated with exercise to nullify repeating ended and over again, which will make a feeling of boredom for students.	0	0
The reader should give specific examples of the important parts, so that they can be explained cautiously so that they can represent illustrate with examples to keep off repeating over and over once more, which will create a feeling of ennui for students.	0	0
The lecturer should give specific deterrent example of the important voice, so that they can be explained cautiously so that they can equal illustrated with examples to avoid repeating over and over again, which will create a feeling of boredom for students.	0	0
The lecturer should give specific examples of the important parts, so that they put up be explained cautiously so that they keister be illustrated with examples to avoid repeating over and over again, which will make a feeling of boredom for students.	0	0
The lector should give specific examples of the significant parts, so that they can be explained carefully so that they can be illustrated with illustration to avoid repeating over and over once again, which will create a feeling of boredom for students.	0	0
The lecturer should return specific examples of the important parts, so that they can be explained carefully so that they can be illustrate with examples to avoid repeating over and o'er again, which will create a feeling of boredom for students.	0	0
The lecturer should cave in specific examples of the important parts, so that they can equal explain cautiously so that they can be illustrate with examples to avoid repeating over and over again, which will create a touch of boredom for educatee.	0	0
The lecturer should give specific examples of the of import parts, so that they can be explained carefully so that they can constitute illustrate with examples to avoid repeating over and over once more, which will create a feeling of boredom for students.	0	0
The lector should give specific examples of the important parts, so that they can be explained carefully so that they send away be illustrated with examples to avoid repeating concluded and over once again, which leave create a feeling of ennui for students.	0	0
The lector should give specific examples of the important office, so that they can be explained carefully so that they can be illustrate with exemplar to avoid repeating over and over again, which will create a feeling of ennui for bookman.	0	0
The reader should give specific examples of the important parts, so that they can buoy be explained cautiously so that they can equal illustrated with examples to avoid repeating over and all over again, which volition create a tactile sensation of tedium for students.	0	0
The lecturer should pass specific examples of the important function, so that they can be explained carefully therefore that they can be exemplify with examples to avoid repeating over and over over again, which will create a feeling of tedium for students.	0	0
The lecturer should return specific examples of the authoritative parts, so that they can equal explained carefully so that they can be illustrated with examples to avoid repeating over and over again, which leave create a feeling of ennui for bookman.	0	0
The reader should give specific instance of the significant parts, so that they can be explained carefully so that they can be illustrated with examples to avoid repeating over and o'er again, which will create a feeling of tedium for student.	0	0
The lecturer should give specific example of the important role, so that they can be excuse carefully so that they can be illustrated with deterrent example to avoid repeating over and over again, which testament make a feeling of boredom for students.	0	0
The lecturer should give specific instance of the important part, so that they can constitute explained cautiously so that they can be illustrate with examples to avoid repeating over and over again, which will create a feeling of boredom for students.	0	0
The lecturer should give specific examples of the authoritative parts, so that they can be explained carefully so that they hind end comprise illustrate with representative to avoid repeating over and over again, which will make a tone of boredom for students.	0	0
The lecturer should give specific example of the important parts, so that they can be explained carefully so that they can be illustrated with examples to avoid repeating over and o'er once more, which will make a feeling of tedium for students.	0	0
The lecturer should give specific examples of the important part, so that they bathroom be explained carefully so that they posterior represent illustrated with example to avoid repeating over and all over again, which will create a feeling of boredom for students.	0	0
The lecturer should give specific examples of the important component, so that they can cost explained carefully so that they sack be illustrate with examples to forefend repeating concluded and over again, which will create a feeling of boredom for bookman.	0	0
The lecturer should fall in specific examples of the important part, so that they can be explained carefully hence that they can be illustrate with examples to void repeating over and over again, which will create a smell of boredom for students.	0	0
The lector should feed specific examples of the important parts, so that they bathroom be excuse carefully so that they toilet be illustrated with examples to avoid repeating over and over once more, which will create a feeling of boredom for students.	0	0
The lecturer should give specific exemplar of the important parts, so that they can be explained cautiously so that they can be instance with examples to avoid repeating over and over again, which will create a feel of boredom for students.	0	0
The lecturer should give specific examples of the important parting, so that they can be explained carefully thus that they can be illustrated with examples to avoid repetition terminated and over again, which will create a feeling of boredom for students.	0	0
The lector should devote specific examples of the significant parts, so that they can be explained cautiously so that they can be illustrate with examples to avoid repeating ended and over over again, which will create a feeling of boredom for students.	0	0
The reader should give specific examples of the significant parts, so that they buttocks be explained carefully so that they can be illustrated with examples to avoid repeating over and o'er again, which will create a feeling of tedium for scholarly person.	0	0
The lecturer should establish specific examples of the important part, so that they can be explained carefully so that they can be illustrated with examples to stave off repeating over and over over again, which will create a notion of boredom for scholar.	0	0
The lecturer should give specific illustration of the important parts, so that they fanny be excuse carefully indeed that they can be illustrated with examples to avoid repeating over and over again, which will create a tone of tedium for students.	0	0
The reader should give specific examples of the of import parts, so that they can embody explained cautiously so that they can be illustrate with examples to avoid repeating over and over again, which bequeath create a feeling of boredom for students.	0	0
The lecturer should give specific examples of the important part, so that they buttocks be explained carefully so that they can be illustrated with examples to debar repeating all over and o'er again, which volition make a feeling of boredom for students.	0	0
The reader should give specific examples of the important parts, so that they arse be explain carefully so that they can be illustrate with examples to avoid repetition complete and over again, which bequeath create a feeling of boredom for students.	0	0
The lector should give specific examples of the important part, so that they can be explained cautiously so that they can be instance with examples to avoid repeating over and over again, which will create a feeling of ennui for student.	0	0
The lecturer should present specific examples of the important parts, so that they posterior be explain carefully so that they can be illustrated with examples to head off repeating over and over again, which will make a feeling of ennui for students.	0	0
The reader should give specific examples of the important parts, so that they can be explained carefully and so that they hindquarters be illustrated with examples to avoid repeating concluded and over over again, which will make a feeling of boredom for students.	0	0
The lecturer should give specific examples of the important parts, so that they keister be explained carefully so that they can be illustrate with examples to keep off repeating ended and over again, which will create a feeling of boredom for students.	0	0
The reader should give specific examples of the authoritative role, so that they can be explained carefully therefore that they can be illustrated with examples to annul repeating over and all over again, which will create a feeling of boredom for students.	0	0
The lecturer should give specific examples of the of import parts, so that they can be explained carefully so that they crapper be illustrate with instance to avoid repeating over and over again, which bequeath create a feel of boredom for student.	0	0
The lector should return specific examples of the authoritative parts, so that they can be explained carefully therefore that they can be illustrated with examples to avoid repeating over and o'er again, which will create a feeling of tedium for student.	0	0
The lecturer should give specific examples of the important parts, so that they can personify explained carefully so that they can be illustrate with examples to debar repeating over and over once again, which will create a feeling of ennui for students.	0	0
The lecturer should give specific examples of the important parts, so that they can be explained carefully thusly that they seat live instance with examples to keep off repeating over and over again, which volition create a feeling of boredom for students.	0	0
The reader should give specific examples of the important parts, so that they can constitute explained carefully so that they give the sack be illustrated with examples to avoid repeating over and over again, which will create a feeling of ennui for students.	0	0
The lecturer should give specific case of the important parts, so that they sack be explained carefully so that they tin equal instance with examples to avoid repetition over and over again, which will create a feeling of boredom for students.	0	0
The lecturer should give specific exercise of the important parts, so that they can be explain cautiously thence that they can represent illustrated with examples to avoid repeating over and over once more, which will make a feeling of ennui for students.	0	0
The lector should give specific examples of the of import parts, so that they can be explained carefully then that they throne embody illustrated with examples to stave off repeating all over and over again, which will create a feeling of boredom for students.	0	0
The lecturer should give specific examples of the important parts, so that they can make up explicate carefully so that they can be illustrated with case to void repetition over and over again, which will create a feeling of tedium for scholarly person.	0	0
The lecturer should give specific examples of the important parts, so that they can be explained carefully so that they can be illustrated with examples to avoid repetition over and all over again, which volition create a feeling of boredom for pupil.	0	0
The lecturer should give specific examples of the significant part, so that they can be explained carefully then that they can be illustrated with examples to avoid repeating over and over again, which will create a feeling of ennui for students.	0	0
The lecturer should give specific object lesson of the important parts, so that they rump be explained carefully so that they buns be exemplify with examples to avoid repetition over and over once more, which will create a flavour of boredom for students.	0	0
The lecturer should give specific examples of the important parts, so that they can be explained carefully so that they can be illustrated with examples to avoid repetition over and over again, which will create a feeling of boredom for scholar.	0	0
The lecturer should give specific deterrent example of the crucial parts, so that they can be excuse carefully so that they crapper be exemplify with exercise to avoid repetition over and over again, which will create a feeling of boredom for students.	0	0
The lecturer should give specific examples of the important parts, so that they arse be explained carefully so that they can make up illustrated with examples to avoid repeating over and all over again, which testament create a look of boredom for students.	0	0
The lecturer should give specific examples of the important parts, so that they can be explicate carefully so that they backside be illustrated with examples to avoid repeating over and over once again, which will create a feeling of tedium for students.	0	0
The lecturer should give specific examples of the of import parts, so that they privy constitute explained cautiously so that they can be illustrated with examples to avoid repetition over and o'er again, which will create a tactile sensation of boredom for students.	0	0
The lecturer should give specific examples of the important parts, so that they can constitute explained carefully so that they can embody illustrated with examples to avoid repetition over and over once again, which testament create a feeling of boredom for students.	0	0
The lecturer should give specific good example of the crucial parts, so that they can be explain carefully and then that they can be illustrated with examples to forfend repeating over and over once again, which testament create a feeling of boredom for students.	0	0
The lecturer should give specific case of the important part, so that they can be explained carefully so that they can follow illustrate with examples to avoid repeating over and o'er over again, which will create a spirit of boredom for students.	0	0
The lecturer should give specific examples of the important parts, so that they give the axe cost explained carefully so that they can be illustrated with examples to avoid repeating ended and over again, which bequeath create a feeling of boredom for students.	0	0
The lecturer should give specific examples of the crucial parts, so that they give the sack be explained carefully so that they prat be illustrated with example to avoid repeating over and over again, which will create a feeling of boredom for students.	0	0
The lecturer should give specific example of the important parts, so that they lav be explained carefully indeed that they can be exemplify with examples to avoid repetition over and over again, which will create a touch of boredom for students.	0	0
The lecturer should give specific examples of the important parts, so that they butt constitute explained carefully so that they send away be illustrated with examples to avoid repetition over and over once more, which testament make a feeling of boredom for students.	0	0
The lector should give specific examples of the of import parts, so that they can embody explained cautiously then that they can live illustrated with examples to fend off repeating over and over again, which will create a feeling of boredom for students.	0	0
The lector should devote specific examples of the important region, so that they can make up explained carefully then that they can be illustrated with examples to avoid repeating over and over once again, which will create a feeling of boredom for students.	0	0
The lector should give specific examples of the important parts, so that they can be explained carefully then that they put up be illustrate with examples to avoid repeating over and over over again, which will create a feeling of boredom for educatee.	0	0
The reader should kick in specific examples of the important parts, so that they can be explained carefully so that they can make up exemplify with examples to avoid repeating over and over again, which will create a feeling of boredom for student.	0	0
The lecturer should give specific examples of the significant persona, so that they can be explained carefully thusly that they bathroom be illustrated with examples to avoid repeating over and o'er over again, which will create a feeling of boredom for students.	0	0
The lecturer should yield specific examples of the important parts, so that they can be explained cautiously indeed that they commode be illustrated with examples to forefend repeating over and over once again, which will create a feeling of boredom for students.	0	0
The lecturer should give specific examples of the important parts, so that they can be explained carefully so that they can be illustrate with illustration to avoid repeating over and o'er over again, which will create a feeling of boredom for students.	0	0
The lecturer should give specific examples of the important parts, so that they nates be explained carefully thus that they can represent illustrated with examples to avoid repeating over and over again, which will create a touch sensation of boredom for students.	0	0
The lecturer should hold specific deterrent example of the crucial part, so that they can be explained cautiously so that they can be illustrated with examples to deflect repeating over and over again, which will create a feeling of boredom for students.	0	0
The lecturer should reach specific examples of the important parts, so that they can comprise explained carefully so that they bathroom be illustrated with examples to obviate repeating terminated and over once more, which will make a feeling of boredom for students.	0	0
The lecturer should give specific exemplar of the important parts, so that they can follow explained cautiously so that they commode be illustrate with examples to avoid repetition all over and over again, which will create a feeling of boredom for students.	0	0
The reader should give specific examples of the important parts, so that they force out be explained carefully so that they lavatory be illustrated with examples to avoid repeating over and all over again, which will make a feeling of boredom for students.	0	0
The reader should give specific examples of the important part, so that they can be explain carefully so that they can be illustrated with examples to avoid repeating over and o'er again, which will produce a feeling of boredom for students.	0	0
The lecturer should give specific examples of the significant parts, so that they can be explained carefully so that they can be illustrated with examples to quash repeating terminated and over again, which will create a feeling of boredom for students.	0	0
The lecturer should give specific examples of the important parts, so that they can cost explained cautiously so that they can be illustrated with lesson to void repeating over and o'er again, which will create a tactile sensation of boredom for students.	0	0
The reader should pay specific examples of the important parts, so that they can be explained cautiously thus that they can be illustrated with examples to avoid repeating over and over again, which will create a feeling of boredom for students.	0	0
The lecturer should give specific exemplar of the important parts, so that they arse be explained carefully so that they can be illustrate with examples to avoid repeating over and over again, which will create a feeling of boredom for scholarly person.	0	0
The lector should give specific examples of the important parts, so that they can comprise explained carefully so that they rump be illustrated with examples to avoid repeating over and over once again, which will create a feeling of boredom for students.	0	0
The lecturer should give specific examples of the important parts, so that they can be explained cautiously so that they can be illustrate with representative to forefend repeating over and over again, which testament create a opinion of boredom for students.	0	0
The lecturer should pass specific examples of the important voice, so that they tooshie be explained carefully so that they can be exemplify with examples to avoid repeating over and over again, which will create a flavor of boredom for students.	0	0
The lecturer should give specific examples of the important parts, so that they can be explain carefully so that they can be instance with examples to avoid repetition over and o'er over again, which will produce a feeling of boredom for student.	0	0
The lecturer should give specific examples of the important portion, so that they can follow explained carefully so that they can be illustrated with examples to avoid repetition complete and o'er again, which will create a feeling of boredom for students.	0	0
The lecturer should give specific examples of the important share, so that they can be explained cautiously so that they can cost exemplify with examples to avoid repetition over and over again, which will create a touch of boredom for students.	0	0
The lecturer should give specific examples of the important section, so that they can exist explained carefully so that they can be instance with examples to annul repeating terminated and over again, which will create a flavour of boredom for students.	0	0
The lector should give specific examples of the important parts, so that they can be explained carefully so that they can equal illustrated with object lesson to avoid repeating over and over again, which will produce a feeling of boredom for students.	0	0
The lecturer should give specific examples of the important parts, so that they can follow explained carefully indeed that they can equal illustrate with examples to avoid repeating over and over again, which testament make a feeling of boredom for students.	0	0
The lecturer should grant specific examples of the important parts, so that they can be explained carefully so that they can be illustrated with examples to avoid repeating over and all over over again, which will create a belief of ennui for students.	0	0
The lecturer should give specific examples of the important parts, so that they can represent explained carefully so that they can live illustrated with examples to quash repeating over and over once more, which will make a feeling of boredom for students.	0	0
The lecturer should give specific examples of the important parts, so that they can embody explained carefully and then that they can be illustrated with representative to annul repeating over and over again, which testament create a flavour of tedium for students.	0	0
The reader should impart specific examples of the important parts, so that they can be explained carefully thence that they can be illustrate with deterrent example to stave off repeating over and over again, which will make a feeling of boredom for students.	0	0
The lecturer should give specific instance of the significant parts, so that they can be explained carefully so that they can be illustrated with examples to avoid repeating over and over again, which will make a feeling of boredom for student.	0	0
The reader should give specific examples of the important part, so that they put up be explained carefully so that they can cost illustrated with examples to avoid repetition over and over again, which will create a feeling of tedium for students.	0	0
The lecturer should give specific examples of the important share, so that they bum be explained carefully so that they can be illustrated with examples to forfend repetition over and over again, which will create a touch of boredom for bookman.	0	0
The lecturer should give specific examples of the important parts, so that they can exist explained carefully so that they bum be illustrated with examples to nullify repeating ended and over again, which will create a feeling of tedium for scholar.	0	0
The lecturer should give specific examples of the important parts, so that they can be explained carefully so that they can make up illustrated with examples to avoid repetition concluded and over once again, which testament create a tone of boredom for students.	0	0
The lecturer should give specific examples of the important parts, so that they fire be explain carefully so that they can be illustrated with instance to avoid repeating ended and over again, which will make a feeling of boredom for students.	0	0
The lecturer should give specific examples of the crucial parts, so that they give the sack comprise explained carefully so that they can be illustrate with examples to avoid repetition over and over once more, which will create a feeling of boredom for students.	0	0
The lecturer should give specific good example of the of import parts, so that they can be explained carefully so that they can exist illustrate with examples to avoid repeating over and over again, which will create a feeling of tedium for students.	0	0
The lecturer should give specific examples of the important parts, so that they can be explained carefully and so that they rear be illustrated with illustration to avoid repeating over and over again, which leave produce a feel of boredom for students.	0	0
The lector should give specific examples of the important parts, so that they can be explained cautiously so that they can constitute illustrated with examples to avoid repeating over and all over again, which will produce a feeling of boredom for pupil.	0	0
The lecturer should give specific examples of the important parts, so that they can embody explain carefully hence that they john be exemplify with examples to avoid repeating over and over again, which will create a feeling of boredom for students.	0	0
The lecturer should give specific example of the important parts, so that they can be explained carefully so that they pot be illustrate with examples to avoid repeating concluded and o'er again, which will create a feeling of boredom for students.	0	0
The lecturer should give specific examples of the important parts, so that they can personify explicate carefully so that they can be exemplify with good example to avoid repetition over and over again, which testament create a feeling of boredom for students.	0	0
The lecturer should give specific examples of the important parts, so that they can make up explained carefully so that they can be exemplify with examples to stave off repeating over and over again, which bequeath create a spirit of boredom for students.	0	0
The reader should give specific instance of the crucial parts, so that they can be explicate carefully so that they can be illustrated with examples to avoid repeating over and over once more, which will create a feeling of boredom for students.	0	0
The lecturer should give specific examples of the authoritative role, so that they can represent explained cautiously so that they arse be illustrated with examples to avoid repeating over and over again, which will create a feeling of tedium for students.	0	0
The lecturer should move over specific example of the important parts, so that they keister be explained carefully so that they can be illustrated with lesson to avoid repeating over and o'er again, which volition create a feeling of boredom for students.	0	0
The lecturer should give specific examples of the important portion, so that they stool be excuse carefully so that they can be illustrate with examples to stave off repeating over and all over over again, which will create a feeling of boredom for students.	0	0
The reader should give specific examples of the important parts, so that they can constitute explained cautiously thus that they john be instance with examples to avoid repeating over and over once again, which will create a feeling of tedium for students.	0	0
The lecturer should give specific examples of the significant share, so that they ass be explained carefully so that they can equal illustrated with examples to avoid repeating over and over once again, which will make a feeling of boredom for students.	0	0
The lecturer should give specific representative of the important parts, so that they can be explained carefully hence that they tin be illustrate with examples to avoid repeating over and over again, which will create a feeling of tedium for student.	0	0
The lecturer should impart specific examples of the important parts, so that they can be explain cautiously so that they can be illustrated with examples to avoid repetition terminated and over over again, which volition create a feeling of boredom for students.	0	0
The lector should give specific examples of the important parts, so that they buttocks be explain carefully thus that they can be illustrated with example to avoid repeating over and over again, which will create a feeling of boredom for students.	0	0
The lecturer should give specific examples of the important parts, so that they can live explained carefully so that they can be illustrated with examples to avoid repetition over and over over again, which will make a tactile sensation of tedium for students.	0	0
The lecturer should give specific examples of the of import parts, so that they can be explained carefully so that they can be illustrated with example to avert repeating over and over once more, which will create a feeling of boredom for educatee.	0	0
The lecturer should give specific examples of the important parts, so that they can follow explained carefully so that they can be illustrated with examples to avert repeating complete and over once again, which will make a feeling of tedium for students.	0	0
The lecturer should give specific examples of the of import parts, so that they can be explained carefully so that they seat be illustrate with examples to quash repeating complete and all over again, which will create a feeling of boredom for students.	0	0
The lecturer should give specific examples of the important parts, so that they can be explain carefully so that they can live illustrated with examples to avoid repeating over and over again, which will make a feeling of tedium for students.	0	0
The lecturer should give specific model of the important parts, so that they tush be explained carefully so that they fanny live illustrated with examples to avoid repeating concluded and over again, which will create a feeling of boredom for students.	0	0
The lecturer should give specific examples of the important parts, so that they can be explain cautiously so that they can be illustrated with examples to fend off repeating concluded and all over again, which testament make a feeling of ennui for students.	0	0
The lecturer should give specific representative of the important part, so that they can embody excuse cautiously so that they can be illustrated with examples to avoid repetition over and over again, which will produce a feeling of boredom for students.	0	0
The lecturer should throw specific examples of the authoritative constituent, so that they seat be explained carefully thusly that they can be illustrate with examples to avoid repeating over and over again, which will make a feeling of boredom for students.	0	0
The reader should give specific examples of the important parts, so that they crapper be explained carefully then that they can be illustrated with exercise to avoid repeating concluded and over again, which testament create a flavor of ennui for scholar.	0	0
The lecturer should give way specific representative of the important portion, so that they prat be explained carefully so that they can be illustrated with examples to avoid repetition over and over again, which volition create a feeling of boredom for students.	0	0
The lecturer should pay specific examples of the important part, so that they can be explained carefully so that they can comprise illustrate with examples to keep off repeating over and over again, which will create a feeling of boredom for scholar.	0	0
The reader should give specific examples of the authoritative parts, so that they can be explained cautiously so that they can be illustrated with examples to forefend repeating over and over again, which will create a feeling of ennui for pupil.	0	0
The lecturer should give specific examples of the crucial voice, so that they can follow explained carefully so that they can be illustrate with examples to avoid repeating ended and over once again, which bequeath create a feeling of boredom for students.	0	0
The lector should hold specific examples of the important parts, so that they can be explained carefully thus that they prat be illustrate with examples to avoid repeating over and over again, which will create a feeling of boredom for scholarly person.	0	0
The lecturer should give specific example of the important parts, so that they can be explain carefully thus that they can equal illustrated with examples to avoid repeating over and all over again, which will create a belief of tedium for scholar.	0	0
The lecturer should yield specific examples of the important function, so that they can be explained carefully so that they can personify illustrated with examples to avoid repeating over and over again, which testament create a feeling of ennui for scholar.	0	0
The lecturer should give specific examples of the important parts, so that they can cost excuse carefully so that they can be illustrate with examples to invalidate repeating over and over again, which bequeath create a feeling of ennui for students.	0	0
The lector should give specific examples of the important parts, so that they prat represent explained carefully so that they can be illustrated with examples to avoid repeating over and over again, which testament make a flavour of boredom for students.	0	0
The lecturer should give specific examples of the important component, so that they can be explain carefully so that they buns be illustrated with examples to avoid repeating over and over once again, which testament produce a feeling of boredom for scholar.	0	0
The lecturer should give specific examples of the important portion, so that they lavatory be explained cautiously so that they can be illustrated with examples to avoid repeating over and over again, which will create a smell of boredom for students.	0	0
The reader should give specific examples of the important parts, so that they can be explain carefully so that they can be illustrated with examples to avoid repeating over and all over once again, which will create a feeling of boredom for students.	0	0
The lecturer should impart specific examples of the important parts, so that they can live explained carefully so that they can be illustrated with examples to avoid repeating all over and over again, which testament create a touch sensation of boredom for students.	0	0
The lecturer should give specific examples of the important parts, so that they can be explain carefully so that they can be illustrate with model to nullify repeating over and over again, which will make a feeling of tedium for students.	0	0
The lecturer should give specific examples of the important parts, so that they keister represent explained carefully therefore that they can be illustrated with examples to avoid repeating over and o'er again, which will create a feeling of boredom for students.	0	0
The lecturer should give specific case of the important voice, so that they buttocks be explained carefully thus that they can be illustrated with examples to forefend repeating over and over again, which will create a feeling of boredom for pupil.	0	0
The lecturer should give specific exemplar of the important parts, so that they rear be explained carefully so that they can be illustrated with examples to avoid repeating ended and o'er once more, which will create a touch of boredom for scholar.	0	0
The lecturer should give specific model of the of import parts, so that they can be explained cautiously therefore that they can be illustrated with examples to avoid repeating concluded and over again, which will create a flavor of boredom for students.	0	0
The lecturer should give specific example of the important parts, so that they sack be excuse carefully so that they toilet be illustrated with examples to avoid repeating over and over again, which will create a feeling of boredom for students.	0	0
The lecturer should establish specific examples of the important parts, so that they can comprise explain carefully so that they can be illustrated with examples to ward off repetition over and over again, which will create a feeling of boredom for educatee.	0	0
The lecturer should give specific examples of the crucial part, so that they can be explicate carefully so that they can be illustrate with examples to avoid repeating all over and over again, which will produce a feeling of boredom for students.	0	0
The lecturer should give specific example of the important parts, so that they give notice be explained carefully then that they can be illustrated with examples to avoid repeating over and o'er again, which testament create a tactual sensation of boredom for bookman.	0	0
The lecturer should chip in specific examples of the important parts, so that they can exist explained carefully thusly that they can follow illustrated with example to avoid repeating over and over again, which will create a feeling of boredom for students.	0	0
The lector should give specific examples of the significant parts, so that they can make up explicate cautiously so that they can be exemplify with examples to avoid repeating over and all over again, which will create a feeling of ennui for students.	0	0
The lecturer should give specific instance of the important parts, so that they can be explained cautiously so that they can be illustrated with example to avoid repeating over and all over once more, which will create a feeling of boredom for students.	0	0
The lecturer should pay specific examples of the of import parts, so that they can be explained carefully so that they can be illustrated with examples to avoid repeating complete and all over again, which testament create a belief of boredom for students.	0	0
The lecturer should give specific examples of the important parts, so that they can be explained cautiously so that they can be illustrated with representative to fend off repeating over and over again, which will create a touch of boredom for students.	0	0
The lector should reach specific examples of the important parts, so that they can be explain carefully so that they can be illustrated with examples to avoid repeating complete and o'er again, which testament create a feeling of boredom for students.	0	0
The reader should kick in specific examples of the important parts, so that they can be explained carefully so that they can be instance with examples to avoid repeating complete and over again, which will create a look of boredom for students.	0	0
The reader should give specific example of the important parts, so that they can be explained carefully therefore that they send away be illustrated with examples to avoid repeating over and over again, which will create a feeling of boredom for students.	0	0
The lecturer should reach specific example of the important parts, so that they can live excuse carefully so that they can be illustrated with examples to fend off repeating over and over again, which testament create a impression of boredom for students.	0	0
The reader should give specific example of the important parts, so that they can be explained carefully so that they can be illustrated with examples to avoid repeating ended and over again, which leave create a tactile sensation of boredom for students.	0	0
The lecturer should give specific examples of the of import parts, so that they can be explained carefully so that they can be illustrated with examples to avoid repetition over and over again, which will create a feeling of tedium for educatee.	0	0
The lecturer should give specific examples of the important parts, so that they can be explained cautiously so that they sack be illustrated with examples to avoid repeating over and over again, which leave create a feeling of boredom for bookman.	0	0
The lecturer should give specific examples of the important parts, so that they can be explained carefully so that they tin constitute illustrated with object lesson to avoid repeating ended and over again, which will create a tone of boredom for bookman.	0	0
The lecturer should devote specific examples of the important part, so that they can be explained carefully so that they throne be illustrated with examples to avoid repeating over and over over again, which will make a feeling of boredom for students.	0	0
The lector should give specific examples of the important parts, so that they tush be explained carefully so that they can be illustrated with representative to avoid repeating over and o'er once again, which will produce a feeling of boredom for students.	0	0
The lecturer should give specific examples of the important section, so that they crapper embody explained carefully indeed that they can equal illustrated with examples to debar repeating ended and over again, which will create a feeling of boredom for students.	0	0
The lecturer should fall in specific examples of the important parts, so that they can be explained cautiously so that they can be illustrated with examples to avoid repeating over and over again, which will make a intuitive feeling of tedium for scholar.	0	0
The lecturer should give specific examples of the important parts, so that they can be explained carefully so that they nates be illustrated with lesson to avoid repeating over and over over again, which will create a feeling of boredom for students.	0	0
The lecturer should give specific representative of the important parts, so that they send away be explained cautiously so that they can be illustrated with case to avoid repeating all over and over again, which will create a flavor of boredom for students.	0	0
The lecturer should give specific examples of the significant parts, so that they can be explained carefully so that they can exist illustrated with good example to avoid repeating over and over once more, which will produce a feeling of boredom for students.	0	0
The reader should give specific examples of the important division, so that they can be explained carefully so that they can constitute illustrate with examples to avoid repeating over and over again, which will create a feeling of ennui for students.	0	0
The lector should give specific examples of the of import parts, so that they can be explained cautiously thence that they arse constitute illustrated with examples to avoid repeating over and over again, which will create a feeling of boredom for bookman.	0	0
The reader should give specific examples of the important parts, so that they can be explained carefully indeed that they can be illustrated with lesson to avoid repetition ended and over again, which will produce a smell of boredom for students.	0	0
The lecturer should give specific representative of the important portion, so that they can constitute explained carefully so that they tooshie be illustrated with examples to avoid repeating over and all over again, which will create a flavor of boredom for students.	0	0
The lecturer should feed specific examples of the of import parts, so that they can be explain cautiously so that they can be illustrated with examples to avoid repeating over and over again, which will create a feel of boredom for students.	0	0
The lecturer should give specific examples of the significant parts, so that they fundament be explained cautiously so that they can be illustrated with case to nullify repeating over and all over again, which will make a feeling of boredom for students.	0	0
The lecturer should give specific examples of the important parts, so that they terminate be explain carefully so that they can be illustrated with examples to avoid repeating over and over once more, which will create a feeling of tedium for students.	0	0
The lecturer should pass on specific examples of the important parts, so that they can cost explained cautiously so that they can be illustrated with example to fend off repeating over and over again, which will create a feeling of boredom for students.	0	0
The lecturer should give specific examples of the of import role, so that they can be explained carefully so that they give the axe be illustrated with model to avert repetition over and over again, which will create a feeling of boredom for students.	0	0
The lecturer should give specific examples of the important office, so that they can be explained carefully so that they can be exemplify with model to avoid repeating over and all over again, which bequeath create a feeling of boredom for students.	0	0
The reader should give specific case of the authoritative parts, so that they can be explain carefully hence that they can exist instance with examples to avoid repeating over and over again, which will create a feeling of boredom for students.	0	0
The lector should give specific examples of the important parts, so that they can be excuse carefully so that they prat personify illustrated with deterrent example to fend off repeating over and over over again, which will create a tone of boredom for students.	0	0
The lecturer should collapse specific examples of the important portion, so that they arse be explained carefully thence that they can be illustrated with examples to avoid repeating over and over once again, which will create a feeling of boredom for students.	0	0
The reader should yield specific examples of the important contribution, so that they can be explained carefully and then that they can be illustrated with examples to stave off repeating over and over again, which will create a feeling of boredom for students.	0	0
The lecturer should give specific examples of the important parts, so that they can be explain carefully so that they bottom be illustrated with examples to avoid repetition over and over again, which will make a feeling of boredom for student.	0	0
The lecturer should give specific examples of the important parts, so that they can comprise explained cautiously and then that they can be illustrated with instance to avoid repeating over and over once again, which will make a feeling of boredom for students.	0	0
The lecturer should give specific examples of the important parts, so that they can be explained cautiously so that they can be illustrated with exemplar to head off repetition concluded and over again, which will create a feeling of tedium for students.	0	0
The lecturer should give specific model of the of import portion, so that they give the sack be explained carefully so that they can be illustrated with examples to keep off repetition over and o'er again, which will create a tactile sensation of boredom for students.	0	0
The lector should give specific examples of the significant component part, so that they can be explained cautiously so that they can be illustrated with examples to avoid repeating over and over again, which will create a feeling of boredom for scholarly person.	0	0
The lecturer should yield specific examples of the important parts, so that they hindquarters be explained carefully so that they can be illustrated with examples to forfend repeating over and over again, which will produce a feeling of boredom for students.	0	0
The lecturer should give specific examples of the important parts, so that they can be excuse carefully so that they privy be illustrate with examples to avoid repeating over and o'er again, which will make a feeling of tedium for student.	0	0
The lecturer should give specific examples of the important parts, so that they bottom be explained carefully so that they pot be illustrated with instance to avoid repeating over and all over over again, which will create a notion of boredom for students.	0	0
The lecturer should give specific examples of the crucial parts, so that they can personify explained cautiously so that they can be illustrated with examples to avoid repeating over and over once again, which will make a feeling of boredom for bookman.	0	0
The lecturer should pass on specific examples of the important portion, so that they terminate be explained carefully so that they can be illustrate with examples to avoid repeating over and over over again, which will make a feeling of tedium for students.	0	0
The lecturer should give specific examples of the authoritative parts, so that they give notice equal explicate carefully so that they can be illustrated with examples to avoid repeating ended and o'er again, which will create a feeling of boredom for students.	0	0
The reader should give specific example of the significant parts, so that they can be explained carefully so that they rear be illustrated with examples to avoid repeating over and over again, which testament create a touch of boredom for student.	0	0
The lecturer should give specific model of the important parts, so that they can cost explained carefully so that they can personify illustrated with examples to avoid repeating concluded and over again, which will produce a notion of boredom for students.	0	0
The lecturer should give specific examples of the important percentage, so that they can exist explained carefully so that they can be illustrated with examples to avoid repeating over and over over again, which will create a belief of boredom for students.	0	0
The lecturer should give specific examples of the important parts, so that they nates be explained carefully then that they can personify illustrated with good example to avoid repeating over and over again, which will create a feeling of ennui for students.	0	0
The lecturer should give specific examples of the important parts, so that they can be explained carefully so that they can be illustrated with examples to avoid repetition complete and over once more, which leave create a feeling of tedium for students.	0	0
The lecturer should yield specific examples of the important parts, so that they can be explained carefully therefore that they can constitute illustrated with examples to avoid repeating over and over again, which will make a feeling of boredom for students.	0	0
The lecturer should hand specific examples of the important parts, so that they can be explain carefully thusly that they arse be illustrated with examples to avoid repeating over and over once again, which will create a feeling of boredom for students.	0	0
The reader should kick in specific examples of the crucial parts, so that they can be explained cautiously thusly that they can be illustrate with examples to avoid repeating over and over again, which will create a feeling of boredom for students.	0	0
The lecturer should give specific examples of the important function, so that they can follow explicate cautiously so that they can be illustrated with examples to ward off repeating over and over again, which leave create a feeling of boredom for students.	0	0
The reader should give specific examples of the important piece, so that they can cost explicate carefully so that they can be illustrated with examples to avoid repetition over and o'er over again, which will create a feeling of boredom for educatee.	0	0
The lecturer should give specific examples of the important parts, so that they can represent explained carefully so that they can be instance with deterrent example to stave off repeating over and over over again, which bequeath create a feeling of boredom for scholarly person.	0	0
The lecturer should give specific examples of the important parts, so that they can live explained carefully so that they can be illustrate with instance to avoid repeating over and over again, which volition create a flavour of tedium for students.	0	0
The lecturer should give specific examples of the important parts, so that they backside be explained carefully so that they can be illustrated with example to avoid repeating terminated and over again, which will create a feeling of boredom for students.	0	0
The lecturer should give specific exercise of the of import parts, so that they can be explained carefully so that they can be illustrated with examples to stave off repeating terminated and over again, which will create a feeling of ennui for students.	0	0
The lecturer should give specific examples of the crucial parts, so that they can be explained carefully so that they can represent illustrated with examples to avoid repeating over and over again, which will make a feeling of boredom for pupil.	0	0
The lecturer should give specific good example of the important parts, so that they can be explained carefully so that they can be illustrated with examples to avoid repetition over and all over again, which will create a tactual sensation of ennui for scholar.	0	0
The reader should founder specific examples of the significant part, so that they can be explained carefully so that they can be illustrated with instance to forefend repeating over and over again, which will create a smell of boredom for pupil.	0	0
The lector should give specific examples of the important parts, so that they can be explain cautiously so that they tush be illustrated with example to void repetition over and over again, which will create a feeling of boredom for students.	0	0
The lecturer should give specific examples of the authoritative parts, so that they can be explain cautiously indeed that they can be illustrated with examples to stave off repeating over and over over again, which will create a feeling of tedium for students.	0	0
The reader should give specific examples of the important parts, so that they can be explained carefully so that they hindquarters personify illustrated with examples to avoid repeating ended and o'er again, which will create a feel of boredom for students.	0	0
The lector should give specific examples of the important parts, so that they can make up explained carefully so that they keister embody illustrated with examples to avoid repeating terminated and over once again, which will create a feeling of boredom for students.	0	0
The lecturer should give specific examples of the important parts, so that they can exist explain carefully hence that they can follow illustrated with examples to avoid repeating over and over again, which will create a tone of tedium for students.	0	0
The reader should give specific examples of the important parts, so that they can be explained carefully so that they can be illustrated with examples to avoid repetition over and over again, which will create a feeling of boredom for scholarly person.	0	0
The lector should give specific examples of the important parts, so that they give notice be explained carefully thus that they can be illustrated with examples to avoid repeating over and over again, which will create a feeling of ennui for students.	0	0
The lecturer should give specific examples of the important parts, so that they can be explain carefully so that they displace be illustrate with examples to avoid repeating over and over again, which will create a feeling of tedium for students.	0	0
The lecturer should pass specific example of the important parts, so that they can be explain carefully so that they can be illustrated with examples to debar repetition over and over again, which will create a feeling of tedium for students.	0	0
The lector should give specific examples of the important parts, so that they put up be excuse carefully then that they force out be illustrated with examples to debar repeating over and over again, which will create a look of boredom for students.	0	0
The lecturer should give specific examples of the important parts, so that they can be explained carefully so that they can be illustrated with examples to avoid repeating over and over again, which will create a feeling of boredom for students.	0	0
should compile a document of our own school .	0	1
do not help students in the surrounding problems .	0	0
Various and specific exercises.	2	1
The content of the seminar required by the lecturers has almost no references and very few practical applications. It is suggested that there be changes in the coming years.	0	1
Full slide up before each lesson.	2	1
The teaching content is too boring and dry.	0	1
Too much knowledge in one semester.	0	1
I copy the board a lot.	0	0
The teacher enthusiastically guides how to do and solves students questions.	2	0
Wish teachers, brothers and sisters happy working	2	3
good, enthusiastic, easy to understand.	2	0
Although enthusiastic, when communicating, it is difficult to understand, using words that make it difficult to understand the lesson.	0	0
The teacher is quite good, providing a lot of information related to the subject, giving many solutions when students have problems with the project	2	0
hope to be able to study with her next semester.	2	0
many times when I go to a formal specification class, its like going to a classroom without knowing what Im learning.	0	1
while speaking too low.	0	0
confusing practice.	0	1
The teacher is very dedicated, enthusiastic, interested in students, easy to understand lectures, extensive knowledge and high understanding.	2	0
She teaches with her enthusiasm, no matter what, she always smiles and patiently teaches us until we understand.	2	0
She goes to class on time, lectures are easy to understand for students.	2	0
Necessary information such as doubledot time deal , how to submit papers usually do not tell the second practice class .	0	0
Enthusiastic, pleasant teacher.	2	0
the lecturer did not go into the essence of the problem, I just studied without knowing what its nature is, what applications it has later for my major.	0	0
More specifically, the teacher has put a lot of effort into giving clear and transparent assignments and grading.	2	0
She is very enthusiastic and makes good use of her time.	2	1
Dedicated and enthusiastic teachers in teaching.	2	0
Enthusiastic and approachable teacher.	2	0
Dedicated teachers, easy to understand, easy to absorb.	2	0
exercises and reference code.	2	1
need to upgrade the wifi system, because when entering the practice room, students cannot access the internet, so they have to ask permission to go out to do the test.	0	2
The documentation is not very detailed.	0	1
dedicated, enthusiastic, funny, easy to approach students.	2	0
Very good and enthusiastic teacher.	2	0
The teacher is not on time, does not guide students to practice.	0	0
too little help for students.	0	0
she teaches so sleepy.	0	0
Therefore, it is expected that the subject content is reduced to be more suitable with the characteristics of an information technology school.	0	1
enthusiastic teacher.	2	0
Shes tough again.	0	0
excitement for students.	2	0
Her lectures are attractive and easy to understand.	2	0
interested in learning.	2	0
Detailed and specific instructions from the instructor.	2	0
The curriculum is too small and the content is not much different.	0	1
teachers stopped teaching continuously, at the end of the semester increased to make up classes, those makeup lessons affected projects, and missed deadlines.	0	0
Teachers sometimes teach and sometimes dont, neither teach nor notify, students waste time, effort, and money, then sit and wait and go home.	0	0
need a better, more modern machine room.	0	2
Teachers should do more than a few similar exercises to avoid forgetting or similar but slightly different ways of doing things.	0	0
I didnt expect this subject to be so boring, didnt learn anything from this subject, the teacher was terribly bored, or was late for 3045 minutes, not enthusiastic.	0	0
The teacher misjudged the students grades and abilities.	0	0
did not meet the proposed course outline.	0	1
The teacher should give more practical guidance.	0	0
Friendly faculty, care about students.	2	0
Objectoriented programming subjects should be updated with new, easytounderstand and more specific explanations.	0	1
Enthusiastic teachers, enthusiastic, good communication ability.	2	0
Very good and enthusiastic teacher.	2	0
she spoke a bit low , if the class was noisy it would be hard to hear .	0	0
The exercises she gives are many, and difficult to understand, with the current knowledge of students, it is difficult to learn and do well in her assignments.	0	0
There are few exercises and group activities.	0	1
The lecturers are very enthusiastic, the teaching methods are good, the students grasp the knowledge right in the classroom.	2	0
The guide is quite complete.	2	0
learned a lot from teacher wzjwz163 .	2	0
The teachers knowledge is very good, ensuring class time.	2	0
Currently, I do not see much effect when studying this subject.	0	1
improve projector facilities in the classroom.	0	2
Teaching is not suitable for my learning style.	0	0
explain the new content clearly.	2	0
Classroom is too crowded	0	1
Basic subjects that the teacher did not teach the students thoroughly, causing confusion and loss of foundation.	0	1
The lecturer has not given homework for students to do for 5 lessons per chapter, no need to correct just the answer.	0	0
which our school does not currently have, this is a great loss for us.	0	1
I feel the teacher teaches very well.	2	0
I dont know which teacher officially teaches, but students often leave without notice so that students can wait until the class is almost over and then go home many times.	0	0
There should be more interaction between lecturers and students.	0	3
Friendly, enthusiastic, openminded teachers.	2	0
Teachers have invited companies to present and help students update their practical knowledge.	2	0
Review the attitude of teachers to practice.	0	0
Enthusiastic teacher, solve many exercises.	2	0
His lectures are very enthusiastic.	2	0
the subject is not practical, not attractive to students.	0	1
teach fast	0	0
little homework.	0	1
Lectures are not attractive , the teaching position is not reasonable , the final review is not focused on the problem .	0	0
Enthusiastic teachers, engaging lectures.	2	0
Thanks to the teacher and the lecturer, I have understood this subject a lot	2	0
This subject is quite abstract, so I hope you have more practical connections so that we can understand.	0	1
Need more materials for students.	0	1
increase the number of lessons so that students have more opportunities to ask and answer questions about the subject.	0	1
Enthusiastic teacher easy to understand.	2	0
Practice and theory should be taught side by side.	0	1
fast teacher.	0	0
Class exercises should be introduced at the beginning of the class so that students dont waste time reading the question and can think of solutions at the same time as listening to the lecture.	0	1
Instructor for good exercises.	2	0
New exercise update.	0	1
In class, whoever did the job, the teacher didnt say anything more.	0	0
Dedicated, enthusiastic, interested in students.	2	0
Respond to student inquiries.	2	0
teach too fast.	0	0
Hope you fix the device soon	0	2
This subject needs to be a topic to apply theory to practice, but in class, only a bunch of theories are learned and few people remember that most of them are quite sleepy when they go to class.	0	1
lecturers should innovate teaching methods, avoid harsh, unattractive students.	0	0
enthusiasm , creating an active way for students to approach the subject and participate in related movement programs to improve skills .	2	0
She teaches very passionately, easy to understand.	2	0
does not meet the needs of students.	0	1
He is very enthusiastic with us and this makes me very satisfied.	2	0
His teaching style is very good and easy to understand.	2	0
enthusiastic, cute.	2	0
No project instructions.	0	0
I would like to suggest that the school should supplement the course materials and update the content.	0	1
Copying a lot, wasting time listening to lectures.	0	0
I dont study wzjwz178 this term, the practice teacher has 2 people, so maybe its a mistake.	0	0
Long subject exam students do not do enough time.	0	3
let do many tests .	0	0
In my opinion, you should take the computer lab exam with visual 2013 or higher.	0	2
Need more materials for the course.	0	1
good teacher.	2	0
I hope you can guide me in the most specific way for difficult lessons.	0	0
The teacher needs more exercises and guidance.	0	0
The teachers come to class on time and give lively lectures.	2	0
I see that the teacher only teaches for yes.	0	0
It is necessary to clearly define the purpose of the subject and give students a detailed course outline before starting.	0	1
The teacher talks with students very naturally, sharing practical experiences.	2	0
teach according to the program.	2	0
Provide additional equipment to serve the needs of the subject.	0	2
propose to upgrade the network science lab.	0	2
Great and enthusiastic teacher, lectures are highly practical.	2	0
Go to class on time.	2	0
The teacher provides a lot of new knowledge, the teacher is dedicated and enthusiastic	2	0
there are more examples to illustrate the theory because there are many theoretical parts that are very abstract .	2	0
Subject project requirements should be precisely stated before students begin group work and project work.	0	1
Easy to understand teaching, easy to absorb, focus on some key knowledge.	2	0
The teaching is not very thorough, the points should be more open.	0	0
did not prepare the lecture carefully to be able to answer the questions of the students in class.	0	0
She is quite dedicated to her students.	2	0
Need to reform the content of the exercises , some of the content in the exercises has become outdated .	0	1
Teachers have good knowledge transfer ability.	2	0
for doing lots of exercises.	0	0
The teachers are very dedicated and enthusiastic.	2	0
Information system project instructors need to have a few more meetings with students and set a fixed schedule at school so students can ask questions directly	0	0
Only notice in class will make it difficult to avoid mistakes.	0	3
She wrote in the corner of the board near the lectern, making it difficult to observe sometimes.	0	0
Suggest to install a fan.	0	2
teach well.	2	0
Exercises need more variety.	0	1
speak very softly.	0	0
Sometimes when I do the wrong lesson, the teacher says Im a bit selfdeprecating.	0	0
do not correct the practice exercises.	0	0
I dont quite understand how the practice test is scored.	0	1
Do a lot of homework even though you dont really understand.	0	1
sometimes absent from school without notice on daa .	0	0
The teacher is easy to understand, the class is easy to understand and exciting.	2	0
enthusiastic, inspirational teacher.	2	0
Very detailed teaching, easy to understand and absorb.	2	0
impart good knowledge.	2	0
she is funny.	2	0
if yes, then only guide by theory without doing sample exercises for students.	0	0
She doesnt have many exercises channels for students.	0	0
If you are a good student, you can apply the formula to the class work less than 30 percent of the time, but if you really understand the subject, very few people will understand.	0	3
The teacher is a bit fast.	0	0
little guidance to students during practice hours .	0	0
could not practice any session.	0	3
The teacher teaches the theory part well, grasps the students abilities.	2	0
Enthusiastic teachers, easy to understand, dedicated to students.	2	0
enthusiastic, enthusiastic in class and outside.	2	0
enthusiastic teacher.	2	0
funny teacher, easy to understand, enthusiastic teacher.	2	0
enthusiastic teachers.	2	0
Easy to understand, close to students.	2	0
she teaches very enthusiastically and her materials are very specific and easy to understand, she guides very passionately.	2	0
I hope you try your best in the next semesters.	0	0
More illustrative examples should be given.	0	1
The lecturers are sociable, happy, only teaching passionately to students who are eager to learn.	2	0
The instructor does not teach any practical lessons.	0	0
There should be agreement among subject teachers in the teaching outline.	0	0
There are persona of knowledge that only one half of the class has learned, but the teacher thinks that the unscathed class has already acquire it, so only an overview, the balance of the students are unmanageable to grasp.	0	0
There are parts of knowledge that only half of the class has get word, only the teacher thinks that the whole family has already ascertain it, hence simply an overview, the quietus of the students are difficult to get the picture.	0	0
There represent share of knowledge that only one half of the class experience memorise, merely the teacher thinks that the whole class has already learned it, so only an overview, the rest of the pupil are difficult to grasp.	0	0
There are region of knowledge that merely one half of the class has learned, but the teacher imagine that the whole grade has already learned it, so only an overview, the remainder of the students are difficult to grasp.	0	0
There be parting of knowledge that only half of the stratum has learned, but the instructor thinks that the whole class has already memorize it, thus only an overview, the rest of the students are difficult to grasp.	0	0
There be character of knowledge that only half of the family has memorize, but the teacher thinks that the whole class has already check it, then only if an overview, the rest of the students be difficult to grasp.	0	0
There live parts of knowledge that only one half of the class has pick up, just the instructor cogitate that the unharmed class has already learned it, so only an overview, the rest of the students are difficult to grasp.	0	0
There are component of knowledge that but one half of the division has learned, but the teacher thinks that the whole family has already learned it, so only an overview, the ease of the students are difficult to compass.	0	0
Thither are parts of knowledge that only half of the class give birth larn, but the teacher thinks that the whole grade has already learned it, so only an overview, the sleep of the students are difficult to grasp.	0	0
There are parts of knowledge that only if half of the class has learn, simply the instructor thinks that the whole division has already learned it, so simply an overview, the rest of the students exist difficult to grok.	0	0
There are part of knowledge that only half of the division has learn, simply the teacher thinks that the whole class have already learned it, thence only an overview, the rest of the students are difficult to grasp.	0	0
There are parts of knowledge that only half of the class give learned, but the teacher call back that the whole class has already learned information technology, so only an overview, the sleep of the student are difficult to apprehend.	0	0
There are character of knowledge that only half of the class has see, but the teacher thinks that the unharmed class has already learned it, and then alone an overview, the rest of the students be difficult to comprehend.	0	0
There are parts of knowledge that only one half of the stratum suffer learned, but the instructor thinks that the whole family has already learned information technology, and so only an overview, the rest of the students are difficult to hold on.	0	0
On that point are parts of knowledge that only half of the class hold learned, simply the teacher thinks that the whole form has already learned it, so only if an overview, the rest of the students represent difficult to grasp.	0	0
There be parts of knowledge that only one half of the division has learned, simply the teacher think that the whole class has already learn it, so only an overview, the ease of the students are difficult to grasp.	0	0
There are parts of knowledge that entirely half of the stratum has learned, but the instructor thinks that the whole class has already memorize it, so only an overview, the rest of the scholar are difficult to dig.	0	0
There be parts of knowledge that only half of the class has learn, simply the instructor thinks that the whole class have got already learned it, so only an overview, the rest of the student are difficult to dig.	0	0
There are parts of cognition that only when half of the family deliver get a line, but the teacher thinks that the unscathed class have already learned it, so only an overview, the remainder of the students are difficult to grasp.	0	0
There are parts of noesis that only half of the division has take, but the teacher consider that the whole class hold already learned it, so only an overview, the residual of the students are difficult to grasp.	0	0
In that respect are parts of knowledge that only half of the class have learned, but the teacher thinks that the whole class has already learned it, so only an overview, the repose of the students embody hard to apprehend.	0	0
There are parts of knowledge that only when one half of the class has learned, but the instructor think that the solid class has already learned it, thus only an overview, the rest of the students are difficult to get the picture.	0	0
There are parts of cognition that only half of the class has learned, but the instructor thinks that the whole social class give already get a line information technology, indeed only an overview, the rest of the students are unmanageable to grasp.	0	0
There are parts of knowledge that only one half of the stratum has learned, but the teacher thinks that the whole class has already learned it, thence simply an overview, the rest of the student are difficult to hold on.	0	0
There are part of knowledge that entirely half of the class has study, but the teacher thinks that the unharmed class has already learned it, so only an overview, the rest of the student be difficult to grasp.	0	0
There are office of knowledge that only one half of the class have learned, simply the teacher thinks that the whole category has already get wind information technology, so only an overview, the rest of the students are difficult to grasp.	0	0
There are parts of knowledge that only when one half of the year has learned, but the teacher thinks that the whole class has already learned it, thence only an overview, the residuum of the students are difficult to grasp.	0	0
There follow parts of cognition that only half of the class have learned, but the instructor mean that the whole class have already learned it, so only an overview, the relaxation of the students are unmanageable to grasp.	0	0
At that place are parts of knowledge that only half of the social class has learned, simply the teacher recollect that the whole class has already learned information technology, so simply an overview, the rest of the educatee be difficult to grasp.	0	0
There are parts of knowledge that only half of the form have learned, but the instructor thinks that the unanimous class has already learn it, so only an overview, the respite of the students are difficult to grasp.	0	0
There are parts of cognition that just half of the class has learned, but the instructor consider that the whole year has already learned information technology, so only an overview, the remainder of the students are difficult to grasp.	0	0
Thither are parts of cognition that only half of the class ingest learned, but the teacher thinks that the whole class has already learned information technology, indeed simply an overview, the rest of the pupil are difficult to dig.	0	0
There are part of knowledge that exclusively one half of the class has acquire, but the teacher thinks that the whole class has already learn information technology, thusly only an overview, the rest of the students make up difficult to grasp.	0	0
There are parts of noesis that only one half of the class induce learned, but the teacher suppose that the whole class has already learn it, hence only an overview, the relaxation of the students are difficult to grasp.	0	0
In that respect are parts of knowledge that only half of the class has learned, but the teacher thinks that the hale class has already pick up it, so only an overview, the respite of the students are difficult to hold on.	0	0
There be role of knowledge that only half of the class get learned, just the teacher thinks that the whole class hold already watch it, indeed only an overview, the residuum of the students are difficult to grasp.	0	0
There equal parts of knowledge that only half of the division take in learned, but the instructor think that the whole class have already learned it, so only an overview, the rest of the scholar constitute hard to grasp.	0	0
There are parts of knowledge that just half of the class has learned, but the teacher thinks that the unhurt class has already memorise it, so entirely an overview, the rest of the students exist difficult to apprehend.	0	0
There be portion of knowledge that only one half of the course of study stimulate learned, but the teacher consider that the whole class has already learned it, so only an overview, the remainder of the student be difficult to grasp.	0	0
On that point are parts of cognition that only half of the division has learned, but the teacher thinks that the whole course has already learned it, thus only an overview, the repose of the students be difficult to compass.	0	0
At that place are parts of knowledge that only half of the class has learned, but the teacher thinks that the unharmed class has already ascertain it, so only when an overview, the quietus of the student are difficult to grasp.	0	0
At that place are parts of knowledge that only half of the class get learned, but the teacher recollect that the whole class has already learned it, then only an overview, the quietus of the students equal hard to grasp.	0	0
There constitute voice of knowledge that only one half of the socio economic class has determine, but the teacher thinks that the whole class hold already instruct information technology, so simply an overview, the rest of the students are difficult to grasp.	0	0
There are component part of knowledge that exclusively half of the class has learned, just the teacher thinks that the whole grade has already learned it, therefore simply an overview, the rest of the students are unmanageable to grasp.	0	0
There are part of noesis that only half of the class has see, but the instructor recollect that the whole class have already learned it, so only an overview, the rest of the scholar are difficult to grasp.	0	0
There are parts of knowledge that only one half of the division feature learned, but the instructor thinks that the whole class has already learn it, so only an overview, the rest of the scholarly person are hard to dig.	0	0
There are parts of knowledge that only half of the year has find out, but the instructor thinks that the whole class take already learned information technology, thus only an overview, the rest of the students exist unmanageable to grasp.	0	0
In that respect are parts of knowledge that only one half of the course of instruction has learned, simply the instructor thinks that the whole class has already learned it, and then only an overview, the residual of the students are difficult to grasp.	0	0
There are parts of knowledge that only one half of the class has learned, just the teacher thinks that the whole course hold already learned information technology, so only an overview, the rest of the students are difficult to grasp.	0	0
In that respect are part of cognition that only half of the class has learned, only the teacher thinks that the whole class has already teach it, thusly only an overview, the rest of the student comprise difficult to grasp.	0	0
At that place cost parts of cognition that only when half of the form have learned, but the teacher thinks that the whole class has already learned it, so only an overview, the rest of the students are difficult to grasp.	0	0
There be persona of knowledge that only one half of the course has learned, just the teacher thinks that the whole class has already check it, so only an overview, the rest of the students are difficult to apprehend.	0	0
In that location are parts of knowledge that only half of the class has learned, simply the teacher thinks that the whole class has already determine it, so only an overview, the rest of the student constitute unmanageable to savvy.	0	0
There are persona of knowledge that but half of the class receive get wind, but the teacher think that the whole class has already learned information technology, thus only an overview, the rest of the students are difficult to apprehend.	0	0
There be region of knowledge that simply one half of the class ingest learned, just the teacher thinks that the whole division has already learned it, so only an overview, the rest of the students are unmanageable to compass.	0	0
Thither are parts of knowledge that only half of the class take in learned, but the instructor recollect that the whole class have already learned it, so only an overview, the rest of the scholarly person be difficult to grasp.	0	0
In that respect are parts of knowledge that only one half of the class has learned, merely the teacher thinks that the whole class take already learned it, so only an overview, the residual of the students are unmanageable to grasp.	0	0
There are parts of cognition that only half of the class has learned, but the teacher call up that the unhurt class has already learned it, so solely an overview, the rest of the students live difficult to grasp.	0	0
There are parts of knowledge that only when half of the class have learned, but the teacher think that the whole class has already learned information technology, so only an overview, the residual of the students be difficult to grasp.	0	0
In that respect are parts of knowledge that entirely half of the class has learned, but the teacher thinks that the whole class has already take it, thus only an overview, the rest period of the scholarly person are difficult to dig.	0	0
There are parts of knowledge that only one half of the division has learned, but the instructor thinks that the unanimous class have already learned information technology, so only an overview, the repose of the students be difficult to grasp.	0	0
On that point are parts of noesis that only half of the social class have learned, but the instructor thinks that the whole class has already learned information technology, so only an overview, the rest of the students are difficult to get the picture.	0	0
There are parts of knowledge that only half of the socio economic class has memorise, but the teacher think that the whole class make already check it, so solely an overview, the rest of the students are hard to grasp.	0	0
In that respect are parts of knowledge that only half of the class cause get word, but the instructor thinks that the unhurt class possess already learned it, so exclusively an overview, the rest of the students are difficult to grasp.	0	0
There are parts of knowledge that only half of the class have see, but the teacher retrieve that the whole class has already learned it, so alone an overview, the rest of the educatee are unmanageable to grasp.	0	0
There are role of knowledge that only half of the class has learned, just the instructor consider that the unharmed class have already learned information technology, so only an overview, the rest of the students are difficult to dig.	0	0
There embody parts of knowledge that alone half of the class has learn, but the teacher thinks that the whole class induce already learned information technology, so merely an overview, the rest of the students are difficult to grasp.	0	0
Thither are parts of knowledge that just half of the course of study has learned, but the teacher think that the whole class has already learned information technology, so only an overview, the sleep of the students constitute difficult to grasp.	0	0
There are parts of cognition that only one half of the class has learned, merely the teacher thinks that the whole class has already learned it, so only an overview, the rest of the pupil are unmanageable to grok.	0	0
At that place are parts of noesis that only half of the category has learned, merely the teacher thinks that the whole class has already learned information technology, so only an overview, the rest of the pupil be difficult to grasp.	0	0
There are parts of knowledge that only if half of the class have got check, but the instructor intend that the whole class has already learned it, so only an overview, the balance of the students are difficult to grasp.	0	0
There be parts of noesis that only half of the class has learned, but the teacher thinks that the whole grade has already learned it, thus only an overview, the rest of the scholar are difficult to grasp.	0	0
On that point are parts of knowledge that only half of the class has pick up, but the teacher thinks that the unscathed class has already determine information technology, so only an overview, the rest of the students live unmanageable to grasp.	0	0
There be voice of cognition that only half of the class has learned, only the teacher thinks that the unhurt course has already learned it, so only an overview, the rest of the students are difficult to grasp.	0	0
In that respect cost region of knowledge that only one half of the course has learned, but the instructor thinks that the whole class have already learned it, so only an overview, the rest of the students are difficult to grasp.	0	0
Thither are parts of knowledge that simply half of the class has learned, just the teacher think that the whole class has already learned it, thence only an overview, the eternal rest of the students are unmanageable to grasp.	0	0
On that point are parts of noesis that only half of the class have learned, but the teacher thinks that the whole family sustain already learn it, so only an overview, the rest of the students be difficult to grasp.	0	0
On that point are parts of knowledge that only one half of the grade has learned, but the teacher thinks that the whole class let already learned information technology, so exclusively an overview, the rest of the scholar are unmanageable to grasp.	0	0
There are parts of knowledge that only half of the category receive larn, but the teacher think that the whole class have already learned it, so only an overview, the rest of the bookman personify hard to grasp.	0	0
There be theatrical role of knowledge that only when half of the class has learned, just the teacher thinks that the whole class has already learned it, so only an overview, the rest of the students are difficult to grasp.	0	0
There are part of knowledge that only half of the class get learned, but the teacher thinks that the whole course of study have already learned it, so only when an overview, the relaxation of the educatee are difficult to grasp.	0	0
There are parts of knowledge that but half of the category has learned, merely the teacher thinks that the solid stratum has already learned it, so merely an overview, the rest of the students are hard to grasp.	0	0
There are parts of knowledge that only half of the class has learned, but the teacher think that the whole class has already learned it, so simply an overview, the rest of the educatee be unmanageable to comprehend.	0	0
There are portion of cognition that only half of the class has learned, but the teacher thinks that the unharmed class take in already learned it, thus only an overview, the rest of the pupil are difficult to grasp.	0	0
At that place are parts of knowledge that merely half of the class induce learned, but the instructor think that the whole class has already learned it, thusly only an overview, the rest of the students be difficult to grasp.	0	0
There are parts of knowledge that only half of the class has determine, just the teacher retrieve that the unscathed class has already learned it, so only an overview, the residual of the students comprise difficult to grasp.	0	0
There be function of noesis that just half of the form has learned, merely the teacher believe that the whole class hold already learned it, so only an overview, the rest of the students are difficult to grasp.	0	0
There live parts of knowledge that only half of the class get learned, but the teacher thinks that the whole class let already learned information technology, so alone an overview, the eternal rest of the students are hard to grasp.	0	0
There are parts of knowledge that solely one half of the class has learned, just the instructor thinks that the unanimous class has already learned it, thusly only an overview, the rest of the students are unmanageable to grasp.	0	0
There be section of noesis that only half of the class has learned, but the teacher thinks that the whole class have already learned information technology, so only an overview, the rest of the student are difficult to grasp.	0	0
At that place be parts of knowledge that only half of the class induce learned, but the instructor thinks that the whole class has already learned it, so only an overview, the rest period of the students are difficult to grasp.	0	0
There are parts of knowledge that only one half of the socio economic class have get word, but the teacher thinks that the whole class has already learn information technology, therefore only an overview, the rest of the students are hard to grasp.	0	0
There are parts of knowledge that only half of the class has get wind, simply the teacher think that the whole class has already learned it, so only an overview, the rest of the students live difficult to savvy.	0	0
There be parts of knowledge that just one half of the grade has get word, but the instructor think that the whole class has already hear it, so only an overview, the rest of the pupil are difficult to grasp.	0	0
There are parts of knowledge that but one half of the class has learned, simply the teacher thinks that the unhurt stratum has already learned it, so only an overview, the rest of the students represent difficult to savvy.	0	0
There constitute parts of knowledge that only half of the class have learned, but the teacher thinks that the whole class has already hear information technology, so only an overview, the eternal rest of the students are difficult to grok.	0	0
There are parts of noesis that only one half of the class has learned, but the teacher thinks that the unanimous family has already see it, so only an overview, the rest period of the students make up difficult to grasp.	0	0
There personify parts of cognition that only half of the family have learned, only the instructor thinks that the whole class have already learned it, so only an overview, the rest of the pupil are difficult to grasp.	0	0
There are parts of knowledge that only one half of the grade has learned, but the teacher call back that the whole class has already learned it, so only if an overview, the rest of the pupil be difficult to grok.	0	0
There are parts of knowledge that only half of the form have find out, but the teacher thinks that the whole class give birth already memorise information technology, so only an overview, the rest of the students are difficult to grasp.	0	0
There are parts of knowledge that only half of the class has check, but the teacher think that the unharmed class has already learned it, so only an overview, the rest of the students are difficult to hold on.	0	0
There are part of knowledge that only half of the class has pick up, but the instructor thinks that the unharmed class ingest already learned it, so only an overview, the eternal rest of the students are difficult to grok.	0	0
There are part of knowledge that solely one half of the class has learned, only the teacher thinks that the whole class has already learned it, indeed exclusively an overview, the residuum of the students are difficult to grasp.	0	0
There are part of knowledge that only one half of the class receive learned, only the teacher thinks that the whole class has already learned information technology, therefore exclusively an overview, the rest of the students are hard to grasp.	0	0
There are parts of noesis that only one half of the class has learned, only the teacher thinks that the hale class has already learned it, thence only an overview, the rest of the scholarly person are unmanageable to apprehend.	0	0
There be parts of knowledge that only if half of the class has learned, merely the teacher thinks that the unhurt class has already learned it, so only an overview, the quietus of the educatee are difficult to grasp.	0	0
There are parts of knowledge that entirely half of the grade stimulate read, but the teacher call back that the whole class have already learned it, and then only an overview, the rest of the students are difficult to grasp.	0	0
There be portion of knowledge that exclusively one half of the class has learned, but the teacher thinks that the whole class has already check information technology, so only an overview, the rest of the scholarly person are difficult to grasp.	0	0
There be parts of knowledge that but one half of the class has learned, but the instructor thinks that the whole category has already get word it, so simply an overview, the rest of the students are difficult to grasp.	0	0
There personify parts of knowledge that only half of the class has learned, just the teacher thinks that the whole social class has already learn it, so only an overview, the relief of the students be difficult to grasp.	0	0
There be component of knowledge that only half of the class has learned, only the teacher thinks that the whole class has already learn it, so only an overview, the rest of the pupil are difficult to apprehend.	0	0
There are parts of knowledge that only one half of the course of study has learned, but the teacher remember that the whole class has already learned information technology, thus entirely an overview, the rest of the students are difficult to grasp.	0	0
Thither are parts of knowledge that only half of the class has learned, but the teacher consider that the whole class take already learned it, then merely an overview, the quietus of the students are difficult to comprehend.	0	0
There are parts of noesis that only half of the class let ascertain, but the teacher thinks that the whole class has already learned it, so just an overview, the eternal sleep of the students are difficult to grasp.	0	0
There be part of knowledge that solely one half of the class has hear, but the teacher thinks that the unharmed family has already learned it, so only an overview, the rest of the students are difficult to grasp.	0	0
In that location are part of knowledge that only half of the class make learn, but the teacher thinks that the solid class has already learn it, so only an overview, the residuum of the scholar are difficult to grasp.	0	0
Thither exist parts of knowledge that only one half of the class possess learned, but the instructor thinks that the whole class has already read it, so only an overview, the rest of the students are difficult to grasp.	0	0
At that place are parts of noesis that only one half of the class has learned, just the teacher thinks that the whole course of study take in already con it, so only an overview, the residue of the students are difficult to grasp.	0	0
On that point are parts of cognition that simply one half of the grade has learn, but the teacher thinks that the whole class has already learned information technology, so only an overview, the residual of the students are difficult to grasp.	0	0
Thither are parts of knowledge that only half of the family has learned, but the teacher thinks that the unanimous class has already learned it, thusly solely an overview, the quietus of the student are unmanageable to grasp.	0	0
There are parts of knowledge that only half of the class has get wind, but the instructor thinks that the unharmed course of study has already learn it, so only an overview, the rest of the students are difficult to grasp.	0	0
There make up parts of knowledge that only if half of the division has discover, merely the teacher thinks that the whole course of instruction has already learned it, so only an overview, the repose of the students are difficult to grasp.	0	0
There are parts of knowledge that only half of the class has hear, but the teacher thinks that the hale class hold already study information technology, and then only an overview, the rest of the students are difficult to grasp.	0	0
There cost parts of knowledge that solely one half of the class has learned, simply the teacher think that the whole class has already learned information technology, and then only an overview, the rest of the students are difficult to grasp.	0	0
On that point are parts of knowledge that only half of the social class cause learned, simply the teacher thinks that the whole class has already get wind it, so only an overview, the rest of the scholarly person personify difficult to get the picture.	0	0
There personify role of noesis that only half of the category has learned, but the teacher thinks that the whole class has already learned it, so only an overview, the rest of the students are difficult to grok.	0	0
There cost parts of knowledge that only one half of the class has get wind, but the teacher think that the whole class has already learned it, then only an overview, the rest of the educatee are difficult to grasp.	0	0
There are parts of knowledge that only one half of the class has learn, but the teacher thinks that the whole course has already learned it, indeed but an overview, the relief of the students are difficult to grasp.	0	0
There are parts of knowledge that only one half of the class stimulate learned, merely the teacher thinks that the unscathed class ingest already learned it, thus only an overview, the rest of the students constitute unmanageable to comprehend.	0	0
There are parts of cognition that merely half of the class has learned, but the teacher think that the whole class has already learned it, and so but an overview, the rest period of the student are difficult to get the picture.	0	0
There are parts of cognition that just half of the course of instruction has learned, merely the teacher thinks that the hale class has already learned information technology, then only an overview, the rest of the students are difficult to grasp.	0	0
In that respect are parts of cognition that only half of the class has learned, just the teacher thinks that the whole family has already learned it, so alone an overview, the rest of the scholar be difficult to grasp.	0	0
There be function of knowledge that only one half of the class has learned, only the instructor thinks that the whole class has already learned it, so only an overview, the rest of the students are hard to grasp.	0	0
There are parts of knowledge that simply half of the form has learned, only the teacher opine that the whole class cause already learned it, so only an overview, the rest of the students are difficult to apprehend.	0	0
In that respect are parts of knowledge that only half of the class have learned, only the teacher thinks that the whole class has already learned it, so only an overview, the rest of the students be hard to compass.	0	0
There embody parts of knowledge that only if half of the class has learned, only the instructor think that the whole class has already teach it, so only an overview, the rest of the students are hard to grasp.	0	0
There are parts of knowledge that only half of the class has learned, but the teacher think that the whole class has already learn information technology, thus merely an overview, the repose of the students be difficult to grasp.	0	0
There are parts of knowledge that alone half of the class has learned, but the teacher recollect that the whole social class has already learned it, thusly but an overview, the rest of the educatee make up difficult to grasp.	0	0
There equal parts of knowledge that only one half of the class has learned, just the instructor thinks that the whole class has already learned information technology, so only an overview, the rest of the students are unmanageable to grasp.	0	0
There are parts of knowledge that only half of the class have learned, but the teacher thinks that the hale class make already hear it, thus only an overview, the eternal rest of the scholar are difficult to grasp.	0	0
There are parts of noesis that only one half of the class has learned, but the teacher suppose that the unanimous class have already learned information technology, so simply an overview, the rest of the student are difficult to get the picture.	0	0
In that respect equal parts of knowledge that only half of the class has learned, but the teacher call back that the hale class stimulate already discover information technology, so only an overview, the rest of the students are unmanageable to grasp.	0	0
Thither are parts of knowledge that only one half of the class has learned, only the instructor think that the whole class get already find out it, and so only an overview, the rest of the students are unmanageable to grasp.	0	0
There are function of noesis that only half of the class has learned, but the teacher mean that the whole class has already learned information technology, hence only an overview, the relaxation of the students are difficult to grasp.	0	0
There be parts of knowledge that only half of the year give learned, but the instructor thinks that the whole class has already learned information technology, and so exclusively an overview, the rest of the students are difficult to grasp.	0	0
There are parts of noesis that alone one half of the class has learned, merely the instructor thinks that the whole class has already learned it, so only an overview, the rest of the students are difficult to grasp.	0	0
There are parts of knowledge that only half of the class has learned, but the teacher think that the solid year own already learned it, so solely an overview, the rest of the students are difficult to grasp.	0	0
There be part of knowledge that solely half of the class has learned, but the teacher think that the unharmed class has already learned it, so only an overview, the rest of the pupil are difficult to grasp.	0	0
There are parts of knowledge that merely one half of the class has learned, simply the teacher thinks that the whole class has already teach it, therefore only an overview, the rest of the scholarly person are difficult to grasp.	0	0
There are portion of knowledge that just half of the social class induce learned, but the teacher think that the whole class has already learned information technology, so simply an overview, the repose of the students are difficult to grasp.	0	0
In that location are parts of knowledge that only half of the course has learned, but the teacher thinks that the unscathed class has already learned information technology, so only an overview, the rest of the scholarly person are difficult to grasp.	0	0
Thither are division of knowledge that only half of the course of study has learned, but the teacher thinks that the whole class has already learned it, indeed only if an overview, the eternal sleep of the students are difficult to grasp.	0	0
There are portion of knowledge that only if half of the class has get word, but the teacher thinks that the unhurt class has already learned it, thusly only an overview, the repose of the students are unmanageable to grasp.	0	0
There constitute parts of knowledge that only half of the class has learned, only the teacher thinks that the whole class has already con information technology, so merely an overview, the rest of the student are hard to grasp.	0	0
There are parts of knowledge that only half of the course of instruction has learned, merely the teacher thinks that the solid year has already learned it, and so solely an overview, the rest of the students are hard to grasp.	0	0
There are parts of knowledge that only one half of the category take in find out, but the teacher thinks that the whole stratum has already learned it, so but an overview, the rest of the scholar are difficult to grasp.	0	0
There be role of noesis that exclusively one half of the class feature learned, but the teacher thinks that the unharmed class has already learned it, so only an overview, the rest of the students are difficult to grasp.	0	0
There make up parts of knowledge that only when one half of the class have learned, merely the teacher thinks that the whole class has already learned it, so only an overview, the ease of the students are difficult to apprehend.	0	0
There are parts of knowledge that only if half of the category has learn, but the teacher think that the whole class has already learn information technology, hence only an overview, the rest of the students be difficult to grasp.	0	0
There exist parts of cognition that only half of the form has learned, but the instructor thinks that the hale class has already learned information technology, so only an overview, the rest of the student are difficult to savvy.	0	0
In that location be parts of knowledge that only half of the category has learned, but the teacher thinks that the unhurt class has already learned it, so only an overview, the rest period of the scholarly person be difficult to grasp.	0	0
There be parts of knowledge that only half of the class make learned, but the teacher thinks that the whole class experience already learned information technology, therefore alone an overview, the residue of the students are unmanageable to comprehend.	0	0
There are parts of knowledge that exclusively one half of the course of instruction has learn, but the teacher thinks that the whole class has already learned it, so just an overview, the rest of the students are difficult to dig.	0	0
There are parts of knowledge that only one half of the stratum has learned, but the teacher thinks that the whole class has already discover it, so but an overview, the rest of the scholar are hard to dig.	0	0
There are parts of noesis that only when half of the family induce learned, merely the teacher thinks that the whole class has already learned information technology, so only when an overview, the rest of the students are difficult to dig.	0	0
In that respect are parts of knowledge that only half of the class hold check, simply the teacher thinks that the whole class has already pick up it, so only an overview, the rest of the bookman are difficult to compass.	0	0
In that location are parts of knowledge that only half of the class has learned, but the teacher think that the whole class has already learned it, so only an overview, the eternal rest of the scholar are hard to grasp.	0	0
In that respect are theatrical role of knowledge that only half of the category has learned, just the instructor thinks that the whole social class has already learned it, so only an overview, the rest of the students are difficult to grasp.	0	0
There are parts of knowledge that only if one half of the class has learned, but the teacher thinks that the unhurt class has already learn it, then only an overview, the rest of the students are unmanageable to grasp.	0	0
There are parts of knowledge that only half of the class has get word, merely the teacher thinks that the whole socio economic class has already check information technology, so only an overview, the rest of the educatee are difficult to grasp.	0	0
There personify piece of knowledge that only one half of the division has learned, but the teacher thinks that the unscathed class has already teach information technology, so simply an overview, the rest of the bookman are difficult to grasp.	0	0
There are parts of knowledge that only half of the socio economic class have learned, only the instructor thinks that the whole form experience already learned it, so entirely an overview, the relaxation of the students are difficult to grasp.	0	0
There are parts of knowledge that only if half of the course of instruction has learned, just the instructor retrieve that the whole class have already learned it, so only an overview, the rest of the students are hard to grasp.	0	0
In that respect be part of knowledge that only half of the class has see, but the teacher believe that the whole class bear already learn information technology, so only an overview, the rest of the students are difficult to grasp.	0	0
There equal part of knowledge that only half of the class has memorise, just the teacher intend that the whole class has already learned information technology, so only an overview, the rest of the students are difficult to grasp.	0	0
There are parts of knowledge that exclusively half of the class has see, but the teacher remember that the solid class has already learned it, thence only an overview, the remainder of the students are difficult to grasp.	0	0
There are parts of knowledge that only half of the class own learned, but the teacher cogitate that the solid class has already learned information technology, and so only an overview, the rest of the students are difficult to grasp.	0	0
There are parts of cognition that only half of the class have learned, but the teacher thinks that the whole class has already learned it, so only an overview, the rest of the student are difficult to grasp.	0	0
There be parts of knowledge that exclusively half of the class has learned, simply the instructor thinks that the whole class has already learned information technology, so but an overview, the rest of the students are difficult to grasp.	0	0
There are part of noesis that exclusively half of the class has learned, but the teacher thinks that the whole class has already learned it, therefore only an overview, the residuum of the students be hard to grasp.	0	0
There be parts of knowledge that only one half of the class has learned, but the instructor thinks that the whole grade has already learned it, so entirely an overview, the eternal sleep of the pupil are difficult to grasp.	0	0
There are part of cognition that only one half of the course of study has find out, merely the teacher thinks that the whole class receive already learned information technology, so only an overview, the rest of the students are difficult to grasp.	0	0
In that location make up parts of knowledge that only half of the year has find out, but the teacher thinks that the unscathed category have already learned it, so only an overview, the rest of the students are hard to grasp.	0	0
There are parts of cognition that only half of the year has learned, simply the teacher think that the whole class has already learned it, and so only an overview, the rest of the student represent difficult to grasp.	0	0
Thither are parts of knowledge that alone half of the class has learned, merely the instructor cerebrate that the whole class has already learned it, so only an overview, the rest of the student personify difficult to grasp.	0	0
Thither follow parts of knowledge that only half of the class has learned, only the teacher thinks that the whole grade have already get wind it, so only an overview, the rest of the student are difficult to grasp.	0	0
There are parts of knowledge that only if one half of the class has learned, but the teacher consider that the whole socio economic class experience already learned it, so only an overview, the rest of the students are unmanageable to grasp.	0	0
There are parts of knowledge that only half of the class has check, but the instructor call back that the whole class has already get wind information technology, and so only an overview, the rest of the scholarly person are difficult to savvy.	0	0
There are parts of knowledge that only half of the class feature learned, but the instructor thinks that the whole class have already learned it, so solely an overview, the rest of the students be difficult to savvy.	0	0
There are region of noesis that just half of the class has learned, only the teacher thinks that the whole class has already learn it, so solely an overview, the rest of the students are difficult to comprehend.	0	0
There represent portion of cognition that only half of the class has teach, just the teacher thinks that the whole class has already learned it, so only when an overview, the residual of the students are difficult to grasp.	0	0
There are parts of knowledge that only half of the division has learned, but the instructor thinks that the whole social class receive already learned it, so only an overview, the rest of the students are difficult to grasp.	0	0
There be part of knowledge that only half of the course have learned, but the instructor thinks that the whole division has already learn it, so only an overview, the remainder of the students are hard to grasp.	0	0
There are piece of knowledge that merely half of the class make learned, but the instructor thinks that the whole class have already learned it, so only an overview, the rest of the students personify hard to grasp.	0	0
There are role of knowledge that only one half of the class has learned, but the instructor thinks that the whole class has already learned it, so only an overview, the quietus of the scholarly person are difficult to apprehend.	0	0
In that location are parts of noesis that only one half of the class has get wind, only the teacher thinks that the unscathed class has already get wind it, so only when an overview, the eternal sleep of the students are difficult to grasp.	0	0
There are part of knowledge that only half of the class has see, but the teacher thinks that the whole class has already learned information technology, so merely an overview, the rest of the scholarly person are difficult to grasp.	0	0
There live division of knowledge that only half of the class has larn, but the teacher call up that the whole class has already learned it, so simply an overview, the rest of the students make up hard to grasp.	0	0
At that place are share of knowledge that only half of the class have got take, merely the teacher thinks that the whole class has already learned it, so only an overview, the rest of the students are unmanageable to grasp.	0	0
There embody part of knowledge that only half of the class sustain get wind, but the teacher thinks that the solid class has already learned it, then only an overview, the rest of the students be difficult to grasp.	0	0
There equal parts of cognition that only half of the class has teach, but the teacher thinks that the whole class has already learned it, therefore exclusively an overview, the rest of the scholarly person are difficult to grasp.	0	0
There embody part of knowledge that only half of the class has learned, just the teacher thinks that the hale class has already learned it, so only an overview, the rest of the scholar are difficult to hold on.	0	0
There are parts of noesis that only half of the socio economic class has learned, but the teacher opine that the whole form has already learned information technology, so only an overview, the rest of the student are difficult to hold on.	0	0
There are theatrical role of knowledge that only half of the class has learned, but the teacher cogitate that the whole class have got already larn information technology, so only an overview, the remainder of the pupil are hard to grasp.	0	0
There are division of cognition that only one half of the course has learn, but the instructor thinks that the whole class has already learned it, so only an overview, the eternal rest of the student be difficult to grasp.	0	0
There comprise parts of knowledge that only half of the class make learned, but the teacher call back that the whole class get already study it, so merely an overview, the rest of the students are unmanageable to grasp.	0	0
There are parts of noesis that only one half of the class has learned, but the instructor thinks that the whole class consume already learned it, thus only an overview, the rest of the students are hard to hold on.	0	0
There are parts of cognition that only half of the course has learned, but the teacher thinks that the hale course get already learned it, so only an overview, the rest of the students be difficult to grasp.	0	0
There are parts of knowledge that only half of the class has watch, but the teacher thinks that the unscathed class have already learned information technology, thus only an overview, the eternal rest of the students are unmanageable to grasp.	0	0
There be portion of cognition that only one half of the class has learned, but the teacher thinks that the whole class has already learned it, hence simply an overview, the rest of the pupil are difficult to grasp.	0	0
There are component part of cognition that only one half of the class has learned, only the teacher thinks that the whole class has already learned it, thus only an overview, the rest period of the scholar represent difficult to grasp.	0	0
There are parts of knowledge that only half of the class throw learned, but the teacher thinks that the solid socio economic class has already learned it, so only when an overview, the rest of the scholar equal difficult to hold on.	0	0
There be parts of cognition that only half of the class have learned, but the instructor thinks that the unanimous form has already check it, thus only an overview, the rest of the students are difficult to grasp.	0	0
There are parts of knowledge that only half of the class has see, but the teacher thinks that the whole social class take already learned it, then alone an overview, the rest of the students live difficult to grasp.	0	0
Thither are role of cognition that only half of the class has learned, but the teacher think that the solid category get already learned it, and then only an overview, the rest of the students are unmanageable to grasp.	0	0
In that respect are section of knowledge that only when half of the class has learned, but the teacher thinks that the unanimous course has already learned it, so only an overview, the rest of the students are unmanageable to grasp.	0	0
There are parts of knowledge that only half of the class has see, but the teacher thinks that the whole social class have already learned information technology, thence merely an overview, the rest period of the pupil are difficult to grasp.	0	0
There are component part of knowledge that but half of the class has learned, but the instructor suppose that the whole class have already learn it, so only an overview, the rest of the students are difficult to grasp.	0	0
There represent part of cognition that only half of the class has learn, but the teacher thinks that the whole class experience already learned it, so only an overview, the relief of the pupil are difficult to grasp.	0	0
There are parts of knowledge that only half of the class has learn, but the teacher thinks that the whole class has already learned it, and then exclusively an overview, the rest of the scholar follow difficult to grasp.	0	0
There comprise parts of knowledge that exclusively half of the class have learned, but the instructor thinks that the whole class has already learned it, so only an overview, the rest period of the students are unmanageable to grasp.	0	0
There be parts of noesis that just half of the class has learned, but the teacher thinks that the unanimous class has already larn it, so only an overview, the rest of the students are difficult to compass.	0	0
There make up parts of knowledge that only half of the class has learned, but the instructor retrieve that the whole class has already learned information technology, so just an overview, the rest of the students are difficult to grasp.	0	0
There represent parts of knowledge that only one half of the class has study, but the teacher thinks that the hale class has already learned information technology, so only an overview, the rest of the scholarly person are unmanageable to grasp.	0	0
There are parts of noesis that only one half of the class has learned, but the teacher thinks that the whole class receive already learned it, so only an overview, the rest of the students exist difficult to grok.	0	0
There comprise parts of knowledge that only half of the class has learned, but the instructor think that the whole stratum accept already get a line it, so only an overview, the rest of the students are difficult to grasp.	0	0
There are parts of knowledge that alone half of the socio economic class have learned, merely the teacher thinks that the whole grade has already learned it, so only an overview, the rest of the students be unmanageable to grasp.	0	0
There are office of cognition that only half of the class suffer learned, but the teacher conceive that the whole course has already learned it, hence only an overview, the rest of the students are difficult to grasp.	0	0
There be parts of knowledge that only half of the course of instruction has learned, but the instructor thinks that the whole class has already learned it, thus only an overview, the ease of the student be difficult to grasp.	0	0
There are parts of cognition that only if one half of the family has see, but the teacher cerebrate that the whole class have already learned it, so only an overview, the rest of the students are difficult to grasp.	0	0
There are parts of knowledge that only half of the class has read, but the teacher thinks that the whole class has already learned information technology, indeed only an overview, the rest period of the student are difficult to grasp.	0	0
In that respect are parts of noesis that only half of the class get read, but the teacher thinks that the whole class has already memorise it, so only an overview, the rest of the student are hard to savvy.	0	0
There constitute parts of knowledge that only one half of the class has learned, but the teacher thinks that the unscathed class get already learned it, so only an overview, the rest of the pupil are difficult to grasp.	0	0
There live parts of cognition that only half of the class have learn, but the teacher thinks that the whole class has already learned it, so alone an overview, the residuum of the students are difficult to grok.	0	0
There live parts of knowledge that alone half of the class have learned, only the teacher thinks that the whole class has already learned it, then only an overview, the rest of the scholarly person are hard to grasp.	0	0
In that respect are parts of cognition that only half of the class has learned, but the instructor thinks that the whole class has already learned it, so simply an overview, the rest period of the student are difficult to grasp.	0	0
At that place constitute parts of knowledge that simply half of the class give birth learned, just the instructor thinks that the whole class has already ascertain it, so only an overview, the rest of the students are hard to grasp.	0	0
There are parts of knowledge that only half of the class deliver acquire, but the teacher thinks that the unscathed class accept already learned it, thence only an overview, the rest of the students are hard to grasp.	0	0
There be parts of knowledge that only one half of the course has learned, but the teacher conceive that the whole class has already learned it, so only an overview, the rest of the students be difficult to get the picture.	0	0
There are parts of knowledge that only half of the course has learned, but the teacher thinks that the hale grade get already learned it, thus only an overview, the rest of the students exist difficult to grasp.	0	0
There are parts of knowledge that only half of the class consume learned, but the teacher thinks that the whole class has already learned information technology, so only an overview, the rest of the scholar are hard to grasp.	0	0
At that place are office of knowledge that only half of the class feature learned, but the teacher think that the hale class has already learned it, so only an overview, the rest of the students be difficult to compass.	0	0
There are parts of knowledge that only one half of the class has see, only the teacher thinks that the whole class have already learn it, so entirely an overview, the respite of the students are difficult to get the picture.	0	0
There are persona of cognition that only half of the division has learned, but the teacher thinks that the whole course has already see information technology, so only when an overview, the sleep of the students are difficult to grasp.	0	0
There are parts of knowledge that just one half of the class have larn, only the instructor think that the whole class has already learned information technology, so only an overview, the rest of the students are unmanageable to grasp.	0	0
There equal parts of cognition that only half of the class receive learned, but the teacher thinks that the whole class has already learned it, then entirely an overview, the rest of the bookman be difficult to grasp.	0	0
There be parts of knowledge that only half of the course of study have learned, but the teacher thinks that the unhurt grade has already learned information technology, so only an overview, the residual of the students be difficult to grasp.	0	0
There are parts of cognition that only half of the stratum take learned, but the instructor thinks that the whole class have already learned information technology, so only if an overview, the relaxation of the students embody difficult to grasp.	0	0
There represent parts of knowledge that alone one half of the class has take, but the instructor thinks that the unhurt class has already learned it, so only an overview, the rest of the students are difficult to grasp.	0	0
There are parts of knowledge that only half of the class has learned, simply the teacher thinks that the whole class has already learned it, and so only an overview, the residue of the bookman constitute difficult to grasp.	0	0
There are theatrical role of knowledge that only half of the class possess learned, but the instructor thinks that the unhurt class make already learned information technology, so only an overview, the relaxation of the students be difficult to grasp.	0	0
There are component part of knowledge that only half of the class take learned, but the teacher suppose that the whole class have already memorise it, so alone an overview, the sleep of the students are hard to get the picture.	0	0
There make up parts of knowledge that only half of the class has learned, merely the teacher thinks that the whole class has already learned information technology, so only an overview, the rest of the educatee are difficult to dig.	0	0
There are parts of knowledge that only half of the class have got learned, but the instructor thinks that the whole class induce already learned information technology, so only an overview, the rest of the students are unmanageable to compass.	0	0
There are persona of knowledge that only one half of the class has learned, but the teacher think that the unharmed socio economic class have already learned it, so only an overview, the rest of the scholarly person be difficult to grasp.	0	0
There are component part of cognition that only half of the class has learned, but the instructor recollect that the whole class has already watch information technology, so only an overview, the residue of the students are difficult to grasp.	0	0
There are parts of knowledge that only half of the class has learned, only the teacher thinks that the whole family has already learned information technology, so only an overview, the rest of the student make up difficult to grasp.	0	0
There be constituent of knowledge that entirely half of the class has learned, but the teacher believe that the unhurt year has already learned it, so only an overview, the rest of the student are difficult to grasp.	0	0
In that respect are parts of knowledge that only one half of the class has learned, merely the instructor thinks that the whole class has already learned it, therefore only an overview, the rest of the student be difficult to grasp.	0	0
There are constituent of cognition that only one half of the class has learned, but the teacher thinks that the hale stratum has already take information technology, so only an overview, the rest of the students are difficult to grasp.	0	0
There are percentage of knowledge that only half of the class has learned, just the teacher thinks that the unscathed class have already con it, so but an overview, the residual of the students are difficult to grasp.	0	0
There are parts of knowledge that only half of the family has learned, but the instructor thinks that the whole class has already learned information technology, so entirely an overview, the rest of the student are difficult to apprehend.	0	0
There are parts of knowledge that only half of the class has learned, but the instructor conceive that the hale grade has already learn information technology, and so only an overview, the residue of the students are difficult to grasp.	0	0
In that location are parts of cognition that only half of the class has get wind, but the teacher thinks that the whole class has already learned it, thence only an overview, the rest period of the educatee be difficult to grasp.	0	0
There are part of knowledge that only one half of the class has learned, simply the teacher thinks that the whole class have already learn it, thus only an overview, the rest of the students are hard to grasp.	0	0
There are portion of noesis that only half of the class has take, but the teacher thinks that the whole class receive already learned it, so only an overview, the residual of the students are difficult to hold on.	0	0
At that place are parts of knowledge that only half of the year has learned, but the instructor thinks that the whole stratum has already learned information technology, thus only an overview, the rest of the students are unmanageable to grasp.	0	0
On that point be parts of knowledge that only when half of the class has take, but the teacher thinks that the whole class has already learned it, so only an overview, the rest of the student are unmanageable to grasp.	0	0
There are parts of cognition that alone half of the class has learned, merely the teacher thinks that the whole class has already learned it, so only an overview, the residual of the students are difficult to grasp.	0	0
There are parts of cognition that only half of the class induce learned, simply the teacher thinks that the whole class has already find out it, then only an overview, the rest of the students are difficult to grasp.	0	0
At that place are parts of knowledge that only half of the class has find out, just the instructor thinks that the whole course of study have already learned it, so only an overview, the rest of the scholarly person are difficult to grasp.	0	0
There are parts of knowledge that entirely one half of the class has learned, just the teacher think that the unharmed class have already learned it, so only an overview, the rest of the students are difficult to grasp.	0	0
There are character of knowledge that just half of the class have learned, but the instructor thinks that the whole class has already learned it, thus only an overview, the rest of the students are difficult to grasp.	0	0
There are part of knowledge that only half of the grade has hear, simply the instructor thinks that the whole class has already learned it, thus only an overview, the rest of the students are difficult to savvy.	0	0
At that place are parts of knowledge that alone half of the class has learned, but the instructor thinks that the unhurt class has already learn information technology, so simply an overview, the rest of the students live difficult to grasp.	0	0
On that point are persona of knowledge that only half of the class have learned, but the teacher recall that the whole class have got already see it, so exclusively an overview, the rest of the pupil are difficult to grasp.	0	0
There are parts of noesis that only half of the class has find out, but the teacher thinks that the whole class has already see it, so alone an overview, the rest of the students cost hard to hold on.	0	0
On that point are parts of knowledge that only half of the grade has learned, merely the instructor thinks that the whole class has already learned it, so only an overview, the rest period of the bookman are difficult to grasp.	0	0
In that location are parts of knowledge that only one half of the class has learned, but the instructor thinks that the whole course of study has already learned it, thence just an overview, the rest of the scholar are difficult to apprehend.	0	0
There are parts of knowledge that only half of the class has learned, but the teacher thinks that the hale family has already find out information technology, so only an overview, the residual of the students are difficult to grasp.	0	0
There are parts of knowledge that only when half of the category has learned, only the instructor thinks that the whole stratum has already learned information technology, so only an overview, the rest of the students be difficult to grasp.	0	0
There are parts of knowledge that only one half of the class has learned, merely the instructor guess that the unhurt class has already learned information technology, so only an overview, the rest of the students are unmanageable to grasp.	0	0
There are share of knowledge that only one half of the class has learned, merely the teacher thinks that the unharmed class has already learned it, so only an overview, the relief of the students are hard to grasp.	0	0
There are parts of knowledge that but half of the class has see, but the instructor intend that the whole class has already learned it, thence only an overview, the rest of the students comprise difficult to grasp.	0	0
There are parts of cognition that but one half of the class has learned, but the teacher thinks that the whole class has already determine it, so only an overview, the respite of the students are hard to grasp.	0	0
There are parts of knowledge that entirely one half of the year has learned, but the teacher call back that the whole division has already learned it, indeed just an overview, the relief of the students are difficult to grasp.	0	0
There exist parts of knowledge that solely half of the class has learned, but the instructor thinks that the whole class has already learned information technology, and so only an overview, the rest of the students are difficult to grasp.	0	0
In that location are parts of noesis that only half of the class has learned, but the instructor thinks that the whole class has already learned information technology, hence only an overview, the rest of the students are difficult to grasp.	0	0
At that place be parts of cognition that only half of the year has memorize, but the teacher mean that the whole class has already learned it, so only an overview, the rest of the students are unmanageable to grasp.	0	0
On that point are parts of knowledge that only half of the class has learned, only the teacher thinks that the unscathed class has already learned information technology, so only if an overview, the rest of the students are difficult to apprehend.	0	0
There are parts of cognition that only half of the class has learned, but the teacher thinks that the unhurt class has already learned it, indeed but an overview, the ease of the students be hard to savvy.	0	0
There are parts of knowledge that only one half of the form has learned, but the instructor thinks that the whole class accept already learned it, and then only an overview, the rest of the bookman are difficult to get the picture.	0	0
In that location are parts of knowledge that only half of the class get check, but the instructor thinks that the whole class has already learned information technology, so alone an overview, the rest of the bookman are difficult to grasp.	0	0
In that location be portion of knowledge that only half of the class deliver learn, simply the teacher think that the whole class has already learned it, so only an overview, the rest of the students are difficult to grasp.	0	0
In that location are parts of knowledge that only half of the class has instruct, but the instructor thinks that the whole course has already hear it, so only an overview, the residual of the students be difficult to comprehend.	0	0
There make up percentage of knowledge that only half of the class have learned, merely the instructor thinks that the whole course of instruction has already learned it, so only an overview, the rest of the students are hard to grasp.	0	0
There equal portion of cognition that only one half of the class has learned, but the teacher thinks that the whole socio economic class accept already learned it, and so only an overview, the rest of the scholarly person are difficult to grasp.	0	0
There are parts of knowledge that only half of the class have learned, but the teacher thinks that the whole class stimulate already learned information technology, hence only an overview, the respite of the students are difficult to grasp.	0	0
There are part of knowledge that only half of the class has learned, simply the teacher thinks that the whole class has already learned it, so only an overview, the rest of the scholar are difficult to comprehend.	0	0
There are parts of knowledge that only half of the division have learned, but the instructor thinks that the whole class experience already learned it, so only an overview, the rest of the students be hard to compass.	0	0
There follow part of cognition that only half of the class has learned, but the teacher thinks that the solid class has already learn it, so only an overview, the rest of the students are difficult to grasp.	0	0
There are portion of knowledge that only half of the class have teach, but the teacher believe that the unanimous class has already learned it, so just an overview, the rest of the students are difficult to grasp.	0	0
There are part of cognition that only half of the class has see, but the teacher thinks that the unharmed class has already learned it, so only an overview, the rest of the bookman comprise hard to grasp.	0	0
There are parts of knowledge that only half of the course of instruction has learned, but the instructor thinks that the whole course has already learn it, so only an overview, the rest of the students are unmanageable to grasp.	0	0
There are parts of cognition that only half of the class get learned, but the instructor think that the whole class has already watch information technology, so exclusively an overview, the rest of the students are unmanageable to grasp.	0	0
There are parts of cognition that only half of the class experience learned, but the instructor opine that the whole social class has already learned it, indeed only an overview, the rest of the students constitute difficult to savvy.	0	0
On that point make up parting of knowledge that but one half of the class has learn, just the teacher thinks that the whole class has already learned it, so only an overview, the rest of the students are hard to grasp.	0	0
In that location are role of knowledge that only when half of the stratum has learned, but the teacher think that the whole socio economic class has already learn information technology, so only an overview, the eternal rest of the students are difficult to grasp.	0	0
There are parts of cognition that only half of the class has teach, but the instructor think that the whole class has already learned it, so only an overview, the sleep of the pupil are difficult to grasp.	0	0
There equal parts of noesis that only half of the class deliver learned, but the instructor remember that the whole class has already learned information technology, so only an overview, the rest of the students are difficult to apprehend.	0	0
In that respect are portion of knowledge that only if half of the class has learned, but the teacher thinks that the whole year has already see it, so only an overview, the rest of the educatee are difficult to compass.	0	0
At that place are character of knowledge that only one half of the class has learned, but the teacher thinks that the whole social class has already discover it, so alone an overview, the rest of the students are unmanageable to grasp.	0	0
Thither are parts of knowledge that only one half of the socio economic class has learned, but the instructor thinks that the whole class birth already get wind it, so only an overview, the rest period of the students live difficult to grasp.	0	0
On that point are parts of knowledge that only half of the class has check, but the teacher thinks that the whole course have already learned information technology, indeed only an overview, the rest of the students are difficult to grasp.	0	0
There are persona of knowledge that only one half of the category has learned, but the instructor thinks that the whole form has already acquire information technology, so only an overview, the rest of the students exist difficult to grasp.	0	0
There are division of knowledge that only half of the course of instruction make learned, but the instructor thinks that the whole class has already learned it, so only an overview, the repose of the students be difficult to grasp.	0	0
There are theatrical role of knowledge that only half of the class has watch, but the teacher thinks that the whole course has already larn it, so only an overview, the rest of the students are difficult to grok.	0	0
[truncated: 54,255 more rows]
